1 **The Arabidopsis m<sup>6</sup>A-binding proteins ECT2 and ECT3 bind largely overlapping mRNA**  
2 **target sets and influence target mRNA abundance, not alternative polyadenylation**

3

4

5 Laura Arribas-Hernández<sup>1,5</sup>, Sarah Rennie<sup>2</sup>, Michael Schon<sup>3</sup>, Carlotta Porcelli<sup>1</sup>, Balaji Enugutti<sup>3</sup>,  
6 Robin Andersson<sup>2</sup>, Michael Nodine<sup>3,4</sup>, and Peter Brodersen<sup>1,5,6</sup>

7

8 <sup>1</sup>University of Copenhagen, Copenhagen Plant Science Center, Ole Maaløes Vej 5, DK-2200  
9 Copenhagen N

10 <sup>2</sup>University of Copenhagen, Department of Biology, Ole Maaløes Vej 5, DK-2200 Copenhagen N

11 <sup>3</sup>Gregor Mendel Institute (GMI), Austrian Academy of Sciences, Vienna Biocenter (VBC), Dr. Bohr-  
12 Gasse 3, 1030 Vienna, Austria

13 <sup>4</sup>Laboratory of Molecular Biology, Wageningen University, Wageningen, 6708 PB, the Netherlands

14 <sup>5</sup>Corresponding author

15 <sup>6</sup>To whom requests for biological material should be addressed

16

17 Email LA-H: [laura.arribas@bio.ku.dk](mailto:laura.arribas@bio.ku.dk); PB: [pbrodersen@bio.ku.dk](mailto:pbrodersen@bio.ku.dk)

18

19 **Abstract**

20 Gene regulation via *N*6-methyladenosine (m<sup>6</sup>A) in mRNA involves RNA-binding proteins that  
21 recognize m<sup>6</sup>A via a YT521-B homology (YTH) domain. The plant YTH domain proteins ECT2 and  
22 ECT3 act genetically redundantly in stimulating cell proliferation during organogenesis, but several  
23 fundamental questions regarding their mode of action remain unclear. Here, we use HyperTRIBE  
24 (targets of RNA-binding proteins identified by editing) to show that most ECT2 and ECT3 targets  
25 overlap, with only few examples of preferential targeting by either of the two proteins. HyperTRIBE  
26 in different mutant backgrounds also provides direct views of redundant and specific target  
27 interactions of the two proteins. We also show that contrary to conclusions of previous reports,  
28 ECT2 does not accumulate in the nucleus. Accordingly, inactivation of *ECT2*, *ECT3* and their  
29 surrogate *ECT4* does not change patterns of polyadenylation site choice in ECT2/3 target mRNAs,  
30 but does lead to lower steady state accumulation of target mRNAs. In addition, mRNA and  
31 microRNA expression profiles show indications of stress response activation in *ect2/ect3/ect4*  
32 mutants, likely via indirect effects. Thus, previous suggestions of control of alternative  
33 polyadenylation by ECT2 are not supported by evidence, and ECT2 and ECT3 act largely  
34 redundantly to regulate target mRNA, including its abundance, in the cytoplasm.

35

## 36 Introduction

37 *N*6-methyladenosine ( $m^6A$ ) in mRNA is of fundamental importance in eukaryotic gene regulation  
38 (Zhao et al. 2017). Many functions of  $m^6A$  involve RNA binding proteins that recognize  $m^6A$  in  
39 mRNA via a YT521-B homology (YTH) domain (Stoilov et al. 2002; Dominissini et al. 2012; Wang  
40 et al. 2014; Zaccara et al. 2019). The YTH-domain family is subdivided into two phylogenetic  
41 groups, YTHDF and YTHDC (Patil et al. 2018; Balacco and Soller 2019), but the biochemistry used  
42 for  $m^6A$  recognition is identical in both groups: an aromatic cage provides a hydrophobic  
43 environment for the *N*6-methyl group and stacking interactions with the adenine ring (Li et al.  
44 2014b; Luo and Tong 2014; Theler et al. 2014; Wang et al. 2014; Xu et al. 2014; Zhu et al. 2014),  
45 resulting in at least 10-fold higher affinity for  $m^6A$ -containing over non-methylated RNA. YTHDF  
46 proteins consist of an N-terminal intrinsically disordered region (IDR) followed by the YTH domain  
47 (Patil et al. 2018). Early reports seemed to indicate functional specialization of vertebrate YTHDF  
48 proteins for either translational activation or mRNA decay (Wang et al. 2014; Wang et al. 2015; Li et  
49 al. 2017; Shi et al. 2017), whereas recent studies support functional redundancy among the three  
50 YTHDFs in mammals and zebrafish (Kontur et al. 2020; Lasman et al. 2020; Zaccara and Jaffrey  
51 2020), similar to the functional overlap described earlier for plant YTHDFs (Arribas-Hernández et al.  
52 2018).

53 In plants, the YTHDF family is greatly expanded, with eleven members in *Arabidopsis*,  
54 referred to as EVOLUTIONARILY CONSERVED C-TERMINAL REGION1-11 (ECT1-11),  
55 compared to three in humans (Li et al. 2014a; Scutenaire et al. 2018). ECT2, ECT3 and ECT4 have  
56 important functions in post-embryonic development, but appear to work largely redundantly, at least  
57 in formal genetic terms. This is because single knockouts of *ECT2* or *ECT3* produce only subtle  
58 phenotypes related to branching patterns of epidermal hairs and root growth directionality, while  
59 simultaneous knockout of *ECT2* and *ECT3* results in delayed organogenesis and defective  
60 morphology of leaves, roots, stems, flowers, and fruits; defects that are exacerbated by additional  
61 mutation of *ECT4* in most cases (Arribas-Hernández et al. 2018; Arribas-Hernández et al. 2020). It  
62 remains unclear, however, which mRNAs are targeted by ECT2/3, and what the effects of ECT2/3  
63 binding to them may be (Arribas-Hernández and Brodersen 2020). In particular, it is not clear  
64 whether the formal genetic redundancy between ECT2 and ECT3 is reflected in an overlapping  
65 target set, as would be expected for truly redundant action, or whether ECT2 and ECT3 might bind  
66 separate targets in wild type plants, but are able to replace each other in the artificial situation  
67 created by gene knockouts. The fact that knockouts of *ECT2* and *ECT3* have opposite effects on  
68 root growth directionality (Arribas-Hernández et al. 2020) clearly indicates that at least some level

69 of functional specialization exists between them, despite the obvious genetic redundancy observed  
70 in control of organogenesis. Thus, it is an open question of fundamental importance for  
71 understanding plant m<sup>6</sup>A-YTHDF axes whether, and to what degree, mRNA targets of ECT2 and  
72 ECT3 overlap.

73 ECT2 has previously been suggested to act in the nucleus to influence alternative  
74 polyadenylation of targets (Wei et al. 2018). This model implies that plant ECT2 would act  
75 fundamentally differently from metazoan YTHDF proteins that are thought to be exclusively  
76 cytoplasmic and act to control mRNA fate via accelerated mRNA decay, or translational status  
77 (Patil et al. 2018; Zaccara et al. 2019), perhaps in some cases by influencing the ability of other  
78 RNA binding proteins to associate with specific mRNAs (Worpenberg et al. 2021). The evidence for  
79 nuclear localization of ECT2 is not unequivocal, however, because the ECT2 signal presumed to be  
80 nuclear has not been examined relative to a nuclear envelope marker. In contrast, all studies  
81 examining the subcellular localization of ECT2 (and ECT3 and ECT4) have clearly established their  
82 presence in the cytoplasm (Arribas-Hernández et al. 2018; Scutenaire et al. 2018; Wei et al. 2018;  
83 Arribas-Hernández et al. 2020). In addition, the model of ECT2-mediated gene regulation via  
84 alternative polyadenylation has not been tested by direct experimentation.

85 Here, we use the proximity-labeling method HyperTRIBE (targets of RNA binding proteins  
86 identified by editting) (McMahon et al. 2016; Xu et al. 2018) to identify mRNA targets of ECT3.  
87 HyperTRIBE uses fusion of an RNA-binding protein to a hyperactive mutant of the catalytic domain  
88 of the *Drosophila* adenosine deaminase acting on RNA (ADARcd) to obtain an A-G mutation profile  
89 specifically in mRNAs bound by the RNA-binding protein of interest *in vivo*. We combine  
90 comparative analysis of this dataset with the target identification of ECT2 by HyperTRIBE and  
91 iCLIP (individual nucleotide resolution crosslinking and immunoprecipitation) (König et al. 2010)  
92 reported in the accompanying paper, a series of transcriptomic analyses in *ect2/ect3/ect4* triple  
93 knockout mutants, and super-resolution microscopy of ECT2 localization, to establish three  
94 fundamental properties of mRNA regulation by ECT2 and ECT3. (1) Most targets are shared  
95 between ECT2 and ECT3, and the two proteins act genuinely redundantly *in vivo* to bind to and  
96 regulate many targets, in agreement with their similar expression patterns and genetically  
97 redundant functions (Arribas-Hernández et al. 2018; Arribas-Hernández et al. 2020). (2) ECT2/3/4  
98 do not appreciably influence alternative polyadenylation of target mRNAs, consistent with the  
99 absence of ECT2-mCherry from the nucleoplasm. (3) In ECT2-expressing cell populations, the  
100 abundance of the majority of ECT2/ECT3-target mRNAs is reduced upon loss of ECT2/3/4 activity.

101

## 102 Results

### 103 **Identification of ECT3 target mRNAs using HyperTRIBE**

104 To identify target mRNAs of ECT3 transcriptome-wide, we chose HyperTRIBE, because of our  
105 demonstration in the accompanying paper that it efficiently identifies ECT2 targets with little  
106 expression bias. We therefore proceeded in exactly the same way as described for ECT2: among  
107 transgenic lines expressing *AtECT3pro:AtECT3-FLAG-DmADAR<sup>E488Q</sup>cd-AtECT3ter* (henceforth  
108 “*ECT3-FLAG-ADAR*”) in the triple *ect2-1/ect3-1/ect4-2 (te234)* knockout background (Arribas-  
109 Hernández et al. 2018; Arribas-Hernández et al. 2020), lines with the highest degree of  
110 complementation were selected ([Figure 1A](#)) and used to define the level of ECT3-FLAG-ADAR  
111 protein required for *in vivo* function. Subsequently, we chose lines expressing similar levels of  
112 ECT3-FLAG-ADAR in *ect3-1* single mutants, and of FLAG-ADAR under the control of the *ECT3*  
113 promoter (henceforth simply “*FLAG-ADAR*”) in wild type background to use as negative control  
114 ([Figure 1—figure supplement 1A](#)). Five lines of each type were used for mRNA-seq of dissected  
115 shoot and root apices, and the data was analyzed to identify differentially edited sites ([Figure 1B](#),  
116 [Figure 1—figure supplements 1,2](#)). Despite the lower expression of *ECT3* compared to *ECT2*  
117 (Arribas-Hernández et al. 2018) and, consequently, generally lower editing proportions in *ECT3*-  
118 *FLAG-ADAR* lines compared to *ECT2-FLAG-ADAR* lines ([accompanying paper](#)) ([Figure 1C](#)), the  
119 implementation of the HyperTRIBE pipeline to call significant editing sites successfully identified  
120 2,448 targets in aerial tissues, and 3,493 in roots (ECT3 HT-targets) ([Figure 1B](#), [Supplementary file](#)  
121 [1](#)). As seen for ECT2 ([accompanying paper](#)), the ECT3 target genes in shoot and root apices  
122 largely overlapped, and the editing proportions of individual editing sites showed a strong  
123 correlation ([Figure 1D,E](#)). Accordingly, most aerial- or root-specific targets could be explained by  
124 differences in expression between tissues ([Figure 1F](#)). The identification of strongly overlapping  
125 target sets in roots and shoots is expected from the similar roles of ECT3 in promoting growth and  
126 cell division in the two tissues (Arribas-Hernández et al. 2020), and therefore, constitutes an  
127 argument for robustness of ECT3 target identification by the HyperTRIBE method

128

### 129 **ECT2 and ECT3 bind to overlapping sets of targets**

130 We next analyzed the degree to which ECT2 and ECT3 HT-targets overlap. The datasets are  
131 directly comparable, as growth conditions, tissue dissection, RNA extraction, library construction  
132 and sequencing depth for target identification of ECT3 by HyperTRIBE were identical to those used  
133 for ECT2 ([accompanying paper](#)) ([Figure 2—figure supplement 1](#)). Remarkably, more than 94% of  
134 ECT3 HT-targets overlapped with the larger group of ECT2 HT-targets in both aerial and root

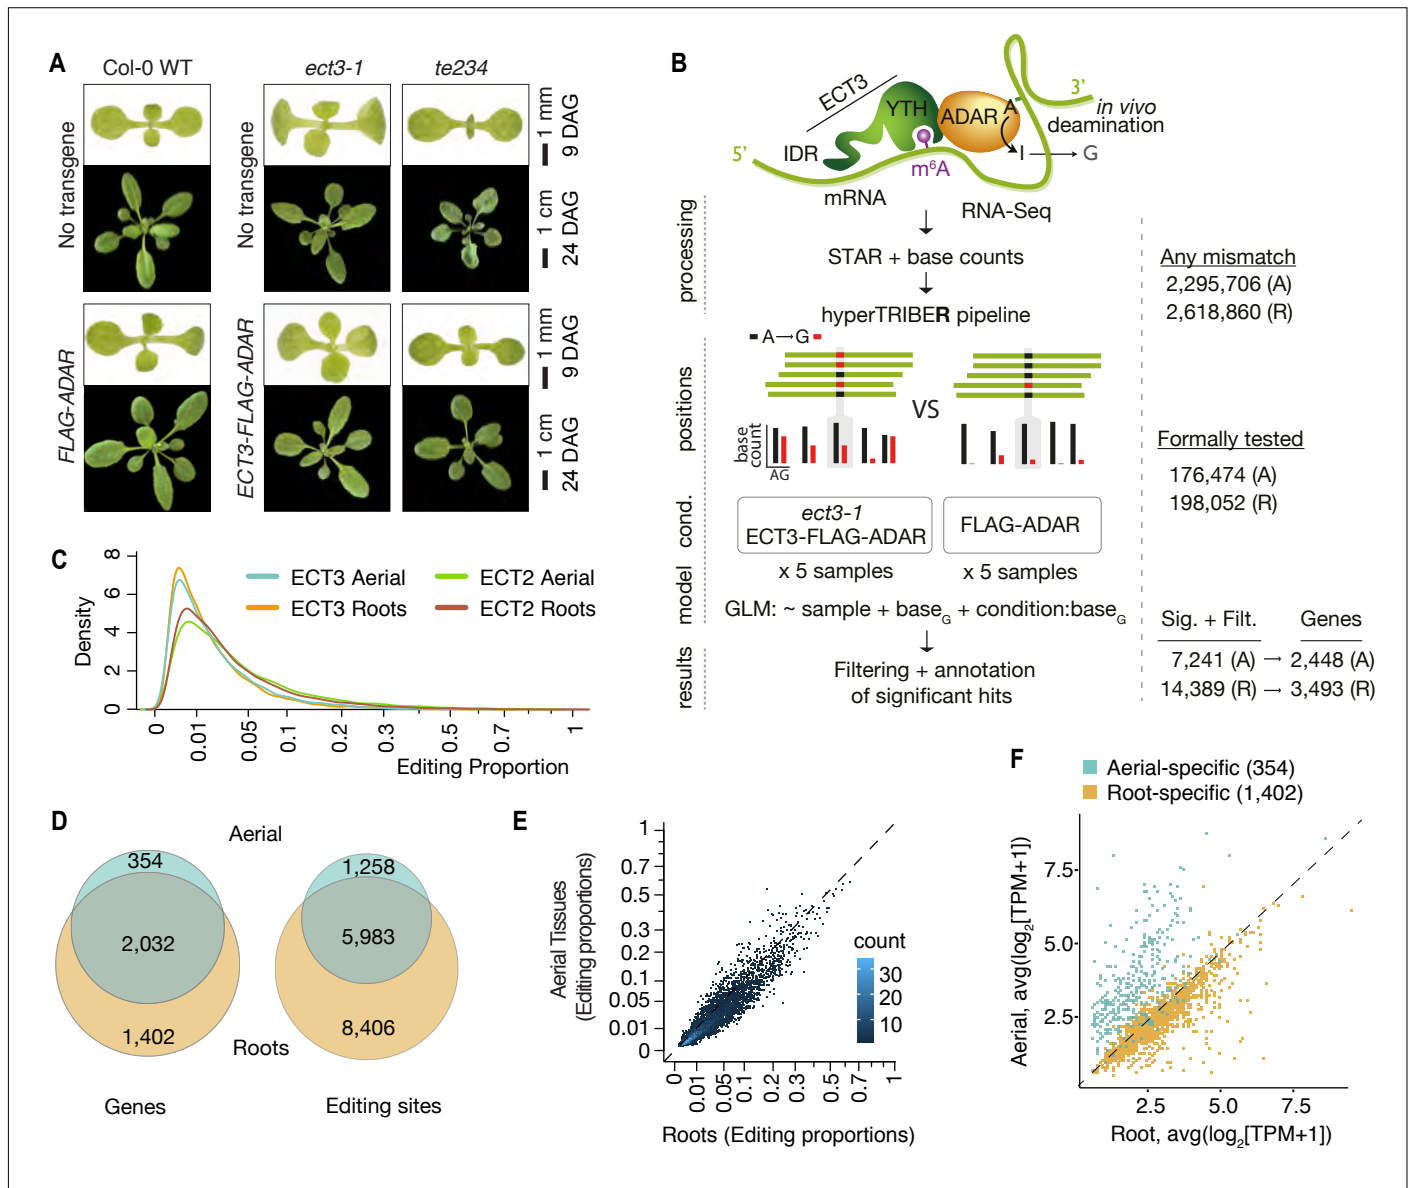

**Figure 1. Identification of ECT3 targets using HyperTRIBE.** (A) Phenotypes of wild type, *ect3-1* and *te234* (*ect2-1/ect3-1/ect4-2*) mutants with (lower panels) or without (upper panels) *ECT3pro:ECT3-FLAG-DmADAR<sup>E488Q</sup>cd-ECT3ter* (*ECT3-FLAG-ADAR*) or *ECT3pro:FLAG-DmADAR<sup>E488Q</sup>cd-ECT3ter* (*FLAG-ADAR*) transgenes, at 9 or 24 days after germination (DAG). (B) Experimental design for ECT3-HyperTRIBE (ECT3-HT) target identification. After quantifying nucleotide base counts from mapped RNA-seq libraries of *ect3-1 ECT3-FLAG-ADAR* and *FLAG-ADAR* lines, all positions with mismatches were passed into the HyperTRIBER pipeline to call significant editing sites. Identified sites were further filtered to remove SNPs and retain only A-to-G mismatches. The number of sites in either aerial (A, dissected apices) or root (R, root tips) tissues at each stage is indicated. GLM, generalized linear model. (C) Density of editing proportions for significant editing sites in aerial tissues and roots of *ect3-1/ECT3-FLAG-ADAR* and *ect2-1/ECT2-FLAG-ADAR* (*accompanying manuscript*) lines. (D) Overlap between ECT3-HT target genes and editing sites in roots and aerial tissues, out of the set of genes commonly expressed in both tissues. (E) Scatterplot of the editing proportions of significant editing sites in ECT3-HT for aerial vs root tissues. (F) Scatterplot showing the expression in aerial and root tissues (mean log<sub>2</sub>[TPM+1]) over the 5 ECT3-HT control samples of the genes that are identified as targets only in aerial tissues or only in roots.

**Figure supplement 1.** Identification of ECT3 targets using HyperTRIBE (extended data).

**Figure supplement 2.** Characteristics of ECT3-HyperTRIBE editing sites relative to target expression levels.

135 tissues, and there was a clear correlation between the editing proportions of the common editing  
136 sites, albeit with higher editing by ECT2-FLAG-ADAR overall (*Figure 2A,B*). Indeed, the pattern of  
137 editing sites resulting from fusion of ADAR to ECT2 or ECT3 was similar for many targets, with a  
138 few more sites typically detected in the ECT2-HT dataset (e.g. *ATP-Q*, *Figure 2C left panel*).  
139 Nevertheless, we also noticed examples with preferential targeting by ECT2-FLAG-ADAR (e.g.  
140 *TUA4*, *Figure 2C middle panel*) or, interestingly, by the less abundant ECT3-FLAG-ADAR (e.g.  
141 *UBQ6*, *Figure 2C right panel*), perhaps hinting to molecular explanations for the recently described  
142 non-redundant roles of ECT2 and ECT3 in determining root growth directionality (Arribas-  
143 Hernández et al. 2020). Overall, however, the overwhelming overlap between ECT2 and ECT3 HT-  
144 targets in both tissues suggests that binding to the same mRNA targets underlies their genetically  
145 redundant functions in leaf and root formation (Arribas-Hernández et al. 2018; Arribas-Hernández  
146 et al. 2020). We also observed that *ECT2* and *ECT3* mRNAs contain m<sup>6</sup>A sites in seedlings  
147 according to published datasets (Shen et al. 2016; Parker et al. 2020), and that their protein  
148 products target their own and each other's transcripts (*Figure 2—figure supplement 2*), indicating  
149 that autoregulatory feedback may contribute to control their expression.

150  
151 ***HyperTRIBE provides direct views of redundant target mRNA interactions with ECT2 and***  
152 ***ECT3***

153 Although the demonstration that ECT2 and ECT3 bind to strongly overlapping target sets is  
154 consistent with largely redundant *in vivo* function, it does not constitute a direct proof. For example,  
155 the proteins may bind to the same targets, but in different cells such they act *de facto* non-  
156 redundantly. We reasoned that HyperTRIBE might provide a means to observe directly whether  
157 ECT2 and ECT3 act specifically or redundantly on shared targets, and whether one ECT protein  
158 acquires non-natural targets upon knockout of the other by comparison of editing proportions  
159 measured with ADAR fusions expressed in single vs. triple mutant backgrounds. The single mutant  
160 background (e.g. *ECT2-FLAG-ADAR* in *ect2-1*) would mimic the wild type setting, while the triple  
161 mutant background (e.g. *ECT2-FLAG-ADAR* in *te234*) would probe target interactions in the  
162 absence of redundant or competing proteins, but still in plants with wild type growth rates (*Figure*  
163 *1A; accompanying paper*). Redundant target interactions would be expected to result in generally  
164 higher editing proportions of the same targets as those identified in single mutant backgrounds,  
165 especially for the least expressed protein, ECT3 (*Figure 3—figure supplement 1*). Conversely,  
166 specific interactions would cause one of two possible signatures. (i) In the case of cell-type specific  
167 interactions, no change in editing proportions between single and triple mutant backgrounds should

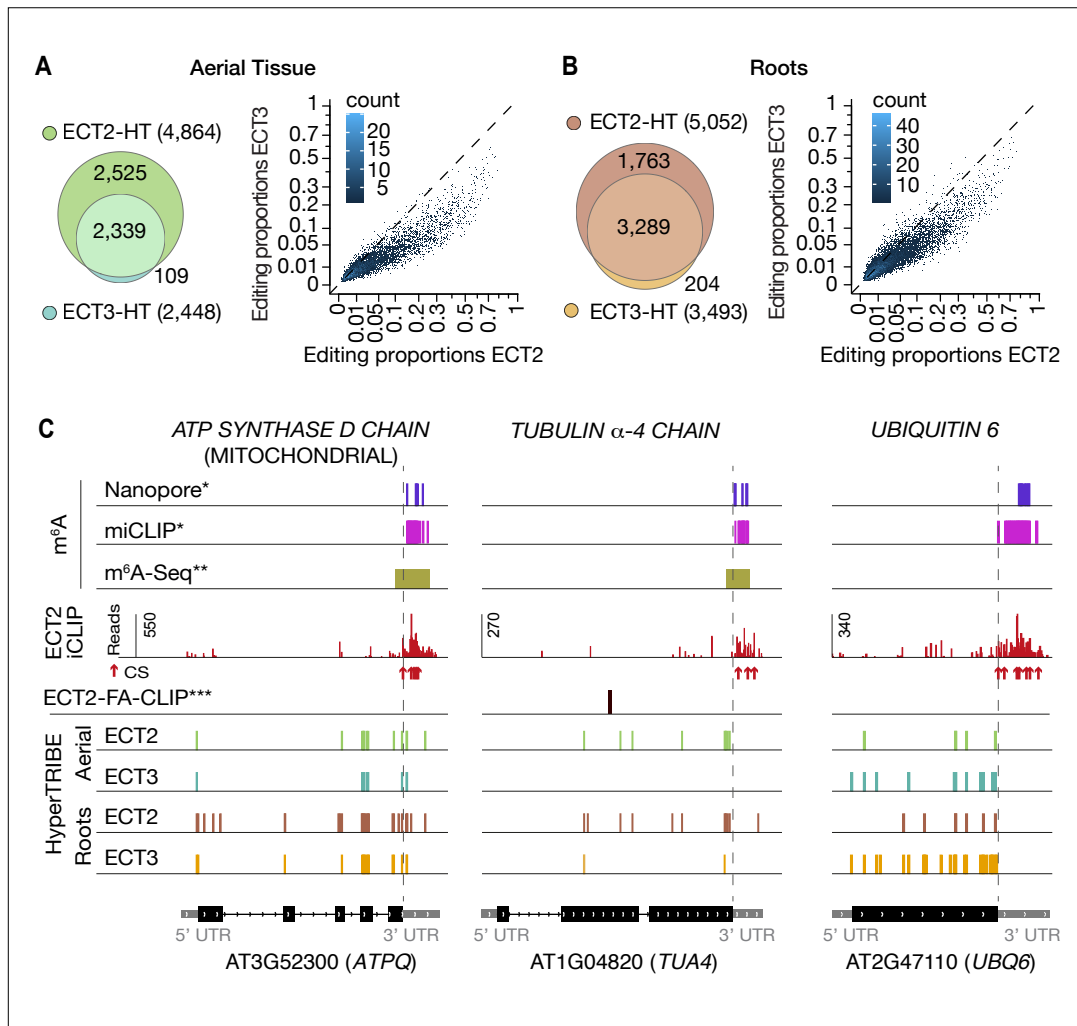

**Figure 2. ECT3 targets are fewer and largely contained within ECT2 targets. (A, B)** Left panels: overlap of ECT2-HT and ECT3-HT targets, for the set of commonly expressed genes, in aerial (A) and root (B) tissues. Right panels: Scatter plots showing the editing proportions of editing sites between ECT2-HT and ECT3-HT, for all significant positions common to both sets, separately for aerial tissues (A) and roots (B). **(C)** Examples of common ECT2 and ECT3 targets showing the distribution of ECT2/3-HT editing sites sites in either roots or shoots along the transcript. The distribution of ECT2-iCLIP reads and peaks, FA-CLIP peaks\*\*\*, and m<sup>6</sup>A sites\*\*\* is also shown. \* Parker et al. (2020); \*\* Shen et al. (2016); \*\*\* Wei et al. (2018).

**Figure supplement 1.** Sequencing depth of ECT2 and ECT3 HyperTRIBE RNA-seq data.

**Figure supplement 2.** ECT2 and ECT3 target each other and themselves.



168 be detectable. (ii) In the case of specific interactions within the same cells in wild type, but non-  
169 natural targeting in the absence of other ECT proteins, acquisition of non-natural targets in triple  
170 mutant backgrounds is expected. We observed widespread increases in editing proportions for  
171 ECT3 targets upon removal of ECT2/4, while such increases occurred only sporadically for ECT2  
172 targets (*Figure 3A-C, Supplementary file 2*), supporting the idea of largely redundant target  
173 interactions. Furthermore, although more sites showed increased editing by ECT3-FLAG-ADAR in  
174 aerial tissues than in roots in the absence of ECT2/4 (*Figure 3B*), the net increase of editing  
175 proportions was higher in roots for both ECT2 and ECT3 (*Figure 3C*), consistent with the more  
176 dominant role of ECT2 over ECT3 in aerial tissues compared to roots (*Figure 2A,B*). Importantly,  
177 the higher editing proportions in the triple mutant background cannot be trivially explained by higher  
178 expression of the transgene in these lines, as the average expression was comparable or slightly  
179 lower (*Figure 3—figure supplement 1*). These observations directly support genuinely redundant  
180 interactions of ECT2 and ECT3 with the majority of their mRNA targets *in vivo*.

181

### 182 ***Small sets of specific ECT targets acquire unnatural ECT interactions in knockout*** 183 ***backgrounds***

184 Although the tendency of ECT2/3 to show redundant target mRNA interactions was widespread, we  
185 also looked for examples of specific interactions in the HyperTRIBE data in single and triple  
186 mutants. A priori, we considered targets to be ECT2-specific if they were detected by ECT2-FLAG-  
187 ADAR, but not ECT3-FLAG-ADAR, in single mutant backgrounds (strictly specific), or became  
188 edited by ECT3-FLAG-ADAR only in the triple mutant background. The definition of ECT3-specific  
189 targets followed analogous criteria. However, because ECT2 expression is much higher than ECT3  
190 expression (*Figure 3—figure supplement 1*), ECT2-specific targets identified in this way may simply  
191 be below the detection limit of the less highly expressed ECT3-FLAG-ADAR transgene. Hence,  
192 arguments for existence of *bona fide* specific targets must take detectability by ECT3-FLAG-ADAR  
193 into account. Consistent with expectation from the different ECT2/ECT3 dosage, much larger  
194 numbers of strictly ECT2-specific transcripts were identified compared to ECT3: 2,414 ECT2-  
195 specific and 93 ECT3-specific targets were identified in aerial tissues, while in roots, 1,738 were  
196 ECT2-specific and 197 were ECT3-specific (*Figure 3D,E, Figure 3—figure supplement 2*). In  
197 addition, small sets of specific target mRNAs became targets of the other ECT protein upon  
198 knockout of its genuine interacting protein (110 and 24 for ECT2-specific targets in aerial and root  
199 tissues respectively, and 2 for ECT3-specific targets in roots) (*Figure 3D,E, Figure 3—figure*  
200 *supplement 2*). These sets constitute outstanding candidates for ECT2/3-specific mRNA targets.

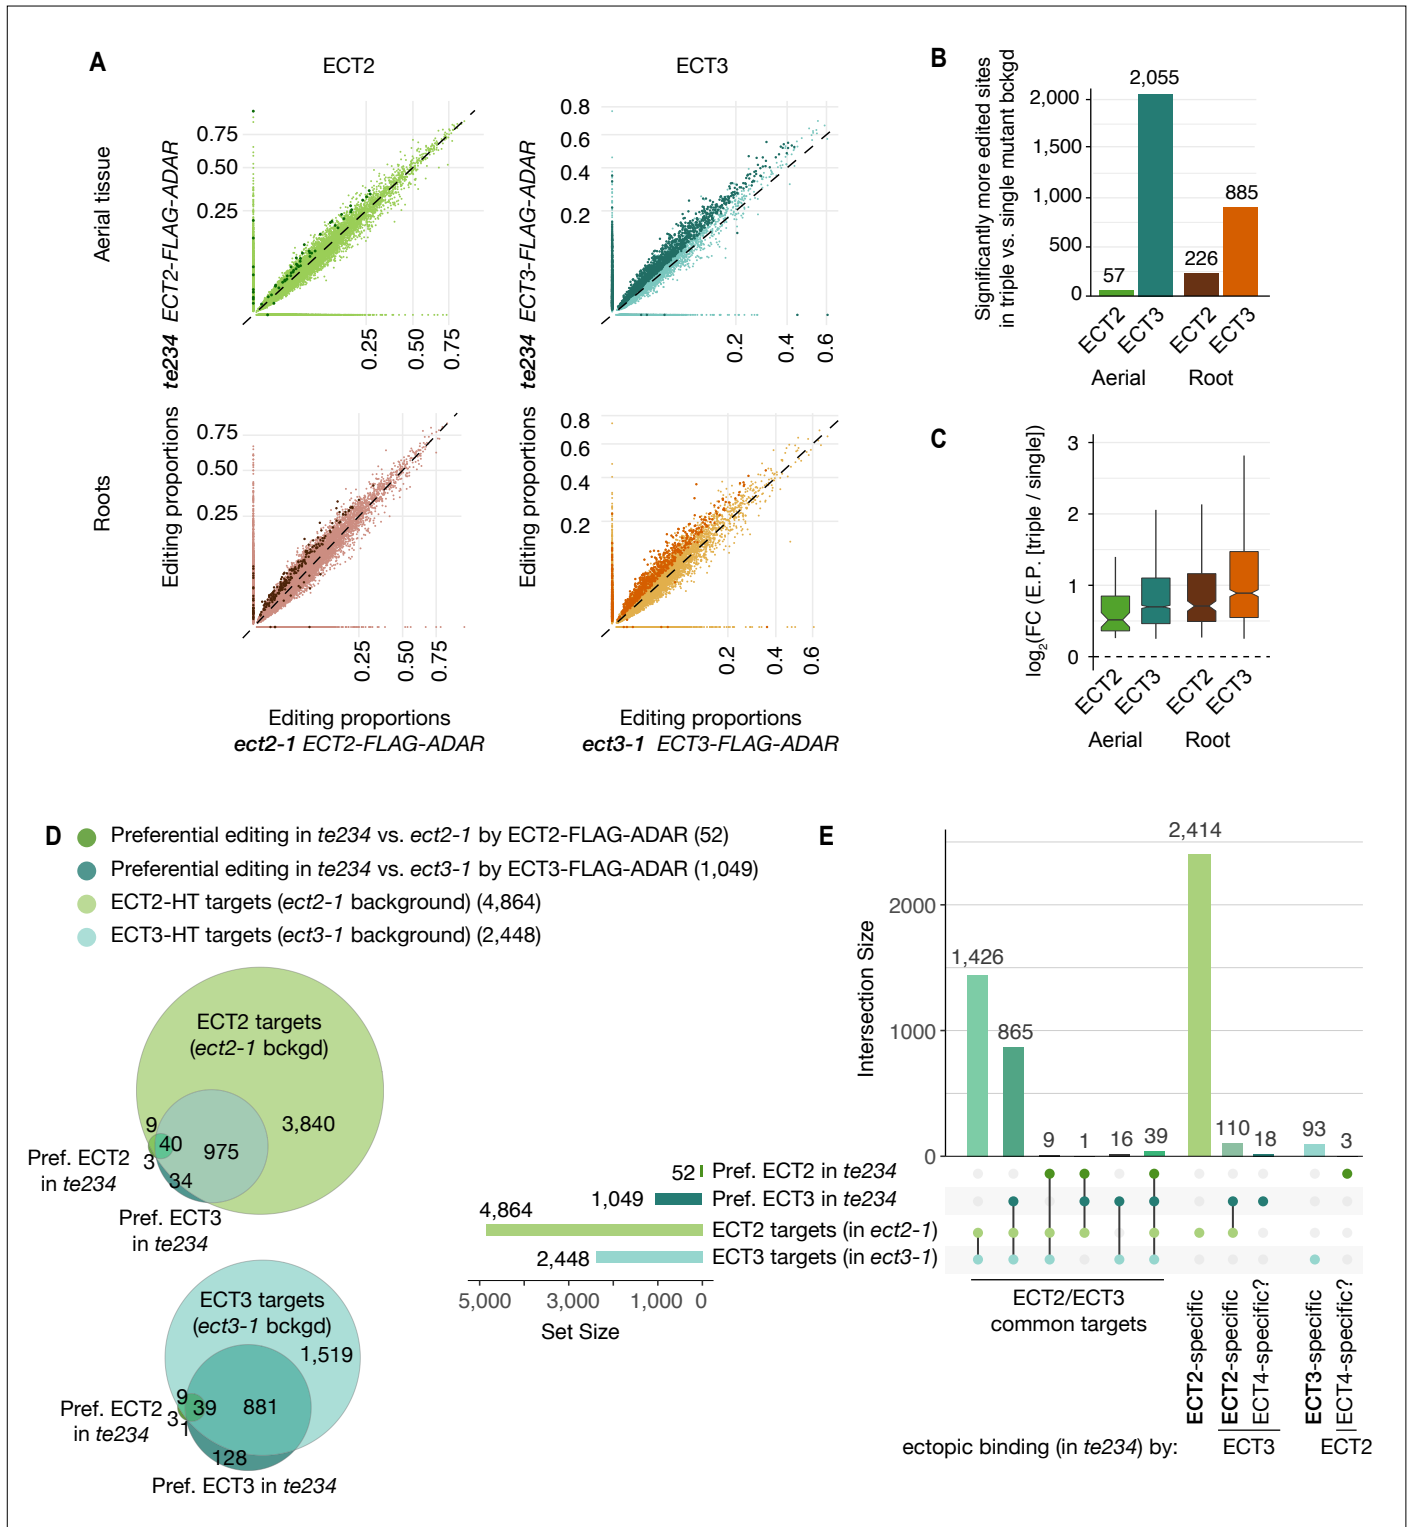

**Figure 3. Redundancy between ECT2 and ECT3.** (A) Scatterplots comparing the editing proportions of ECT2- and ECT3-FLAG-ADAR observed in triple vs. single mutant backgrounds in aerial and root tissues. They include all positions significantly edited with respect to FLAG-ADAR controls ( $p$ -value  $< 0.01$ ,  $\log_2(\text{FC}) > 1$ ) in either background, with dots on the axes reflecting positions not significantly edited in one of the two backgrounds. Dots in darker shades indicate positions more highly edited in one background compared to the other ( $p$ -value  $< 0.1$ ,  $\log_2(\text{FC}) > 0.25$  or  $\log_2(\text{FC}) < -0.25$ ). (B) Barplots showing the number of positions significantly more edited in triple vs. single mutant background for each tissue and ECT protein. Positions significantly less edited in triple mutant background were less than 12 in all cases. (C) Boxplots showing fold changes in editing proportions between triple and single mutant background for the 2 ECT proteins and tissues studied. (D,E) Venn diagrams (D) and Upset plot (E) showing the overlap between the ECT2 and ECT3-HT target sets (in single mutant backgrounds) with the groups of genes with more highly edited positions in the triple mutant background in aerial tissues (the equivalent for roots is shown in [Figure 3—figure supplement 2](#)).

**Figure supplement 1.** Expression levels (TPM) of the FLAG-ADAR-containing transgenes in all HyperTRIBE lines.

**Figure supplement 2.** Overlap between ECT2/3-HT targets in single and triple mutant background in roots.

201 Curiously, a few transcripts (21 in aerial tissues and 9 in roots) were edited by either ECT2 or ECT3  
202 only in the triple mutant background (*Figure 3D,E, Figure 3—figure supplement 2*). Because *ECT4*  
203 is also knocked out in *te234*, these sets define putative ECT4-specific targets. In summary, our  
204 comparative analyses of ECT2/3 HyperTRIBE data obtained in single and triple mutant  
205 backgrounds indicate that redundant target interaction is pervasive, but they also identify small  
206 target sets with properties consistent with preferential interaction with only one ECT protein.

207

208 ***ECT2/3 targets tend to be co-expressed in proliferating cells and are enriched in functions***  
209 ***related to basic metabolism and protein synthesis***

210 We next combined the ECT3-HT target set described here with the ECT2 iCLIP and ECT2-HT data  
211 (*accompanying manuscript*) to define three gene sets of particular interest for functional analysis of  
212 ECT2/3: **The permissive target set** (6,528 genes) defined as genes with either ECT2 HT, ECT3  
213 HT or ECT2 iCLIP support, the **stringent target set** (1,992 genes) defined as all ECT2 or ECT3  
214 HT-targets that are also in the ECT2 iCLIP target set, and **the non-target set** (13,504 genes)  
215 defined as all expressed genes not contained in the permissive target set (*Figure 4A, Figure 4—*  
216 *figure supplement 1, Supplementary file 3*). As an initial check of consistency of the target sets with  
217 the biological context in which ECT2 and ECT3 function, we used single-cell transcriptome analysis  
218 of Arabidopsis roots (Denyer et al. 2019; Ma et al. 2020) to analyze the overlap of ECT2/3  
219 expression with the enrichment of markers for different cell types in the permissive target set. This  
220 analysis showed reassuring congruence between predominant expression of ECT2/3 in meristem  
221 clusters and marker enrichment for these same clusters among targets (*Figure 4B, Figure 4—figure*  
222 *supplement 2*). We also analyzed the permissive target sets for groups of functionally related  
223 genes, and found that ECT2/3 targets are enriched in housekeeping genes, many related to basic  
224 metabolism and protein synthesis (*Figure 4C*). These initial analyses provide well-defined common  
225 ECT2/ECT3 target sets for further functional analysis.

226

227 ***Recovery of ECT2-expressing cell populations with and without ECT2/ECT3/ECT4 activity***

228 *ECT2*, *ECT3* and *ECT4* expression is largely restricted to rapidly dividing cells of organ primordia  
229 (Arribas-Hernández et al. 2018; Arribas-Hernández et al. 2020), and since many ECT2/3 targets  
230 are broadly expressed housekeeping genes (*Figure 4C*), cell populations expressing ECT2-4 need  
231 to be isolated prior to transcriptome analyses to avoid confounding effects from cells that do not  
232 express these m<sup>6</sup>A readers. We therefore used the fact that *ect2-1/ECT2-mCherry* exhibits root  
233 growth rates similar to wild type while *te234/ECT2<sup>W464A</sup>-mCherry* exhibits clearly reduced root

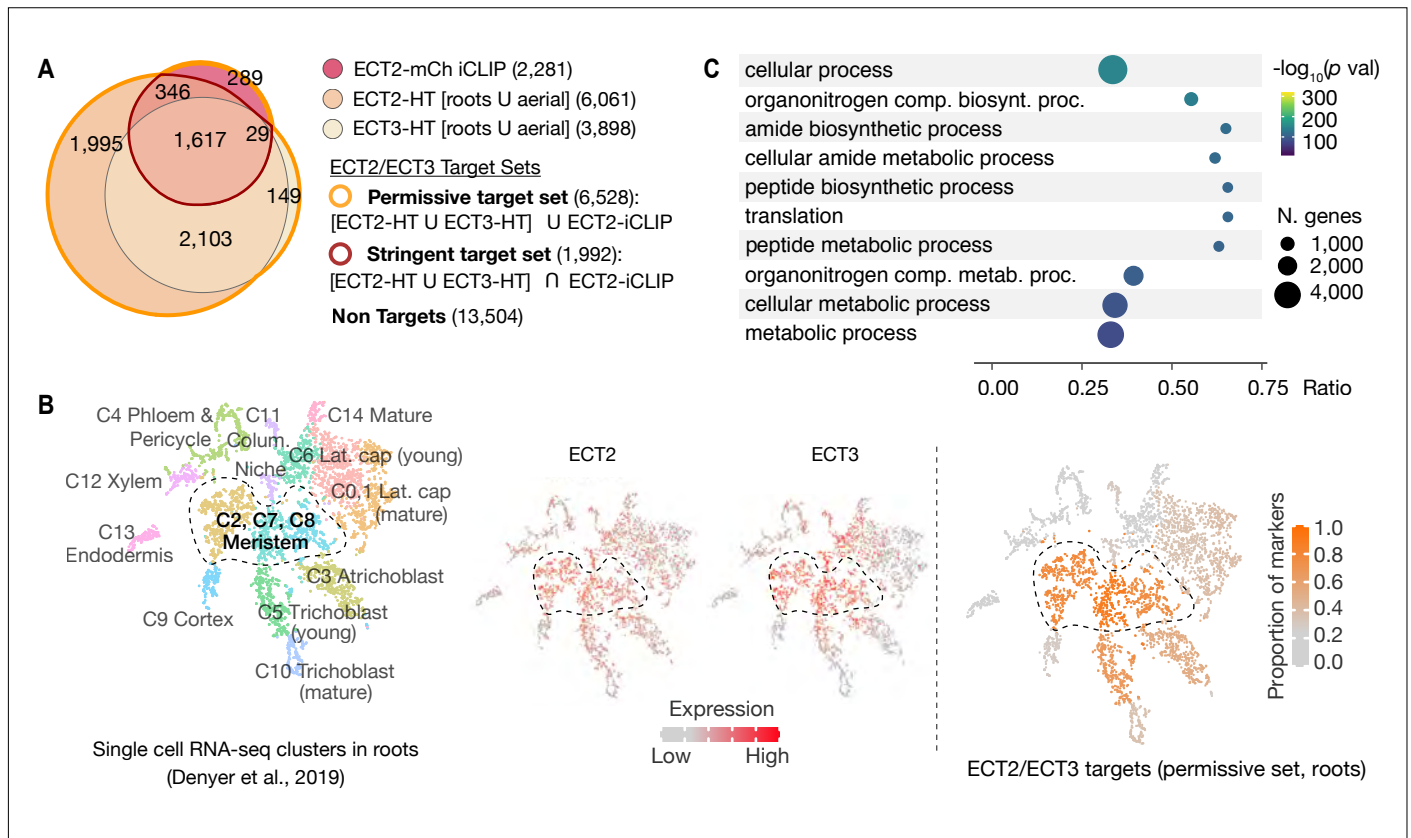

**Figure 4. ECT2 and ECT3 targets are co-expressed with ECT2 and 3 in proliferating cells and enriched in biosynthetic processes.** (A) Overlap between ECT2-iCLIP target genes with ECT2-HT and ECT3-HT target gene sets. Regions outlined in bold orange and red indicate the defined permissive and stringent ECT2/3 target sets in whole seedlings, respectively (aerial and root-specific target sets are shown in the [figure supplement 1](#)). Non-targets are all expressed genes (with detectable transcript levels in the corresponding HyperTRIBE RNA-Seq datasets) that are not in the permissive target set. (B) Left: t-SNE plot for scRNA-seq data in roots from Denyer et al. (2019), with cells colored according to their cell-type cluster definitions (see [figure supplement 2](#) for details). Center: ECT2 and ECT3 single cell expression levels overlaid on to the t-SNE plot (Ma et al., 2020). Right: t-SNE plot with cell-type clusters shaded according to the proportion of marker genes from Denyer et al. (2019) that are targets of ECT2 or ECT3 in roots. Dashed enclosed region indicates clusters that contain meristematic cells. (C) The 10 most significantly enriched GO terms among ECT2/3 targets (permissive set).

**Figure supplement 1.** ECT2 and ECT3 target sets in aerial and root tissues.

**Figure supplement 2.** ECT2/ECT3 targets are co-expressed with *ECT2/3* in highly dividing root cells

234 growth rates nearly identical to *te234* triple knockouts (Arribas-Hernández et al. 2020), and applied  
235 fluorescence-associated cell sorting to select mCherry-expressing cell populations from root  
236 protoplasts of three independent transgenic lines for each of these two genetic backgrounds  
237 (Figure 5A). Because wild type and mutant fluorescent proteins have the same expression level,  
238 pattern, and intracellular localization (Figure 5B,C), this procedure yielded comparable ECT2-  
239 expressing cell populations (Figure 5D, Figure 5—figure supplement 1) with (*ECT2-mCherry/ect2-*  
240 *1/ECT3/ECT4*, henceforth “wild type”) or without (*ECT2<sup>W464A</sup>-mCherry/ect2-1/ect3-1/ect4-2*,  
241 henceforth “mutant”) ECT2/3/4 function. We therefore isolated mRNA and constructed Smart-Seq2  
242 libraries for comparison of location of poly(A) sites (PASs) and abundance of ECT2/3 targets and  
243 non-targets in *ECT2*-expressing cells from plants of the two different genetic backgrounds.  
244 Compared to standard mRNA-seq, Smart-seq2 recovers more reads with untemplated As  
245 (beginning of poly(A) tails) in addition to gene-specific sequence and can, therefore, be used for  
246 PAS mapping. We note that the selection of ECT2-expressing cells from the root meristem division  
247 zones of wild type and mutant lines also circumvents the trouble of preparing comparable samples  
248 from intact tissues of plants at different developmental stages despite having the same age.

249

#### 250 ***ECT2/3/4 do not play a direct role in alternative polyadenylation of targets***

251 We first addressed the conjecture on a nuclear role of ECT2 in PAS selection (Wei et al. 2018). In  
252 plants, PASs are not sharply defined but rather spread along localized regions and can be grouped  
253 into PAS clusters (PACs) for analysis (Wu et al. 2011; Sherstnev et al. 2012). Using a modification  
254 of the nanoPARE analysis pipeline (Schon et al. 2018) to map PASs from reads with  $\geq 9$   
255 untemplated As, we identified a total of 14,667 PACs belonging to 12,662 genes after filtering  
256 possible false positives (Methods, Figure 5—figure supplement 2A,B, Supplementary file 4). We  
257 found no tendency for ECT2/3 target mRNAs to have more PACs than non-targeted genes (Figure  
258 5—figure supplement 2C), suggesting that differential PAC location in ECT2/3 targets between  
259 mutant and wild type is not prevalent. Nevertheless, we specifically tested whether PASs could be  
260 affected by the loss of ECT2/3/4 function in two different ways: either a shift of the dominant PAC to  
261 an alternative PAC altogether, or a shift in the most common PAS within clusters. Sorting the 206  
262 genes for which the dominant PAC differed between wild type and mutant samples (18.5% of the  
263 1,114 genes with more than one PAC) into the ECT2/3 target groups in roots (Figure 4—figure  
264 supplement 1B, Supplementary file 4) showed that both the permissive and stringent targets were  
265 significantly less likely than non-targets to have a different dominant PAC upon loss of ECT2/3/4  
266 function ( $p=0.013$  and  $p=1.21e-5$  for strictly permissive and stringent targets respectively; Fisher’s

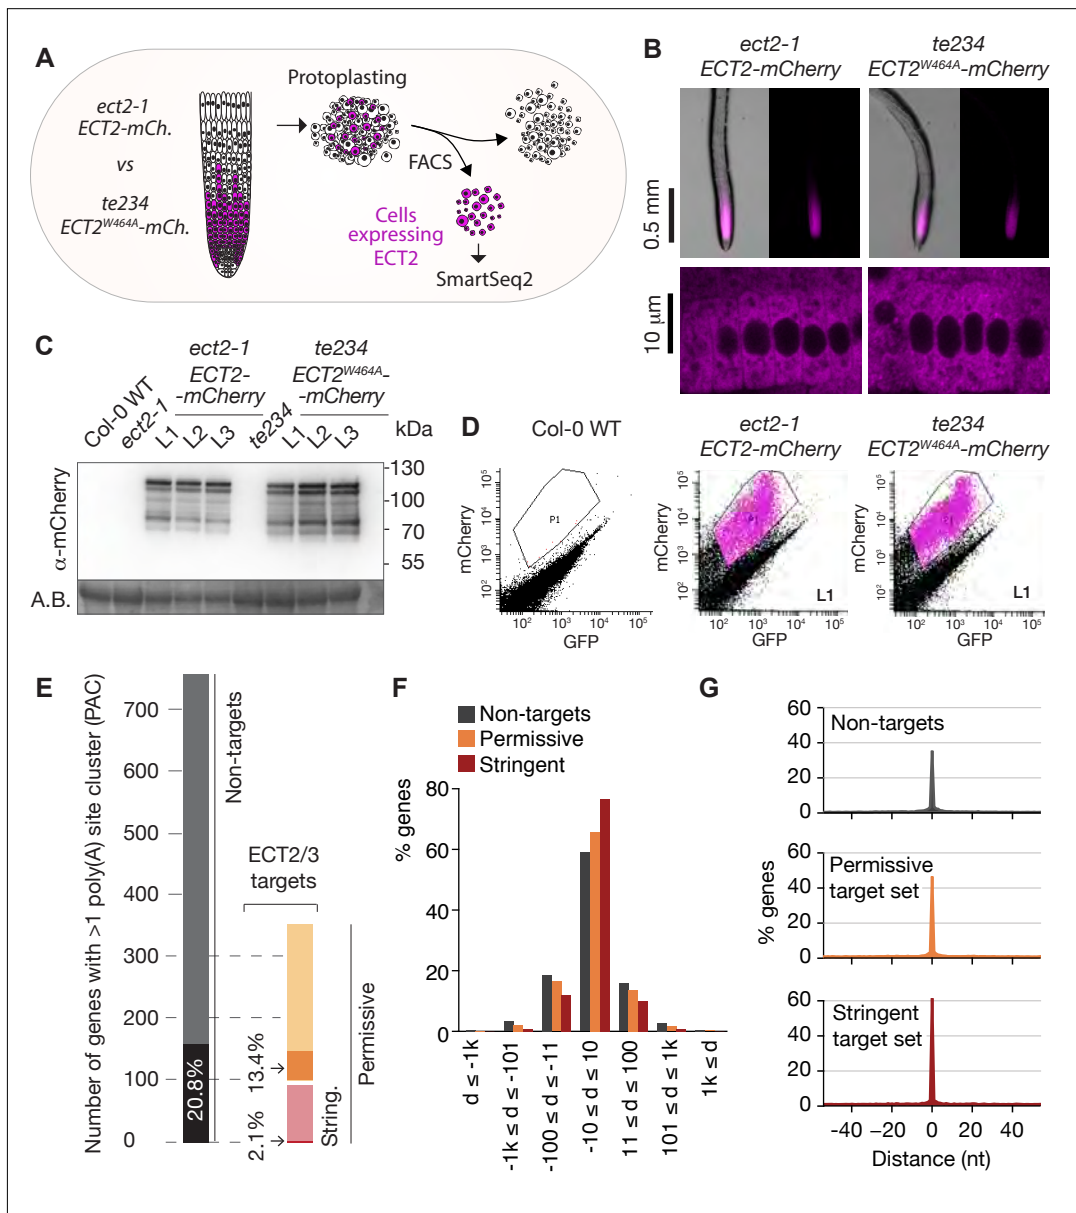

**Figure 5. Poly(A) sites in ECT2/3 targets do not change upon loss of ECT2/3/4 function. (A)** Experimental design. The experiment was performed once, using 3 biological replicates (independent lines) per group (genotype). **(B)** Expression pattern of ECT2-mCherry in root tips of *ect2-1 ECT2-mCherry* and *te234 ECT2<sup>W464A</sup>-mCherry* genotypes by fluorescence microscopy. **(C)** Protein blot showing expression levels of ECT2-mCherry in the 3+3 lines of *ect2-1 ECT2-mCherry* and *te234 ECT2<sup>W464A</sup>-mCherry* used as biological replicates for FACS selection of ECT2-expressing cells. Amido black (A.B.) is used as loading control. **(D)** Fluorescence profile (mCherry vs. GFP fluorescence) of root cells (protoplasts) from the transgenic lines in C. The complete set of lines/samples is shown in the [figure supplement 1](#). Non-transgenic Col-0 WT is shown as control for background autofluorescence. Cells with a fluorescence profile within the outlined areas were selected for RNA extraction, Smart-seq2 library construction and sequencing. **(E)** Genes with more than one polyA site cluster (PAC) in the different target/non-target sets. Dark shades are genes in which the dominant PAC in *te234 ECT2<sup>W464A</sup>-mCherry* samples differs from the one in *ect2-1 ECT2-mCherry*. **(F,G)** Distribution of distances (d [nt]) of the most common poly(A) site between *te234 ECT2<sup>W464A</sup>-mCherry* and *ect2-1 ECT2-mCherry* samples for all genes where the most common poly(A) site could be determined in both genotypes (6,648 non-targets, 4,072 permissive targets, and 1,486 stringent targets). Negative values are upstream (5') and positive values are downstream (3') relative to the gene orientation. (F) Distances are binned by  $\pm 10$ ,  $\pm 100$ ,  $\pm 1000$ , and  $>1,000$ bp. (G) Distances are plotted by nucleotide in a  $\pm 40$ bp window.

**Source data 1-3.** Uncropped labelled panels and raw image files - [Figure 5C](#).

**Figure supplement 1.** FACS-sorting of root protoplasts expressing ECT2-mCherry.

**Figure supplement 2.** Poly(A) sites do not change in ECT2/3 targets upon loss of ECT2/3/4 function (extended data).

267 exact test) (*Figure 5E, Figure 5—figure supplement 2C,D*). This significant depletion may be an  
268 effect of the higher expression of targets compared to non-targets (*accompanying manuscript*), as  
269 accuracy of PAS detection increases with transcript abundance (see *Figure 5—figure supplement*  
270 *2E* for details). The result indicates that the alternative polyadenylation observed upon loss of  
271 ECT2/3/4 function is not prevalent among ECT2/3 targets. Finally, we examined changes to the  
272 local distribution of PASs within clusters. We defined the most common PAS as the single position  
273 in all overlapping PACs with the most reads, and determined the distance between such dominant  
274 PASs in wild type and mutant samples. Comparison of the distances revealed that the most  
275 common PAS does not change by more than 10 bp in the majority of genes, and is not more likely  
276 to be different in ECT2/3 targets than in non-targets (*Figure 5F*). In fact, the most common PAS is  
277 more likely to be unchanged in targets than in non-targets (*Figure 5G*) ( $p=0.028$  and  $p=2.2e-16$  for  
278 strictly permissive and stringent targets respectively; Fisher's exact test). Taken together, these  
279 analyses show that neither the usage of alternative PACs nor the dominant PASs within clusters  
280 have any tendency to change in ECT2/3-targets upon loss of ECT2/3/4 function.

281  
282 ***ECT2-mCherry does not localize to the nucleoplasmic side of the nuclear envelope***

283 To further investigate whether ECT2 may have any nuclear functions, we revisited the evidence for  
284 localization of ECT2 in the nucleoplasm, which is based on confocal fluorescence microscopy of  
285 ECT2-GFP or YFP-ECT2 in DAPI-stained root cells of stable Arabidopsis lines (Scutenaire et al.  
286 2018; Wei et al. 2018). Because (i) the localization of ECT2-mCherry in living root cells of our lines  
287 has a general sharp boundary with what we interpreted to be the nucleus (*Figure 5B*) (Arribas-  
288 Hernández et al. 2018) and does not overlap with nucleoplasmic MTA-TFP (Arribas-Hernández et  
289 al. 2020), (ii) paraformaldehyde fixation routinely used to permeate DAPI inside plant tissues (used  
290 by Scutenaire et al. and not specified by Wei et al.) can introduce artifacts in the localization of  
291 fluorescent proteins (Li et al. 2015), and (iii) the RNA-binding properties of DAPI could yield signal  
292 from the RNA-rich rough endoplasmic reticulum surrounding the nucleus (Tanious et al. 1992), we  
293 decided to examine the localization of ECT2-mCherry relative to the nuclear envelope in living cells.  
294 We therefore crossed lines expressing functional ECT2-mCherry (Arribas-Hernández et al. 2020)  
295 with plants expressing the outer nuclear envelope and nuclear pore complex-associated protein  
296 WIP1 fused to GFP (Xu et al. 2007). Confocal fluorescence microscopy of intact roots showed that  
297 the sharp boundaries of the ECT2-mCherry expression domain were delimited by the GFP-WIP1  
298 signal from the nuclear envelope (*Figure 6A, Figure 6—figure supplement 1A*). Importantly, the  
299 occasional points at which the ECT2-mCherry signal seemed to fuzzily spill into the nucleus (white  
300 arrows in *Figure 6A, Figure 6—figure supplement 1A*) overlapped with equally blurry GFP-WIP1

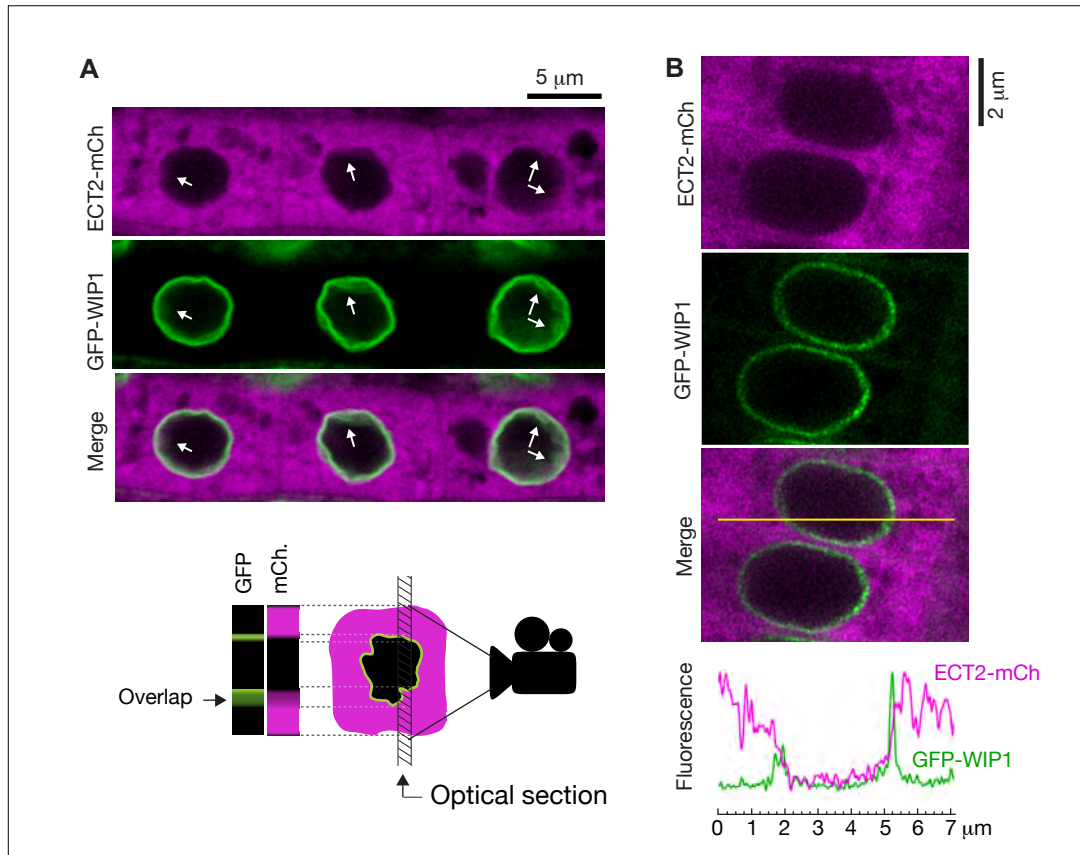

**Figure 6. ECT2 is not in the nucleus.** (A) Standard confocal microscopy of root cells co-expressing *ECT2-mCherry* and *GFP-WIP1*. White arrows indicate areas in which apparent spills of *ECT2-mCherry* signal into the nucleus overlap with blurry *GFP* signal from the nuclear envelope, a sign of not-perpendicularity between the envelope and the optical plane as exemplified on the cartoon at the bottom. (B) Airyscan super-resolution confocal microscopy of root cells as in A. The image is cropped from a larger picture shown in the [figure supplement 1](#). *mCherry* and *GFP* fluorescence signals along the yellow line show absence of *ECT2-mCherry* inside the limits of the *GFP*-labelled nuclear envelope.

**Figure supplement 1.** Super-resolution confocal microscopy of cells co-expressing *ECT2-mCherry* and the nuclear envelope marker *GFP-WIP1*.



301 signal, probably due to lack of perpendicularity between the nuclear envelope and the optical  
302 section in these areas. In such cases, the cytoplasm, nucleus and nuclear envelope may be  
303 contained in the same region of the optical section and thus appear to be overlapping (*Figure 6A,*  
304 *bottom panel*). To verify this interpretation, we inspected our plants with the super-resolution  
305 confocal Airyscan detector (Huff 2015) and, as expected, we did not observe ECT2-mCherry signal  
306 inside the GFP-WIP1-delimited nuclei in any instances (*Figure 6B, Figure 6—figure supplement*  
307 *1B,C*). Based on these analyses, we conclude that ECT2 resides in the cytoplasm and its presence  
308 in the nucleus, if any, may be too transient to be detected by fluorescence microscopy. These  
309 results agree with the lack of evidence for a function of ECT2/3/4 in choice of PAS, and strongly  
310 suggest that the molecular basis for the importance of ECT2/3/4 should be sought in cytoplasmic  
311 properties of their mRNA targets.

312

### 313 ***ECT2/3 targets tend to show reduced abundance upon loss of ECT2/3/4***

314 We next assessed the effect of loss of ECT2/3/4 function on target mRNA abundance, using the  
315 Smart-seq2 data from FACS-sorted root protoplasts described above. Principal component analysis  
316 showed that the three repeats of wild type (*ect2-1/ECT2-mCherry*) were well separated from the  
317 three repeats of mutant (*te234/ECT2<sup>W464A</sup>-mCherry*) along the first principal component (*Figure 7—*  
318 *figure supplement 1A*), indicating that differential gene expression analysis with mutant to wild type  
319 comparison was meaningful. We focused on stringent, permissive and non-ECT2/3 targets in roots  
320 (*Figure 4—figure supplement 1B, Supplementary file 3*), and visualized their differential expression  
321 between mutant and wild type by scatter, volcano and box plots (*Figure 7A-C, Supplementary file*  
322 *5*). These approaches showed that stringent targets have a clear tendency towards down-  
323 regulation upon loss of ECT2/3/4 function. This trend is maintained, but is less pronounced in  
324 permissive targets, and is reversed in non-targets (*Figure 7A-C*). Indeed, of the significantly  
325 differentially expressed stringent ECT2/3 targets, nearly all were down-regulated in the mutant,  
326 while the majority of differentially expressed non-targets were up-regulated compared to wild type  
327 (*Figure 7D*). Furthermore, ECT2/3 targets accounted for more than half of all significantly  
328 downregulated genes, but only about 15% of upregulated genes (*Figure 7E*). In contrast, highly  
329 upregulated genes tended to be non-targets (*Figure 7B, right panel*).

330

### 331 ***Functional groups of differentially expressed genes***

332 To test if these differentially regulated gene sets represented subsets of functionally related genes  
333 within target and non-target groups, we analyzed their potential enrichment of GO terms. This

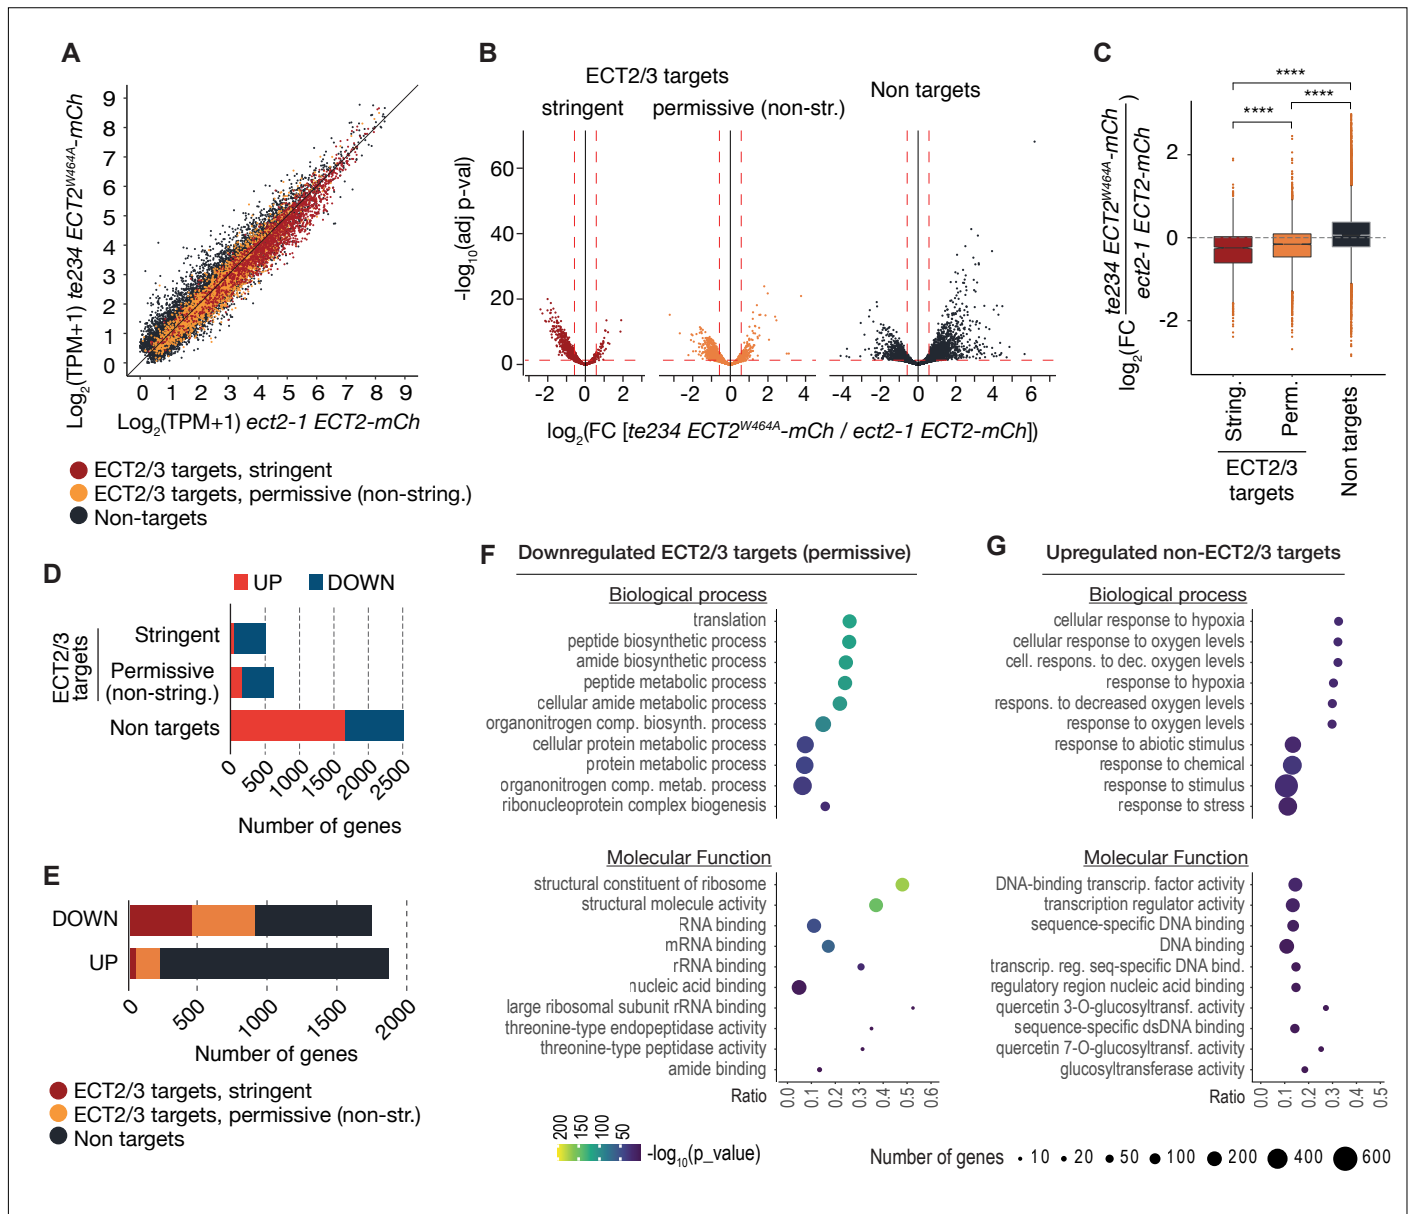

**Figure 7. ECT2/3 targets are generally less abundant in cells without ECT2/3/4 function.** (A) Scatterplot of TPM expression values in Smart-seq2 libraries of root protoplasts expressing ECT2-mCherry in *te234/ECT2<sup>W464A</sup>-mCherry* vs. *ect2-1/ECT2-mCh* samples. (B) Volcano plots reveal genes differentially expressed between the genotypes described in A. (C) Boxplots of  $\log_2$  fold change expression values between *te234/ECT2<sup>W464A</sup>-mCherry* and *ect2-1/ECT2-mCh* samples. (D,E) Bar plots showing the amount of significantly up- and downregulated genes in ECT2/3 targets and non-targets. (F,G) List with the 10 most significantly enriched GO terms among significantly upregulated ECT2/3 targets (permissive set) (F), or downregulated non-targets (G) upon loss of ECT2/3/4 function.

**Figure supplement 1.** ECT2/3 targets are generally less abundant in root tips of *ect2/ect3/ect4* knockout plants.

334 analysis revealed that down-regulated ECT2/3 targets were particularly enriched in genes related to  
335 ribosome biogenesis and translation (*Figure 7F*), while upregulated non-targets were enriched in  
336 “abiotic stress responses” with molecular function “transcription factor” (*Figure 7G*). Because cell  
337 wall digestion required for protoplast isolation is a cellular stress, we tested the trivial possibility that  
338 loss of ECT2/3/4 function renders cells more susceptible to stress, and that such potential hyper-  
339 susceptibility underlies the observed differences of gene expression in ECT2-expressing root  
340 protoplasts. To this end, we isolated RNA from intact root apices of 4-day old plants of Col-0 wild  
341 type and *te234* mutants, and performed mRNA-seq analysis. These results recapitulated the trends  
342 of downregulation of stringent ECT2/3 targets and upregulation of stress-responsive non-targets,  
343 albeit with less pronounced differences than observed in the selected ECT2-expressing cell  
344 populations as expected (*Figure 7—figure supplement 1*). We also noticed that several stress-  
345 inducing and growth-restricting NF-YA-class transcription factors, all repressed by miR169defg,  
346 were upregulated in root tips (*Figure 8A*), and used small RNA-seq to test if activation of the stress  
347 response was visible in the miRNA expression profile. Indeed, the miR169defg family was  
348 specifically repressed in *te234* mutants, and the miR167 family, targeting growth-promoting auxin-  
349 response factors, was clearly upregulated (*Figure 8B*). In addition, the LTR-retrotransposon-  
350 targeting miR845a (Borges et al. 2018) was strongly upregulated. Thus, the stress response  
351 detected in *te234* mutants comprises coherent changes of miRNA and transcription factor  
352 expression. These data confirm that the observed patterns of differential gene expression in  
353 selected protoplasts are genuine and biologically meaningful, and that the selection of ECT2-  
354 expressing cells ensures the most accurate description of differential gene expression resulting  
355 from loss of ECT2/3/4 function. We note that while the differential gene expression analysis  
356 suggests that ECT2/3/4 formally act to increase abundance of their mRNA targets, it does not allow  
357 conclusions to be drawn on how such activation is brought about: a direct stabilizing effect of  
358 ECT2/3/4 binding to their targets is consistent with the observed results, but indirect effects via  
359 transcriptional repression cannot be excluded, especially given the presence of stress-related  
360 transcription factors in the set of up-regulated non-targets.

361

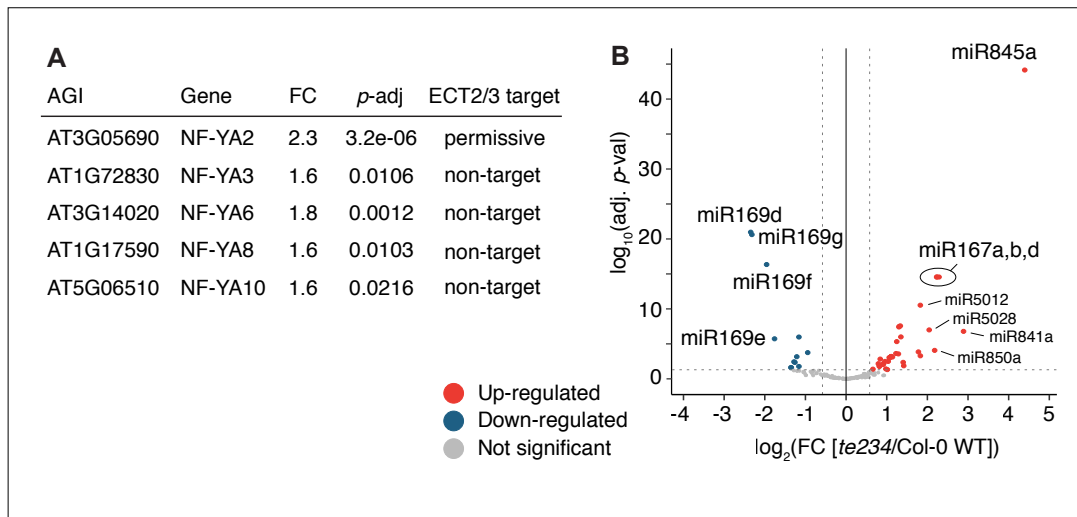

**Figure 8. miRNA profile in root tips of *ect2/ect3/ect4* knockout plants. (A)** Differential expression analysis of *te234* vs. Col-0 WT in 4-day-old root tips shows that expression of several stress-related NF-YA transcription factors (miR169defg targets) is induced in *te234* plants. FC, Fold Change [*te234*/WT]. **(B)** Volcano plot showing miRNAs differentially expressed in *te234* vs. Col-0 WT in 4-day-old root tips.

## 362 Discussion

363 Our identification and comparative analyses of mRNA targets of ECT2 (*accompanying manuscript*)  
364 and ECT3, and study of their behavior in terms of abundance and use of alternative  
365 polyadenylation in cell populations devoid of ECT2/3/4 activity allow us to draw two major  
366 conclusions. First, combining the overlapping expression patterns of ECT2 and ECT3, their formal  
367 genetic redundancy (Arribas-Hernández et al. 2018; Arribas-Hernández et al. 2020), their  
368 overlapping target sets, and the signatures of redundant target interaction derived from  
369 HyperTRIBE in single and triple *ect* mutant backgrounds, we conclude that many target mRNAs  
370 can bind to either ECT2 or ECT3 with similar consequences; i.e. ECT2 and ECT3 can exhibit  
371 redundant function *sensu stricto*, not just the ability to replace function in the absence of the other  
372 protein. Second, ECT2 is not nuclear, and ECT2/3/4 do not appreciably affect alternative  
373 polyadenylation in their direct mRNA targets. It is important to note that this conclusion on  
374 ECT2/3/4 does not extend to m<sup>6</sup>A altogether. Polyadenylation and transcription termination are  
375 clearly influenced by m<sup>6</sup>A in plants, as shown by studies of mutants in core N<sup>6</sup>-adenosine  
376 methyltransferase components VIR and FIP37. In *vir-1* mutants, a tendency to use proximal  
377 alternative PASs in m<sup>6</sup>A-targets is prominent (Parker et al. 2020), and in *fip37* mutants, several  
378 cases of defective transcription termination causing production of chimeric transcripts were noted  
379 (Pontier et al. 2019). In the latter case, m<sup>6</sup>A recognition by the YTHDC-containing nuclear subunit  
380 of the Cleavage and Polyadenylation Specificity Factor CPSF30 was demonstrated to be required  
381 for regular transcription termination, and subsequent studies of CPSF30, including of mutants  
382 specifically defective in m<sup>6</sup>A-binding, also indicated its role in mediating m<sup>6</sup>A-dependent alternative  
383 polyadenylation (Hou et al. 2021; Song et al. 2021). Thus, m<sup>6</sup>A does affect 3'-end formation of  
384 methylated pre-mRNAs in plants, but this process involves the nuclear CPSF30 which contains a  
385 YTHDC domain only in plants, rather than the cytoplasmic YTHDF protein ECT2.

386 The immediate implication of the conclusions that ECT2 does not act in the nucleus and  
387 does not influence alternative polyadenylation is that the conceptual framework for m<sup>6</sup>A-YTHDF  
388 action established mostly through studies in mammalian cell culture does extend to plants: m<sup>6</sup>A is  
389 installed by a nuclear methyltransferase complex (Zhong et al. 2008; Shen et al. 2016; Růžička et  
390 al. 2017), probably coupled to RNA Polymerase II transcription (Bhat et al. 2020), and YTHDF-  
391 mediated regulation of transcripts carrying the m<sup>6</sup>A mark takes place in the cytoplasm. Then, what  
392 is the molecular effect of ECT2/ECT3-binding to target mRNAs? Clearly, lack of ECT2/3/4 results in  
393 decreased abundance of direct targets. This result is in line with the lower accumulation of m<sup>6</sup>A-  
394 containing transcripts observed in plants partially depleted of m<sup>6</sup>A (Shen et al. 2016; Anderson et

395 al. 2018; Parker et al. 2020) and in the *ect2-1* knockout line (Wei et al. 2018) compared to wild type  
396 plants. However, differential expression analysis of ubiquitously expressed targets performed with  
397 RNA from entire plants is not easy to interpret when the regulatory process subject to study is  
398 located only in well-defined cell populations of meristematic tissues (Zhong et al. 2008; Arribas-  
399 Hernández et al. 2018; Arribas-Hernández et al. 2020). The problem is even more acute when the  
400 tissue composition of wild type and mutant individuals to be compared is different due to the  
401 developmental delay of the m<sup>6</sup>A-deficient lines. Lastly, some of the previous studies of differential  
402 gene expression also revealed a number of m<sup>6</sup>A-containing transcripts with increased abundance  
403 in m<sup>6</sup>A-deficient mutants (Shen et al. 2016; Anderson et al. 2018), of which some were proposed to  
404 be of importance for the observed phenotype (Shen et al. 2016). Thus, the studies on differential  
405 gene expression in m<sup>6</sup>A-deficient mutants compared to wild type published thus far do not allow  
406 clear conclusions on the consequence of loss of m<sup>6</sup>A (or a reader protein) for target mRNA  
407 accumulation to be drawn (Arribas-Hernández and Brodersen 2020). In contrast, our experimental  
408 setup, using a tissue with comparable cell-type composition in wild type and mutant plants and  
409 extracting RNA only from the cells in which target regulation by ECT2/3/4 takes place, establishes  
410 that targets generally have decreased abundance upon loss of ECT2/3/4.

411 The present study does not, however, elucidate the mechanisms involved in target  
412 regulation, because it does not directly measure target mRNA synthesis and degradation rates. It is  
413 possible that the reduced target mRNA accumulation in *ect2/3/4* mutant cells is exclusively a direct  
414 consequence of ECT2/3/4 function at the post-transcriptional level, for example mRNA stabilization  
415 by protection from endonucleolysis as previously suggested (Anderson et al. 2018). We cannot at  
416 present exclude, however, that more indirect effects also play a role, perhaps related to  
417 transcriptional repression of ECT2/3/4 targets via stress responses activated upon loss of ECT2/3/4  
418 function. We anticipate that clear answers to this question must await development of tools for  
419 conditional inactivation of ECT2/3 function, such that consequences for mRNA target fate can be  
420 studied immediately after loss of ECT2/3 binding. We also note that the constitutive stress  
421 response activation is consistent with the stunted phenotype of *te234* mutants (Arribas-Hernández  
422 et al. 2018; Arribas-Hernández et al. 2020). Thus, disentangling direct effects of ECT2/3/4 on  
423 growth via mRNA target regulation from possible indirect effects arising from stress response  
424 activation in knockout mutants will be of major importance in future studies.

425

## 426 **Methods**

427 All data analyses were carried out using TAIR 10 as the reference genome and Araport11 as the  
428 reference transcriptome. Unless otherwise stated, data analyses were performed in R  
429 (<https://www.R-project.org/>) and plots generated using either base R or ggplot2.  
430 (<https://ggplot2.tidyverse.org>).

431

### 432 *Plant material*

433 All lines employed in this study are in the *Arabidopsis thaliana* Col-0 ecotype. The mutant alleles or  
434 their combinations: *ect2-1* (SALK\_002225) (Arribas-Hernández et al. 2018; Scutenaire et al. 2018;  
435 Wei et al. 2018), *ect3-1* (SALKseq\_63401), *ect4-2* (GK\_241H02), and *ect2-1/ect3-1/ect4-2* (*te234*)  
436 (Arribas-Hernández et al. 2018) have been previously described. The transgenic lines *ect2-1*  
437 *ECT2-FLAG-ADAR* and *te234 ECT2-FLAG-ADAR* (*accompanying manuscript*), *GFP:WIP1* (Xu et  
438 al. 2007) and those expressing *ECT2pro:ECT2-mCherry-ECT2ter* and *ECT2pro:ECT2<sup>W464A</sup>-*  
439 *mCherry-ECT2ter* (Arribas-Hernández et al. 2018; Arribas-Hernández et al. 2020) have also been  
440 described. Plants co-expressing *ECT2-mCherry* and *GFP-WIP1* used for fluorescence microscopy  
441 were the F1 progeny of a genetic cross between *GFP-WIP1* and *ECT2-mCherry*-expressing plants.

442

### 443 *Growth conditions*

444 Seeds were surface-sterilized by 2-min incubation in 70% EtOH plus 10 min in [1.5% NaOCl, 0.05%  
445 Tween-20], two H<sub>2</sub>O washes, and 2-5 days of stratification at 4°C in darkness. To harvest tissue for  
446 HyperTRIBE experiments, and for the PASs and differential expression analyses, we grew  
447 seedlings in vertically disposed plates with Murashige and Skoog (MS)-agar medium (4.4 g/L MS,  
448 10 g/L sucrose, 10 g/L agar; pH 5.7) at 20°C, receiving ~70 μmol m<sup>-2</sup> s<sup>-1</sup> of light in a 16 hr light/8 hr  
449 dark cycle. Conditions were identical to those used for ECT2-HyperTRIBE and iCLIP experiments  
450 (*accompanying manuscript*). To assess phenotypes of the lines employed for ECT3-HT, we grew  
451 seedlings in horizontal MS plates (4.4 g/L MS, 10 g/L sucrose, 8 g/L agar; pH 5.7) at 21°C in the  
452 same light regime, transferred to soil ~8 days after germination, and maintained in Percival  
453 incubators also under long day conditions.

454

### 455 *Definitions of experiment, biological replicates and technical replicates*

456 We use the term “biological replicate” in the following way: Plants were grown at the same time,  
457 under the same conditions, but in separate plates. Each sample replicate contains pools of  
458 seedlings prepared in such a way that no two replicates contains seedlings grown on the same

459 plates. This sampling ensures that plate-to-plate variation in growth conditions, if any, will have an  
460 effect on measurements of gene expression within a single genotype, and hence minimize the risk  
461 that any differences due to such variation are called as significant in comparisons between  
462 genotypes.

463 “Technical replicates” are understood to be independently conducted measurements using the  
464 same technique on the same biological material (e.g. on one biological replicate as defined above).  
465 Technical replicates were not carried out in this study, and the term “replicate” refers to biological  
466 replicate as defined above.

467 In our definition, an “experiment” results in generation and comparison of measurements arising  
468 from multiple biological replicates of different biological entities, in the present case often  
469 *Arabidopsis* seedlings differing in genotype with respect to the genes *ECT2*, *ECT3* and *ECT4*.  
470 Thus, repetition of an experiment in our definition entails generation and analysis of the required  
471 biological replicates at different points in time.

472

#### 473 *Generation of transgenic lines for ECT3-HyperTRIBES*

474 We generated lines expressing *ECT3pro:ECT3-FLAG-ADAR-ECT3ter* and *ECT3pro:FLAG-ADAR-*  
475 *ECT3ter* by USER cloning (Bitinaite and Nichols 2009) and agrobacterium-mediated transformation  
476 in the same way as for the *ECT2* equivalents ([accompanying manuscript](#)). Primer sequences are  
477 detailed in [Table 1](#). We selected 5 independent lines of each type based on segregation studies (to  
478 isolate single T-DNA insertions), phenotypic complementation (in the *te234* background) and  
479 transgene expression levels assessed by FLAG western blot.

480

#### 481 *HyperTRIBES*

482 The HyperTRIBES experiments were performed once, using 5 biological replicates (independent  
483 lines) for each of the groups (genotypes) used. Growth conditions and experimental procedures  
484 were identical for all the groups compared in this study. Root and aerial tissue were dissected from  
485 the same plants in all cases. Tissue dissection, RNA extraction and library preparation were done  
486 as described for *ECT2-HyperTRIBES* in the [accompanying manuscript](#). Briefly, we Trizol-extracted  
487 total RNA from manually dissected root tips and apices (removing cotyledons) of 10-day-old T2  
488 seedlings. After mRNA enrichment with oligo(dT) beads (18-mers), Illumina mRNA-Seq libraries  
489 were then prepared by Novogene.

490

#### 491 *Analysis of HyperTRIBES data*



492 Significant differentially edited sites between *ECT3-FLAG-ADAR* (fusion) and *FLAG-ADAR* (control)  
493 samples were called according to our hyperTRIBER pipeline ([https://github.com/sarah-](https://github.com/sarah-ku/hyperTRIBER)  
494 [ku/hyperTRIBER](https://github.com/sarah-ku/hyperTRIBER)) as described for ECT2-HyperTRIBE in the *accompanying manuscript*, without  
495 removal of any sample.

496 For the analysis of editing sites by ECT2/3-FLAG-ADAR in triple (*te234*) vs. single (either *ect2-1* or  
497 *ect3-1*) mutant background, the hyperTRIBER pipeline was run between the two types of samples  
498 without taking into account the free ADAR controls, in order to detect positions edited preferentially  
499 in one or the other background. To account for low power as a result of high variance in editing  
500 proportions due to transgene expression differences across samples, scaled ADAR abundance  
501 was treated as an extra co-variate in the model. This resulted in enriched sensitivity to specifically  
502 call A-to-G positions, which were subsequently considered as significant if they had an adjusted  $p$ -  
503 value  $< 0.1$  and an absolute  $\log_2(\text{fold change}) > 0.25$ . We also required positions to be a  
504 significantly edited site in at least one of the single or triple mutant set ups against the free FLAG-  
505 ADAR control samples.

506

#### 507 *Comparison with root single cell data*

508 The expression matrix based on a total of 4727 individual cells from scRNA-seq in roots was  
509 downloaded from Denyer et al. (2019), together with extensive lists of marker genes associated  
510 with 15 clusters annotated to cell types in roots. To calculate the proportion of markers at target  
511 genes: for each of the 15 clusters, the proportion of marker genes that are ECT2 or ECT3 targets  
512 (based on ECT2-HT and ECT3-HT respectively in roots) was calculated. Proportions were then  
513 overlaid onto a t-SNE diagram (Denyer et al. 2019), according to relevant clusters of cells.

514

#### 515 *Preparation and sorting of protoplasts*

516 We harvested roots from 5-day-old T4 seedlings grown on vertical square plates (20 plates with 4  
517 rows of densely spotted seeds in each plate per line/replicate) to digest in 20 mL of protoplasting  
518 solution (20 mM MES, 0.4 M D-Mannitol, 20 mM KCl, 1.25% w/v Cellulase, 0.3% Macerozyme,  
519 0.1% w/v BSA, 10 mM CaCl<sub>2</sub>, 5mM  $\beta$ -mercaptoethanol; pH 5.7), following Benfey's lab procedure  
520 (Birnbaum et al. 2005; Bargmann and Birnbaum 2010). After the 75 min of incubation at 27°C with  
521 gentle agitation, we filtered the cell-suspensions through a 40  $\mu\text{m}$  strainer and pelleted cells by  
522 centrifugation at 500  $g$  for 10 min at room temperature in a swinging-bucket centrifuge. Pellets were  
523 gently resuspended in 400  $\mu\text{L}$  of protoplasting solution for direct sorting in a FACSAriaIII cytometer.

524 The flow stream was adjusted to 20 psi sheath pressure with a 100 µm nozzle aperture. Sorted  
525 cells were collected into RTL buffer supplemented with 40 mM DTT (3.5 vol of buffer per volume of  
526 cell suspension) and lysed by vortexing. The protoplast extracts were flash-frozen on dry ice until  
527 extraction with the RNeasy Plus Micro kit (QIAGEN) following the manufacturer's instructions. The  
528 yield was ~300.000 cells in a volume of 1.5 mL (per sample). Samples were harvested, prepared  
529 and sorted with a 15 min. lapse between them to account for sorting time. In that way, every  
530 sample was processed in the same amount of time (~2 h from the start of harvesting to sorting). To  
531 prevent any possible bias, the samples of each genotype (3+3) were alternated during all the  
532 processing.

533

#### 534 *Smart-seq2*

535 Smart-seq2 libraries were generated according to Picelli *et al.* (2013) using the Illumina DNA  
536 Nextera Flex kit from total RNA extracted with the RNeasy Plus Micro kit (QIAGEN) from FACS-  
537 sorted root protoplasts (Birnbaum *et al.* 2005). The libraries were sequenced in PE75 mode on an  
538 Illumina NextSeq550 sequencer. Nextera transposase adapters were trimmed from all reads using  
539 Cutadapt.

540

#### 541 *Polyadenylation Site Analysis*

542 Smart-seq2 reads with at least 9 3'-terminal A nucleotides or 5'-terminal T nucleotides were  
543 labelled as putative poly(A)-containing reads and the oligo-A/T sequences were removed with a  
544 maximum allowed mismatch rate of 6%. All putative poly(A)-containing reads with a length >20 and  
545 a mean quality score >25 after trimming were retained along with their mate pair and mapped to the  
546 *Arabidopsis thaliana* TAIR10 genome using STAR with the following parameters:

```
547 --alignIntronMax 5000 --alignMatesGapMax 5500 --outFilterMatchNmin 20  
548 --alignSJDBoverhangMin 1 --outFilterMismatchNmax 5  
549 --outFilterMismatchNoverLmax .05 --outFilterType BySJout  
550 --outFilterIntronMotifs RemoveNoncanonicalUnannotated
```

551

552 Putative poly(A)-containing reads that mapped to the genome were filtered for false positives by  
553 examining the adjacent nucleotides in the genome: reads were removed if the putative poly(A) site  
554 was immediately upstream of a 15nt region that is at least 80% purines (which are likely sites of  
555 oligo-dT mispriming). All putative poly(A)-containing reads not filtered in this way were retained as  
556 poly(A) sites and were counted for each position in the genome based on the most 3' nucleotide of  
557 each read (allowing 3'-terminal mismatches).

558 Polyadenylation site clusters (PACs) were identified using a modification of the nanoPARE analysis

559 pipeline (<https://github.com/Gregor-Mendel-Institute/nanoPARE>) (Schon et al. 2018). Briefly,  
560 reads from the samples above that did not contain untemplated poly(A) tails were mapped to the  
561 genome and used as a negative control of “gene body reads”. Then, subtractive kernel density  
562 estimation was performed for each sample using *endGraph.sh* with default settings to produce a  
563 BED file for each sample containing poly(A) site clusters. As a final filter against oligo-dT  
564 mispriming events, the reads removed as false positives in the previous step that overlap with each  
565 cluster were counted. If the cluster contained more filtered signal than unfiltered signal, the entire  
566 cluster was considered a false positive cluster. Clusters were retained if an overlapping site was  
567 identified in at least 2 of the 3 replicates of both *ect2-1 ECT2-mCherry* and *te234 ECT2<sup>W464A</sup>-*  
568 *mCherry* genotypes. These two sets of clusters were merged using *bedtools merge*. Clusters  
569 mapping to the mitochondrial and chloroplast genome and the 2 rDNA loci were discarded, and the  
570 rest were retained for quantification.

571

#### 572 *mRNA-Seq and small RNA-Seq from root tips*

573 Total RNA purified from manually dissected root tips of 4-day-old plants (using the same growing  
574 conditions and methodology as for the HyperTRIBE lines) was used for preparation of Illumina  
575 mRNA-Seq (same methodology as for HyperTRIBE) and small RNA-Seq libraries (NEBNext small  
576 RNA library prep set). The experiment was performed once, using 3 biological replicates for mRNA-  
577 Seq, and 2 for small RNA-Seq.

578

#### 579 *Differential expression analysis (mRNA and miRNAs)*

580 Differential gene expression analysis of mRNA was performed from processed and quantified  
581 Smart-seq2 or RNA-Seq data using DESeq2 (Love et al. 2014), for all genes with at least 1 TPM in  
582 all six samples (three biological replicates of the two types) and a total sum of at least 5 TPM.  
583 Significantly differentially expressed genes (FDR < 0.05) were considered to be upregulated in the  
584 mutants if the fold change between mutant and wild type samples was higher than 1.5, or  
585 downregulated if lower than 1/1.5.

586 For small RNA-Seq, raw reads were trimmed with cutadapt v3.4 (Kechin et al. 2017) to  
587 lengths of 18-28 nt, and mapped to the *Arabidopsis* genome using STAR v2.6.0a (Dobin et al.  
588 2013) with genome indexes built on the *Araport11\_GTF\_genes\_transposons.Mar202021.gtf*  
589 annotation. Mapped reads were counted using featureCounts v2.0.1 (Liao et al. 2014). Genes with  
590 less than 1 RPM in all four samples (two biological replicates of the two types) were excluded from  
591 the analysis. Differential expression analysis was conducted using DESeq2 version 1.28.1 (Love et

592 al. 2014) on the resulting matrix. Genes with adjusted p-value (FDR) lower or equal to 0.05 were  
593 considered significantly differentially expressed, and upregulated in *te234* mutants if the fold  
594 change between *te234* and *Col-0 WT* samples was higher than 1.5, or downregulated if lower than  
595 1/1.5.

596

#### 597 *GO Term enrichment analysis*

598 The functional enrichment analysis was carried out using the R package gprofiler2 version 0.2.0  
599 (Raudvere et al. 2019).

600

#### 601 *Fluorescence Microscopy*

602 Entire root tips growing inside MS-agar plates were imaged with a Leica MZ16 F stereomicroscope  
603 with a Sony  $\alpha$ 6000 camera. Standard confocal fluorescence microscopy images of cells in root  
604 meristems were acquired with a Zeiss LSM700 confocal microscope as described in Arribas-  
605 Hernández et al. (2018) using ~7-day-old seedlings grown on MS-agar plates and freshly mounted  
606 in water. For super-resolution fluorescence microscopy, we used a Zeiss LSM900 equipped with  
607 the Airyscan detector (Huff 2015). Fluorescence intensity plots were obtained with the tool “Plot  
608 Profile” of the image-processing package ImageJ (Schindelin et al. 2012).

609

610 **Data Access**

611 *Accession numbers*

612 The raw and processed data for ECT3-HyperTRIBER, Smart-seq2 from root protoplasts and RNA-  
613 seq from root tips have been deposited in the European Nucleotide Archive (ENA) at EMBL-EBI  
614 under the accession number PRJEB44359.

615

616 *Code availability*

617 The code for running the hyperTRIBER pipeline is available at [https://github.com/sarah-](https://github.com/sarah-ku/targets_arabidopsis)  
618 [ku/targets\\_arabidopsis](https://github.com/sarah-ku/targets_arabidopsis), and the nanoPARE pipeline for PAS analysis can be found at  
619 <https://github.com/Gregor-Mendel-Institute/nanoPARE>.

620

621 **Acknowledgements**

622 We thank Lena Bjørn Johansson and Phillip Andersen for technical assistance in the construction  
623 of transgenic lines, Emilie Oksbjerg for preparing and sequencing small RNA libraries, Theo  
624 Bølsterli, René Hvidberg Petersen and their teams for plant care, and Anna Fossum and Rajesh  
625 Somasundaram for their assistance with FACS. Kim Rewitz and Kenneth Halberg are thanked for  
626 assistance with Airyscan microscopy. We acknowledge Mathias Tankmar, Alexander J.H.  
627 Andersen and Freja Asmussen for experimental support, and Tom Denyer and Marja Timmermans  
628 for their input and support in the analyses of ECT2/3 expression and target enrichment in their  
629 scRNAseq data. We are grateful to Norman R. Groves and Iris Meier for the kind donation of GFP-  
630 WIP1 seeds. This work was supported by a Consolidator Grant from the European Research  
631 Council (PATHORISC, ERC-2016-COG 726417) and a Research Grant from the Independent  
632 Research Fund Denmark (9040-00409B) to P.B.; a Starting Grant from the European Research  
633 Council (638173) and a Sapere Aude Starting Grant from the Independent Research Fund  
634 Denmark (6108-00038B) to R.A.; and a European Research Council under the European Union's  
635 Horizon 2020 Research and Innovation Program grant 63788 to M.N.

636

637 **Author Contributions**

638 P.B. and L.A.-H. designed and coordinated the study. L.A.-H. built the biological material for ECT3-  
639 HT. S.R. called edited sites to define ECT3-HT target sets and compared the ECT2 and ECT3-HT  
640 datasets. L.A.-H. produced protoplast and root tip RNA samples, B.E. generated Smart-seq2  
641 libraries, M.S. analyzed poly(A) sites, and C.P. performed differential expression of mRNA and  
642 miRNA, and GO-term enrichment analyses. M.N. supervised work related to PAS mapping. P.B.  
643 and L.A.-H. wrote the manuscript with input from all authors.

644 **References**

- 645  
646 Anderson SJ, Kramer MC, Gosai SJ, Yu X, Vandivier LE, Nelson ADL, Anderson ZD, Beilstein MA,  
647 Fray RG, Lyons E et al. 2018. N(6)-Methyladenosine Inhibits Local Ribonucleolytic Cleavage to  
648 Stabilize mRNAs in Arabidopsis. *Cell Rep* **25**: 1146-1157.
- 649 Arribas-Hernández L, Bressendorff S, Hansen MH, Poulsen C, Erdmann S, Brodersen P. 2018. An  
650 m6A-YTH Module Controls Developmental Timing and Morphogenesis in Arabidopsis. *Plant Cell*  
651 **30**: 952-967.
- 652 Arribas-Hernández L, Brodersen P. 2020. Occurrence and functions of m6A and other covalent  
653 modifications in plant mRNA. *Plant Physiol* **182**: 79-96.
- 654 Arribas-Hernández L, Simonini S, Hansen MH, Paredes EB, Bressendorff S, Dong Y, Østergaard L,  
655 Brodersen P. 2020. Recurrent requirement for the m6A-ECT2/ECT3/ECT4 axis in the control of  
656 cell proliferation during plant organogenesis. *Development* **147**: dev189134.
- 657 Balacco DL, Soller M. 2019. The m6A Writer: Rise of a Machine for Growing Tasks. *Biochemistry*  
658 **58**: 363-378.
- 659 Bargmann BOR, Birnbaum KD. 2010. Fluorescence Activated Cell Sorting of Plant Protoplasts.  
660 *JoVE* doi:doi:10.3791/1673: e1673.
- 661 Bhat SS, Bielewicz D, Gulanicz T, Bodi Z, Yu X, Anderson SJ, Szewc L, Bajczyk M, Dolata J,  
662 Grzelak N et al. 2020. mRNA adenosine methylase (MTA) deposits m<sup>6</sup>A on  
663 pri-miRNAs to modulate miRNA biogenesis in Arabidopsis thaliana. *Proc Natl*  
664 *Acad Sci USA* **117**: 21785.
- 665 Birnbaum K, Jung JW, Wang JY, Lambert GM, Hirst JA, Galbraith DW, Benfey PN. 2005. Cell  
666 type-specific expression profiling in plants via cell sorting of protoplasts from fluorescent reporter  
667 lines. *Nat Meth* **2**: 615-619.
- 668 Bitinaite J, Nichols NM. 2009. DNA cloning and engineering by uracil excision. *Curr Protoc Mol Biol*  
669 **Chapter 3**: Unit 3 21.
- 670 Borges F, Parent J-S, van Ex F, Wolff P, Martínez G, Köhler C, Martienssen RA. 2018.  
671 Transposon-derived small RNAs triggered by miR845 mediate genome dosage response in  
672 Arabidopsis. *Nat Genet* **50**: 186-192.
- 673 Denyer T, Ma X, Klesen S, Scacchi E, Nieselt K, Timmermans MCP. 2019. Spatiotemporal  
674 Developmental Trajectories in the Arabidopsis Root Revealed Using High-Throughput Single-Cell  
675 RNA Sequencing. *Dev Cell* **48**: 840-852.e845.
- 676 Dobin A, Davis CA, Schlesinger F, Drenkow J, Zaleski C, Jha S, Batut P, Chaisson M, Gingeras  
677 TR. 2013. STAR: ultrafast universal RNA-seq aligner. *Bioinformatics* **29**: 15-21.
- 678 Dominissini D, Moshitch-Moshkovitz S, Schwartz S, Salmon-Divon M, Ungar L, Osenberg S,  
679 Cesarkas K, Jacob-Hirsch J, Amariglio N, Kupiec M et al. 2012. Topology of the human and  
680 mouse m6A RNA methylomes revealed by m6A-seq. *Nature* **485**: 201-206.

- 681 Hou Y, Sun J, Wu B, Gao Y, Nie H, Nie Z, Quan S, Wang Y, Cao X, Li S. 2021. CPSF30-L-  
682 mediated recognition of mRNA m6A modification controls alternative polyadenylation of nitrate  
683 signaling-related gene transcripts in Arabidopsis. *Molecular Plant* doi:10.1016/j.molp.2021.01.013.
- 684 Huff J. 2015. The Airyscan detector from ZEISS: confocal imaging with improved signal-to-noise  
685 ratio and super-resolution. *Nat Meth* **12**: i-ii.
- 686 Kechin A, Boyarskikh U, Kel A, Filipenko M. 2017. cutPrimers: A New Tool for Accurate Cutting of  
687 Primers from Reads of Targeted Next Generation Sequencing. *J Comput Biol* **24**: 1138-1143.
- 688 König J, Zarnack K, Rot G, Curk T, Kayikci M, Zupan B, Turner DJ, Luscombe NM, Ule J. 2010.  
689 iCLIP reveals the function of hnRNP particles in splicing at individual nucleotide resolution. *Nat*  
690 *Struct Mol Biol* **17**: 909-915.
- 691 Kontur C, Jeong M, Cifuentes D, Giraldez AJ. 2020. Ythdf m6A Readers Function Redundantly  
692 during Zebrafish Development. *Cell Rep* **33**: 108598.
- 693 Lasman L, Krupalnik V, Viukov S, Mor N, Aguilera-Castrejon A, Schneir D, Bayerl J, Mizrahi O,  
694 Peles S, Tawil S et al. 2020. Context-dependent functional compensation between Ythdf m6A  
695 reader proteins. *Genes Dev* **34**: 1373-1391.
- 696 Li A, Chen Y-S, Ping X-L, Yang X, Xiao W, Yang Y, Sun H-Y, Zhu Q, Baidya P, Wang X et al. 2017.  
697 Cytoplasmic m6A reader YTHDF3 promotes mRNA translation. *Cell Res* **27**: 444.
- 698 Li D, Zhang H, Hong Y, Huang L, Li X, Zhang Y, Ouyang Z, Song F. 2014a. Genome-wide  
699 identification, biochemical characterization, and expression analyses of the YTH domain-  
700 containing RNA-binding protein family in Arabidopsis and rice. *Plant Mol Biol Report* **32**: 1169-  
701 1186.
- 702 Li F, Zhao D, Wu J, Shi Y. 2014b. Structure of the YTH domain of human YTHDF2 in complex with  
703 an m6A mononucleotide reveals an aromatic cage for m6A recognition. *Cell Res* **24**: 1490-1492.
- 704 Li M-W, Zhou L, Lam H-M. 2015. Paraformaldehyde Fixation May Lead to Misinterpretation of the  
705 Subcellular Localization of Plant High Mobility Group Box Proteins. *PLOS ONE* **10**: e0135033.
- 706 Liao Y, Smyth GK, Shi W. 2014. featureCounts: an efficient general purpose program for assigning  
707 sequence reads to genomic features. *Bioinformatics* **30**: 923-930.
- 708 Love MI, Huber W, Anders S. 2014. Moderated estimation of fold change and dispersion for RNA-  
709 seq data with DESeq2. *Genome biology* **15**: 550.
- 710 Luo S, Tong L. 2014. Molecular basis for the recognition of methylated adenines in RNA by the  
711 eukaryotic YTH domain. *Proc Natl Acad Sci USA* **111**: 13834-13839.
- 712 Ma X, Denyer T, Timmermans MCP. 2020. PscB: A Browser to Explore Plant Single Cell RNA-  
713 Sequencing Data Sets1[OPEN]. *Plant Physiol* **183**: 464-467.
- 714 McMahon Aoife C, Rahman R, Jin H, Shen James L, Fieldsend A, Luo W, Rosbash M. 2016.  
715 TRIBE: Hijacking an RNA-Editing Enzyme to Identify Cell-Specific Targets of RNA-Binding  
716 Proteins. *Cell* **165**: 742-753.

- 717 Parker MT, Knop K, Sherwood AV, Schurch NJ, Mackinnon K, Gould PD, Hall AJW, Barton GJ,  
718 Simpson GG. 2020. Nanopore direct RNA sequencing maps the complexity of Arabidopsis mRNA  
719 processing and m6A modification. *eLife* **9**: e49658.
- 720 Patil DP, Pickering BF, Jaffrey SR. 2018. Reading m6A in the Transcriptome: m6A-Binding  
721 Proteins. *Trends Cell Biol* **28**: 113-127.
- 722 Picelli S, Björklund ÅK, Faridani OR, Sagasser S, Winberg G, Sandberg R. 2013. Smart-seq2 for  
723 sensitive full-length transcriptome profiling in single cells. *Nat Meth* **10**: 1096-1098.
- 724 Pontier D, Picart C, El Baidouri M, Roudier F, Xu T, Lahmy S, Llauro C, Azevedo J, Laudie M,  
725 Attina A et al. 2019. The m6A pathway protects the transcriptome integrity by restricting RNA  
726 chimera formation in plants. *Life Science Alliance* **2**: e201900393.
- 727 Raudvere U, Kolberg L, Kuzmin I, Arak T, Adler P, Peterson H, Vilo J. 2019. g:Profiler: a web  
728 server for functional enrichment analysis and conversions of gene lists (2019 update). *Nucleic  
729 Acids Res* **47**: W191-W198.
- 730 Růžička K, Zhang M, Campilho A, Bodi Z, Kashif M, Saleh M, Eeckhout D, El-Showk S, Li H, Zhong  
731 S et al. 2017. Identification of factors required for m6A mRNA methylation in Arabidopsis reveals  
732 a role for the conserved E3 ubiquitin ligase HAKAI. *New Phytol* **215**: 157-172.
- 733 Schindelin J, Arganda-Carreras I, Frise E, Kaynig V, Longair M, Pietzsch T, Preibisch S, Rueden C,  
734 Saalfeld S, Schmid B et al. 2012. Fiji: an open-source platform for biological-image analysis. *Nat  
735 Meth* **9**: 676-682.
- 736 Schon MA, Kellner MJ, Plotnikova A, Hofmann F, Nodine MD. 2018. NanoPARE: parallel analysis  
737 of RNA 5' ends from low-input RNA. *Genome Res* **28**: 1931-1942.
- 738 Scutenaire J, Deragon J-M, Jean V, Benhamed M, Raynaud C, Favory J-J, Merret R, Bousquet-  
739 Antonelli C. 2018. The YTH Domain Protein ECT2 Is an m6A Reader Required for Normal  
740 Trichome Branching in Arabidopsis. *Plant Cell* **30**: 986-1005.
- 741 Shen L, Liang Z, Gu X, Chen Y, Teo Zhi Wei N, Hou X, Cai Weiling M, Dedon Peter C, Liu L, Yu H.  
742 2016. N6-methyladenosine RNA modification regulates shoot stem cell fate in Arabidopsis. *Dev  
743 Cell* **38**: 186-200.
- 744 Sherstnev A, Duc C, Cole C, Zacharaki V, Hornyik C, Ozsolak F, Milos PM, Barton GJ, Simpson  
745 GG. 2012. Direct sequencing of Arabidopsis thaliana RNA reveals patterns of cleavage and  
746 polyadenylation. *Nat Struct Mol Biol* **19**: 845-852.
- 747 Shi H, Wang X, Lu Z, Zhao BS, Ma H, Hsu PJ, Liu C, He C. 2017. YTHDF3 facilitates translation  
748 and decay of N6-methyladenosine-modified RNA. *Cell Res* **27**: 315-328.
- 749 Song P, Yang J, Wang C, Lu Q, Shi L, Tayier S, Jia G. 2021. Arabidopsis N6methyladenosine  
750 reader CPSF30-L recognizes FUE signals to control polyadenylation site choice in liquid-like  
751 nuclear bodies. *Molecular Plant* doi:10.1016/j.molp.2021.01.014.
- 752 Stoilov P, Rafalska I, Stamm S. 2002. YTH: a new domain in nuclear proteins. *Trends Biochem Sci*  
753 **27**: 495-497.



- 754 Tanious FA, Veal JM, Buczak H, Ratmeyer LS, Wilson WD. 1992. DAPI (4',6-diamidino-2-  
755 phenylindole) binds differently to DNA and RNA: minor-groove binding at AT sites and  
756 intercalation at AU sites. *Biochemistry* **31**: 3103-3112.
- 757 Theler D, Dominguez C, Blatter M, Boudet J, Allain FH. 2014. Solution structure of the YTH domain  
758 in complex with N6-methyladenosine RNA: a reader of methylated RNA. *Nucleic Acids Res* **42**:  
759 13911-13919.
- 760 Wang X, Lu Z, Gomez A, Hon GC, Yue Y, Han D, Fu Y, Parisien M, Dai Q, Jia G et al. 2014. N6-  
761 methyladenosine-dependent regulation of messenger RNA stability. *Nature* **505**: 117-120.
- 762 Wang X, Zhao Boxuan S, Roundtree Ian A, Lu Z, Han D, Ma H, Weng X, Chen K, Shi H, He C.  
763 2015. N6-methyladenosine modulates messenger RNA translation efficiency. *Cell* **161**: 1388-  
764 1399.
- 765 Wei L-H, Song P, Wang Y, Lu Z, Tang Q, Yu Q, Xiao Y, Zhang X, Duan H-C, Jia G. 2018. The m6A  
766 Reader ECT2 Controls Trichome Morphology by Affecting mRNA Stability in Arabidopsis. *Plant*  
767 *Cell* **30**: 968-985.
- 768 Worpenberg L, Paolantoni C, Longhi S, Mulorz MM, Lence T, Wessels H-H, Dassi E, Aiello G,  
769 Sutandy FXR, Scheibe M et al. 2021. Ythdf is a N6-methyladenosine reader that modulates Fmr1  
770 target mRNA selection and restricts axonal growth in Drosophila. *EMBO J* **40**: e104975.
- 771 Wu X, Liu M, Downie B, Liang C, Ji G, Li QQ, Hunt AG. 2011. Genome-wide landscape of  
772 polyadenylation in Arabidopsis provides evidence for extensive alternative polyadenylation. *Proc*  
773 *Natl Acad Sci USA* **108**: 12533.
- 774 Xu C, Wang X, Liu K, Roundtree IA, Tempel W, Li Y, Lu Z, He C, Min J. 2014. Structural basis for  
775 selective binding of m6A RNA by the YTHDC1 YTH domain. *Nat Chem Biol* **10**: 927-929.
- 776 Xu W, Rahman R, Rosbash M. 2018. Mechanistic implications of enhanced editing by a  
777 HyperTRIBE RNA-binding protein. *RNA* **24**: 173-182.
- 778 Xu XM, Rose A, Muthuswamy S, Jeong SY, Venkatakrisnan S, Zhao Q, Meier I. 2007. NUCLEAR  
779 PORE ANCHOR, the Arabidopsis homolog of Tpr/Mlp1/Mlp2/megator, is involved in mRNA export  
780 and SUMO homeostasis and affects diverse aspects of plant development. *Plant Cell* **19**: 1537-  
781 1548.
- 782 Zaccara S, Jaffrey SR. 2020. A Unified Model for the Function of YTHDF Proteins in Regulating  
783 m(6)A-Modified mRNA. *Cell* **181**: 1582-1595.e1518.
- 784 Zaccara S, Ries RJ, Jaffrey SR. 2019. Reading, writing and erasing mRNA methylation. *Nat Rev*  
785 *Mol Cell Biol* **20**: 608-624.
- 786 Zhao BS, Roundtree IA, He C. 2017. Post-transcriptional gene regulation by mRNA modifications.  
787 *Nat Rev Mol Cell Biol* **18**: 31.
- 788 Zhong S, Li H, Bodi Z, Button J, Vespa L, Herzog M, Fray RG. 2008. MTA is an Arabidopsis  
789 messenger RNA adenosine methylase and interacts with a homolog of a sex-specific splicing  
790 factor. *Plant Cell* **20**: 1278-1288.

791 Zhu T, Roundtree IA, Wang P, Wang X, Wang L, Sun C, Tian Y, Li J, He C, Xu Y. 2014. Crystal  
792 structure of the YTH domain of YTHDF2 reveals mechanism for recognition of N6-  
793 methyladenosine. *Cell Res* **24**: 1493-1496.  
794

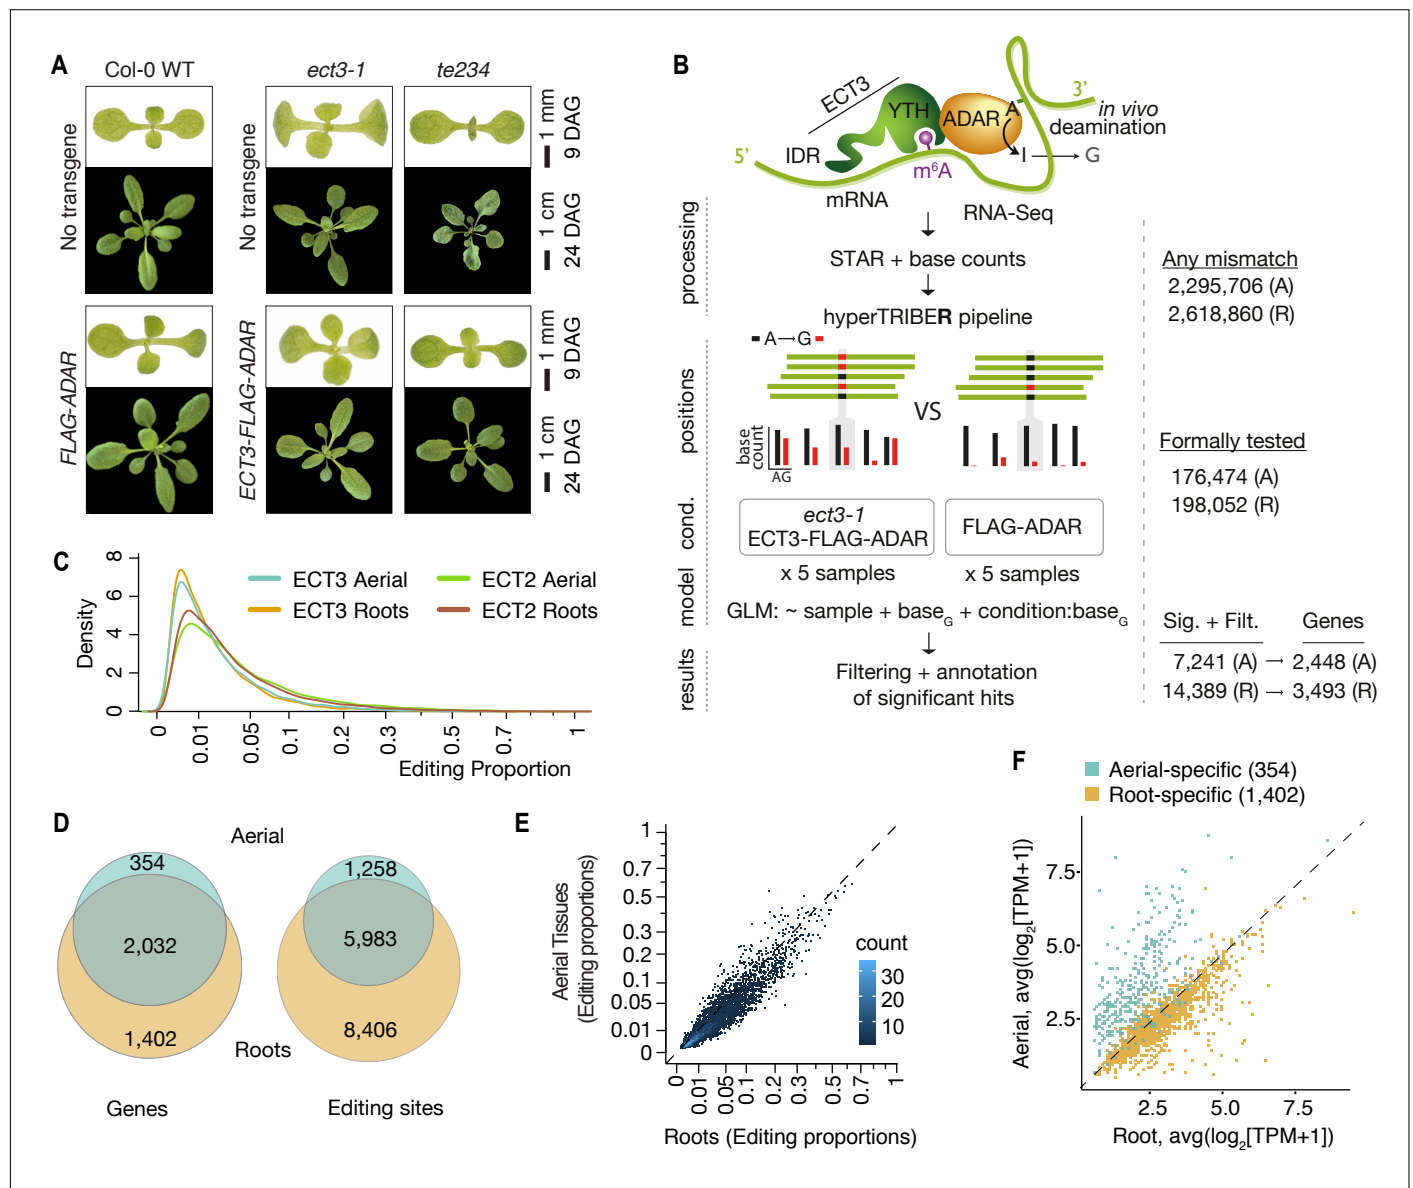

**Figure 1. Identification of ECT3 targets using HyperTRIBE.** (A) Phenotypes of wild type, *ect3-1* and *te234* (*ect2-1/ect3-1/ect4-2*) mutants with (lower panels) or without (upper panels) *ECT3pro:ECT3-FLAG-DmADAR<sup>E488Q</sup>cd-ECT3ter* (*ECT3-FLAG-ADAR*) or *ECT3pro:FLAG-DmADAR<sup>E488Q</sup>cd-ECT3ter* (*FLAG-ADAR*) transgenes, at 9 or 24 days after germination (DAG). (B) Experimental design for ECT3-HyperTRIBE (ECT3-HT) target identification. After quantifying nucleotide base counts from mapped RNA-seq libraries of *ect3-1* *ECT3-FLAG-ADAR* and *FLAG-ADAR* lines, all positions with mismatches were passed into the HyperTRIBER pipeline to call significant editing sites. Identified sites were further filtered to remove SNPs and retain only A-to-G mismatches. The number of sites in either aerial (A, dissected apices) or root (R, root tips) tissues at each stage is indicated. GLM, generalized linear model. (C) Density of editing proportions for significant editing sites in aerial tissues and roots of *ect3-1/ECT3-FLAG-ADAR* and *ect2-1/ECT2-FLAG-ADAR* (*accompanying manuscript*) lines. (D) Overlap between ECT3-HT target genes and editing sites in roots and aerial tissues, out of the set of genes commonly expressed in both tissues. (E) Scatterplot of the editing proportions of significant editing sites in ECT3-HT for aerial vs root tissues. (F) Scatterplot showing the expression in aerial and root tissues (mean log<sub>2</sub>[TPM+1]) over the 5 ECT3-HT control samples of the genes that are identified as targets only in aerial tissues or only in roots.

**Figure supplement 1.** Identification of ECT3 targets using HyperTRIBE (extended data).

**Figure supplement 2.** Characteristics of ECT3-HyperTRIBE editing sites relative to target expression levels.

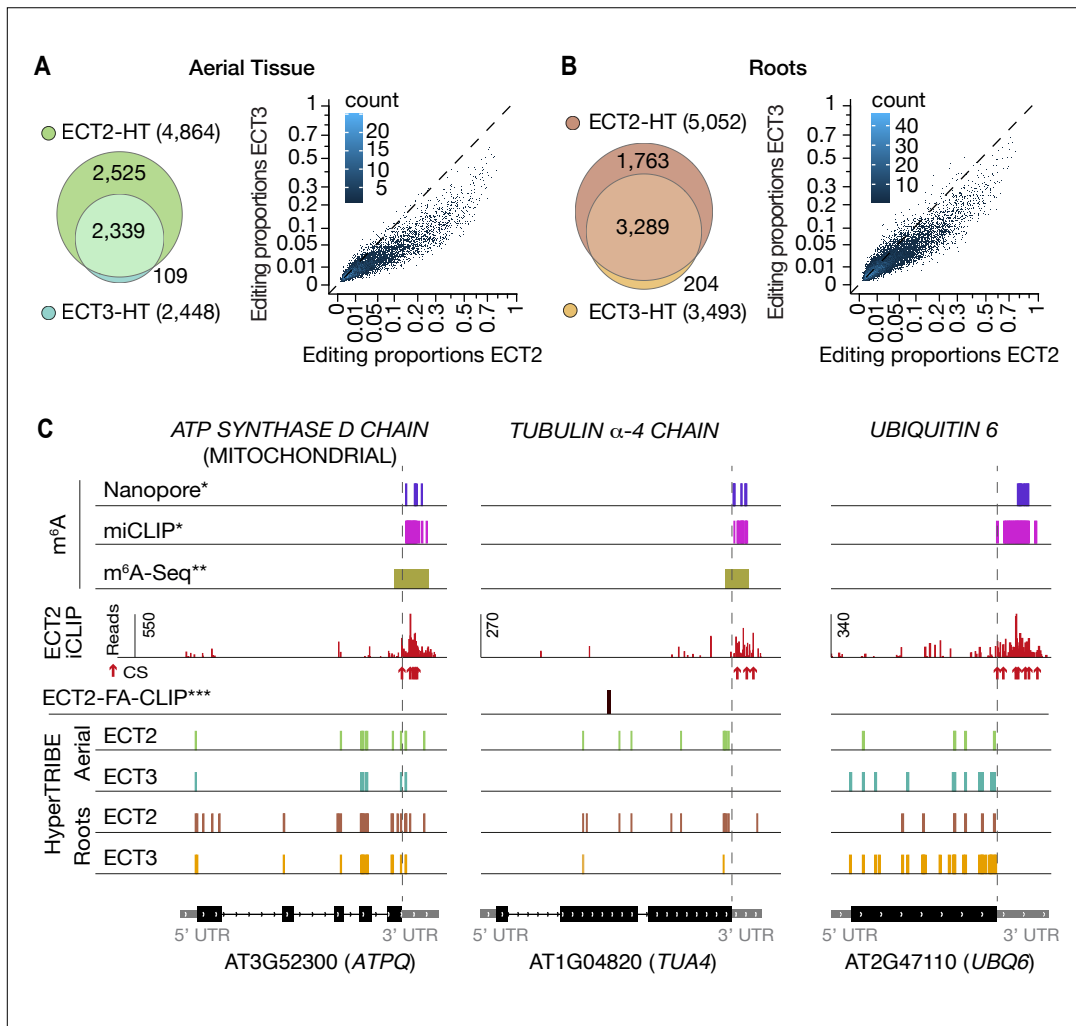

**Figure 2. ECT3 targets are fewer and largely contained within ECT2 targets. (A, B)** Left panels: overlap of ECT2-HT and ECT3-HT targets, for the set of commonly expressed genes, in aerial (A) and root (B) tissues. Right panels: Scatter plots showing the editing proportions of editing sites between ECT2-HT and ECT3-HT, for all significant positions common to both sets, separately for aerial tissues (A) and roots (B). **(C)** Examples of common ECT2 and ECT3 targets showing the distribution of ECT2/3-HT editing sites sites in either roots or shoots along the transcript. The distribution of ECT2-iCLIP reads and peaks, FA-CLIP peaks\*\*\*, and m<sup>6</sup>A sites\*\*\* is also shown. \* Parker et al. (2020); \*\* Shen et al. (2016); \*\*\* Wei et al. (2018).

**Figure supplement 1.** Sequencing depth of ECT2 and ECT3 HyperTRIBE RNA-seq data.

**Figure supplement 2.** ECT2 and ECT3 target each other and themselves.

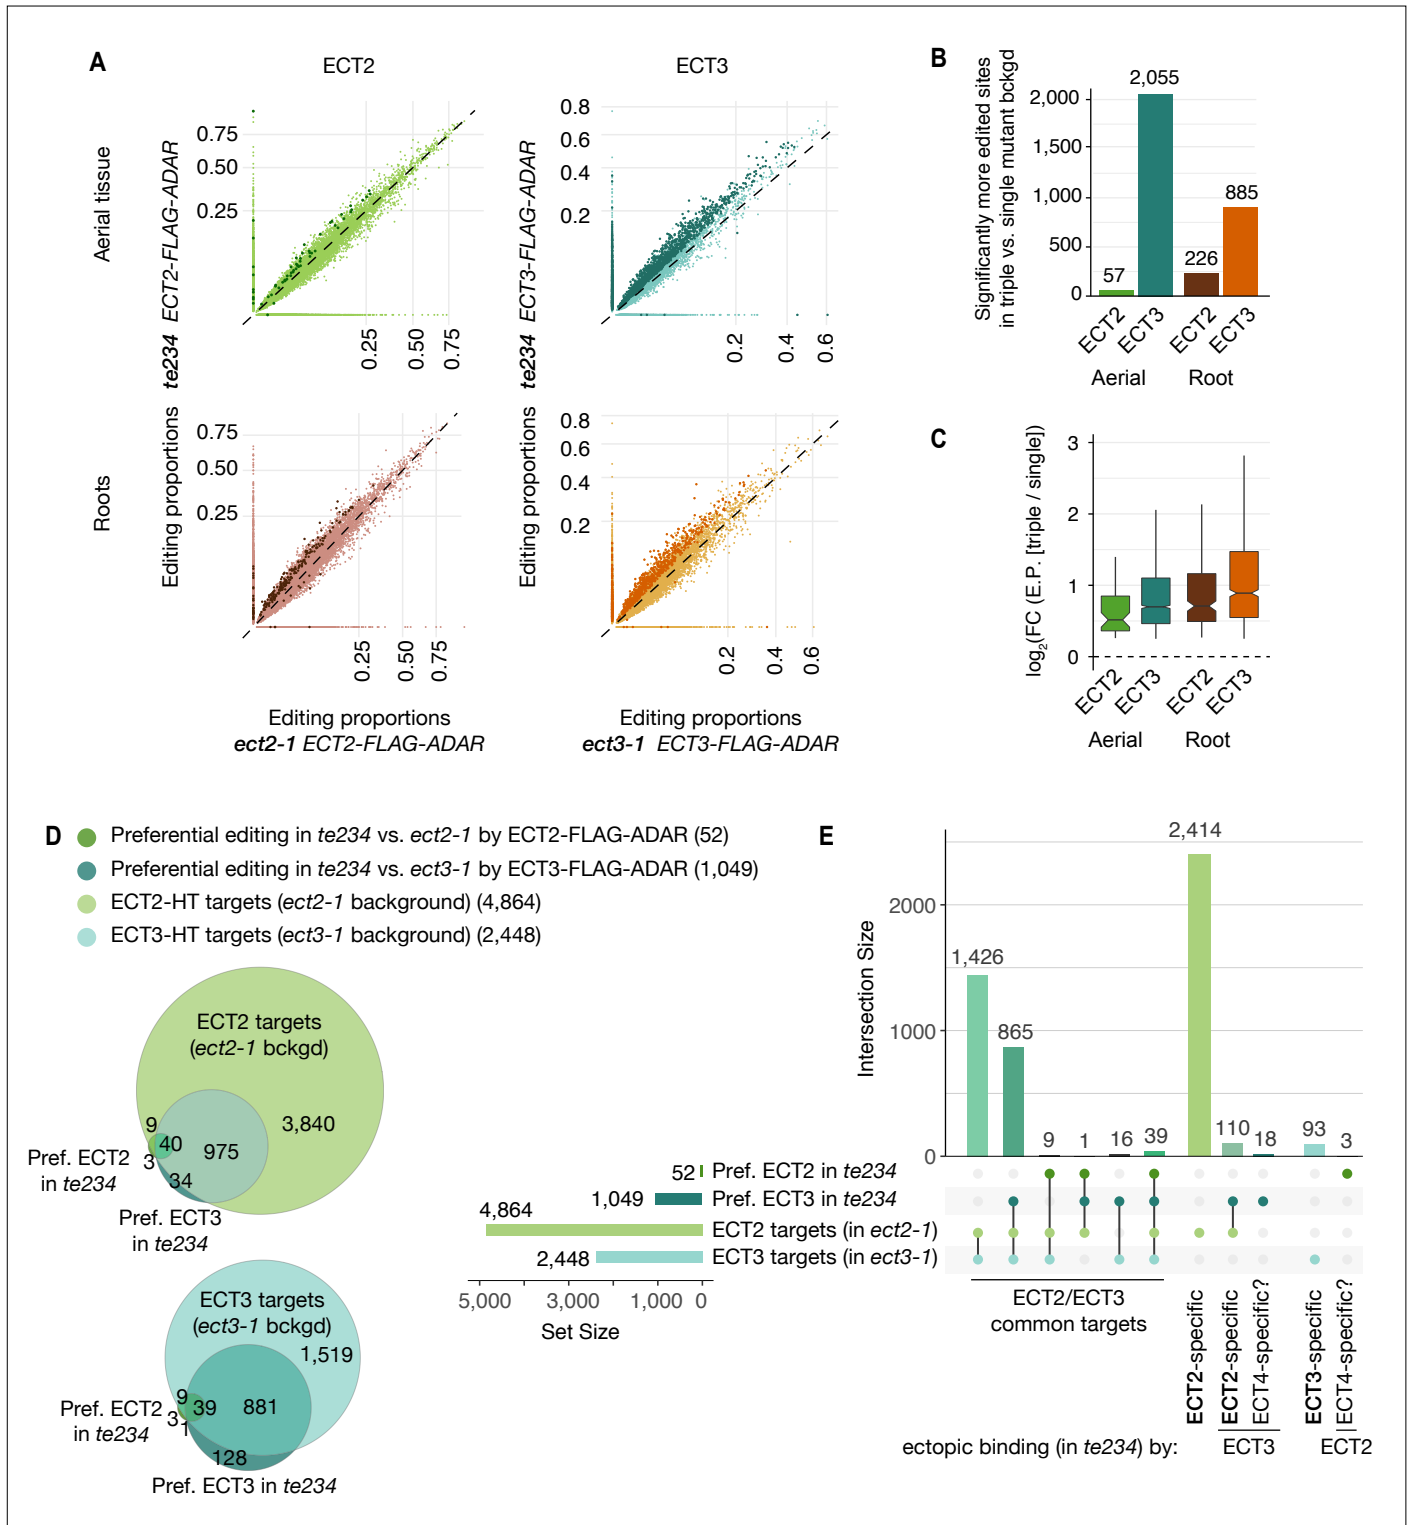

**Figure 3. Redundancy between ECT2 and ECT3.** (A) Scatterplots comparing the editing proportions of ECT2- and ECT3-FLAG-ADAR observed in triple vs. single mutant backgrounds in aerial and root tissues. They include all positions significantly edited with respect to FLAG-ADAR controls ( $p$ -value  $< 0.01$ ,  $\log_2(\text{FC}) > 1$ ) in either background, with dots on the axes reflecting positions not significantly edited in one of the two backgrounds. Dots in darker shades indicate positions more highly edited in one background compared to the other ( $p$ -value  $< 0.1$ ,  $\log_2(\text{FC}) > 0.25$  or  $\log_2(\text{FC}) < -0.25$ ). (B) Barplots showing the number of positions significantly more edited in triple vs. single mutant background for each tissue and ECT protein. Positions significantly less edited in triple mutant background were less than 12 in all cases. (C) Boxplots showing fold changes in editing proportions between triple and single mutant background for the 2 ECT proteins and tissues studied. (D,E) Venn diagrams (D) and Upset plot (E) showing the overlap between the ECT2 and ECT3-HT target sets (in single mutant backgrounds) with the groups of genes with more highly edited positions in the triple mutant background in aerial tissues (the equivalent for roots is shown in [Figure 3—figure supplement 2](#)).

**Figure supplement 1.** Expression levels (TPM) of the FLAG-ADAR-containing transgenes in all HyperTRIBE lines.

**Figure supplement 2.** Overlap between ECT2/3-HT targets in single and triple mutant background in roots.

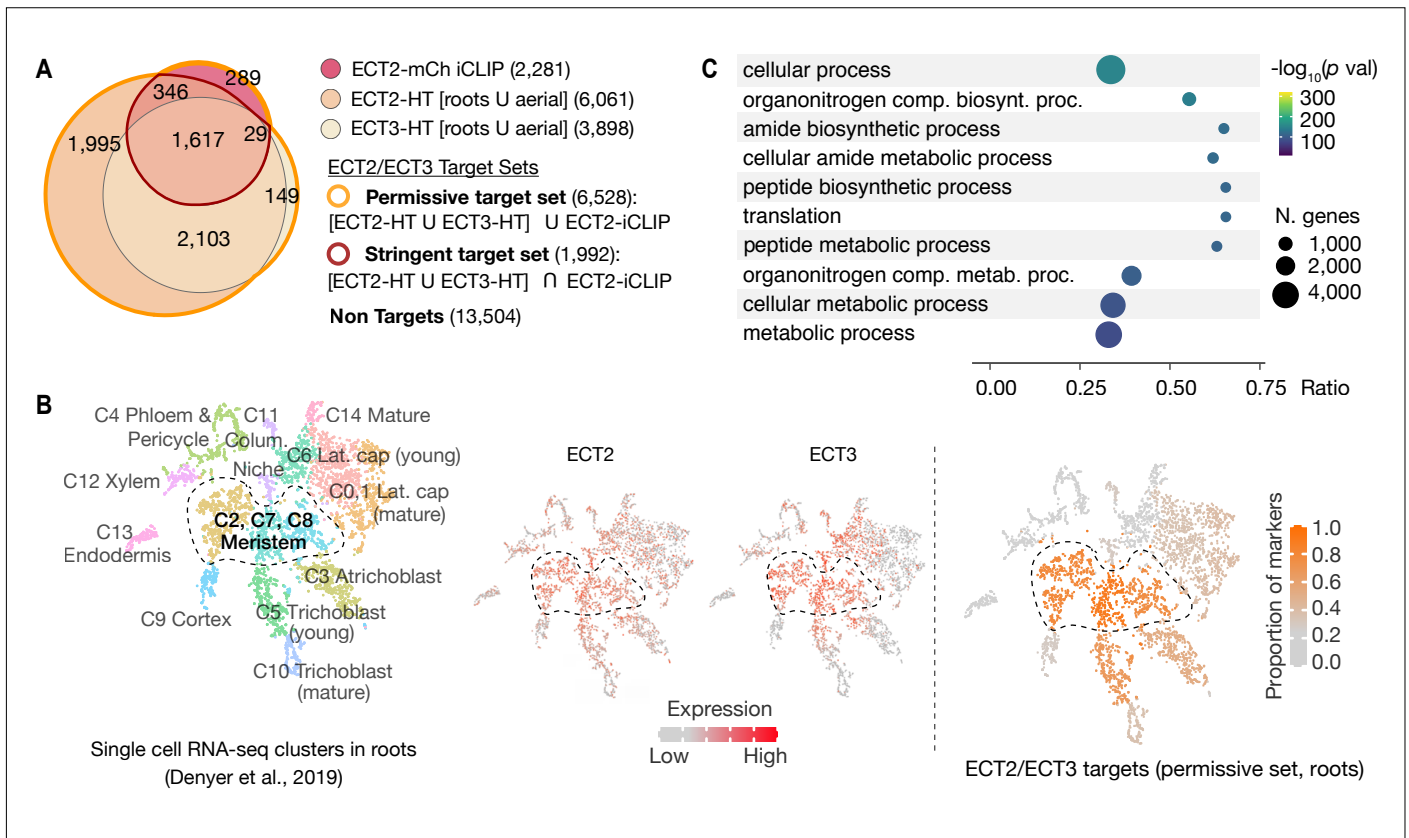

**Figure 4. ECT2 and ECT3 targets are co-expressed with ECT2 and 3 in proliferating cells and enriched in biosynthetic processes.** (A) Overlap between ECT2-iCLIP target genes with ECT2-HT and ECT3-HT target gene sets. Regions outlined in bold orange and red indicate the defined permissive and stringent ECT2/3 target sets in whole seedlings, respectively (aerial and root-specific target sets are shown in the [figure supplement 1](#)). Non-targets are all expressed genes (with detectable transcript levels in the corresponding HyperTRIBE RNA-Seq datasets) that are not in the permissive target set. (B) Left: t-SNE plot for scRNA-seq data in roots from Denyer et al. (2019), with cells colored according to their cell-type cluster definitions (see [figure supplement 2](#) for details). Center: ECT2 and ECT3 single cell expression levels overlaid on to the t-SNE plot (Ma et al., 2020). Right: t-SNE plot with cell-type clusters shaded according to the proportion of marker genes from Denyer et al. (2019) that are targets of ECT2 or ECT3 in roots. Dashed enclosed region indicates clusters that contain meristematic cells. (C) The 10 most significantly enriched GO terms among ECT2/3 targets (permissive set).

**Figure supplement 1.** ECT2 and ECT3 target sets in aerial and root tissues.

**Figure supplement 2.** ECT2/ECT3 targets are co-expressed with *ECT2/3* in highly dividing root cells

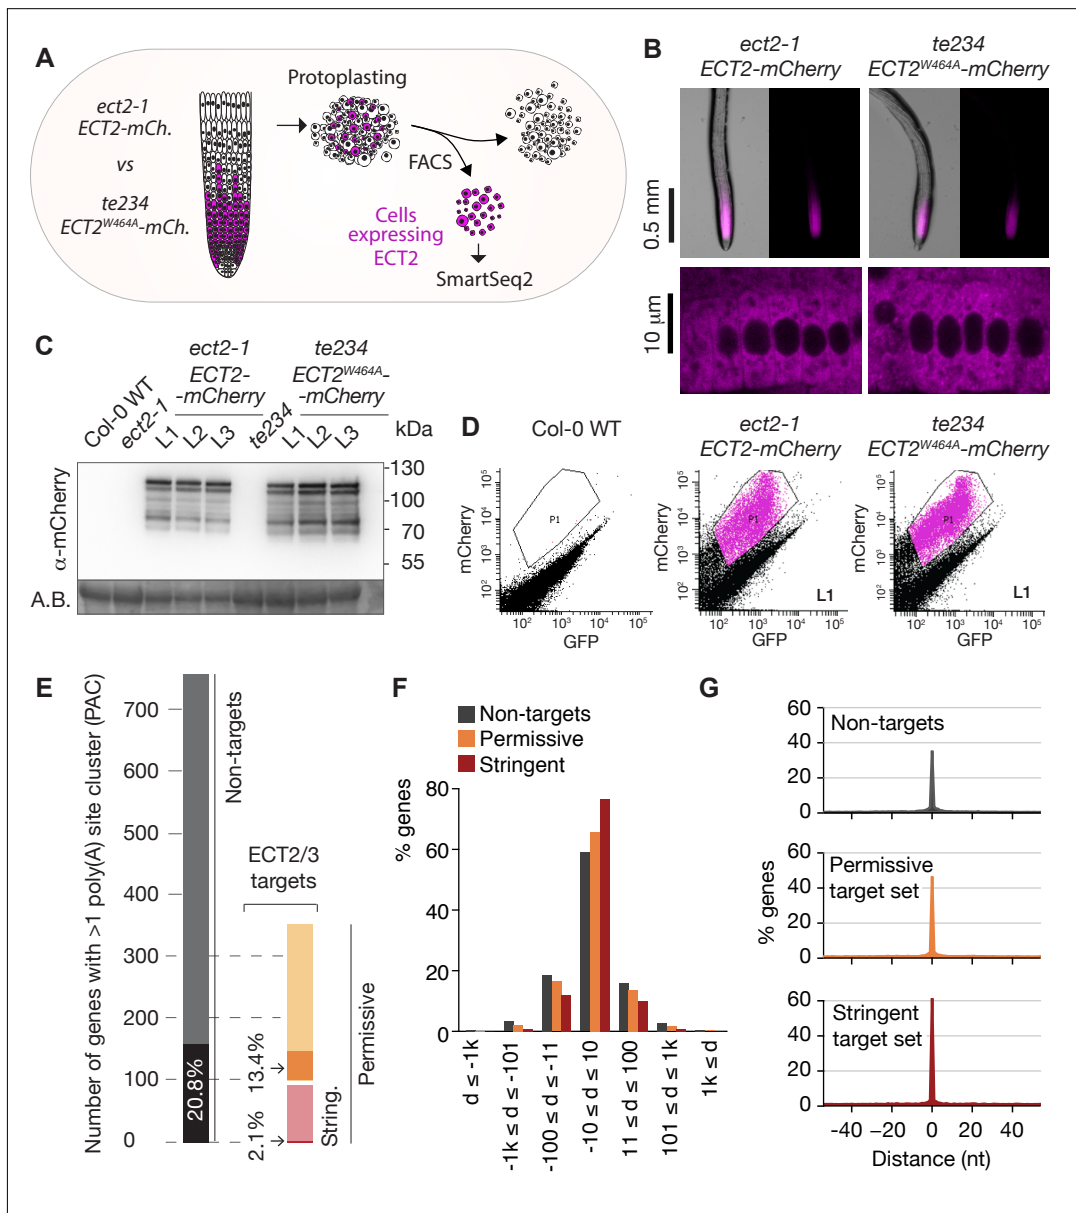

**Figure 5. Poly(A) sites in ECT2/3 targets do not change upon loss of ECT2/3/4 function. (A)** Experimental design. The experiment was performed once, using 3 biological replicates (independent lines) per group (genotype). **(B)** Expression pattern of ECT2-mCherry in root tips of *ect2-1 ECT2-mCherry* and *te234 ECT2<sup>W464A</sup>-mCherry* genotypes by fluorescence microscopy. **(C)** Protein blot showing expression levels of ECT2-mCherry in the 3+3 lines of *ect2-1 ECT2-mCherry* and *te234 ECT2<sup>W464A</sup>-mCherry* used as biological replicates for FACS selection of ECT2-expressing cells. Amido black (A.B.) is used as loading control. **(D)** Fluorescence profile (mCherry vs. GFP fluorescence) of root cells (protoplasts) from the transgenic lines in C. The complete set of lines/samples is shown in the [figure supplement 1](#). Non-transgenic Col-0 WT is shown as control for background autofluorescence. Cells with a fluorescence profile within the outlined areas were selected for RNA extraction, Smart-seq2 library construction and sequencing. **(E)** Genes with more than one polyA site cluster (PAC) in the different target/non-target sets. Dark shades are genes in which the dominant PAC in *te234 ECT2<sup>W464A</sup>-mCherry* samples differs from the one in *ect2-1 ECT2-mCherry*. **(F,G)** Distribution of distances (d [nt]) of the most common poly(A) site between *te234 ECT2<sup>W464A</sup>-mCherry* and *ect2-1 ECT2-mCherry* samples for all genes where the most common poly(A) site could be determined in both genotypes (6,648 non-targets, 4,072 permissive targets, and 1,486 stringent targets). Negative values are upstream (5') and positive values are downstream (3') relative to the gene orientation. (F) Distances are binned by  $\pm 10$ ,  $\pm 100$ ,  $\pm 1000$ , and  $>1,000$ bp. (G) Distances are plotted by nucleotide in a  $\pm 40$ bp window.

**Source data 1-3.** Uncropped labelled panels and raw image files - [Figure 5C](#).

**Figure supplement 1.** FACS-sorting of root protoplasts expressing ECT2-mCherry.

**Figure supplement 2.** Poly(A) sites do not change in ECT2/3 targets upon loss of ECT2/3/4 function (extended data).

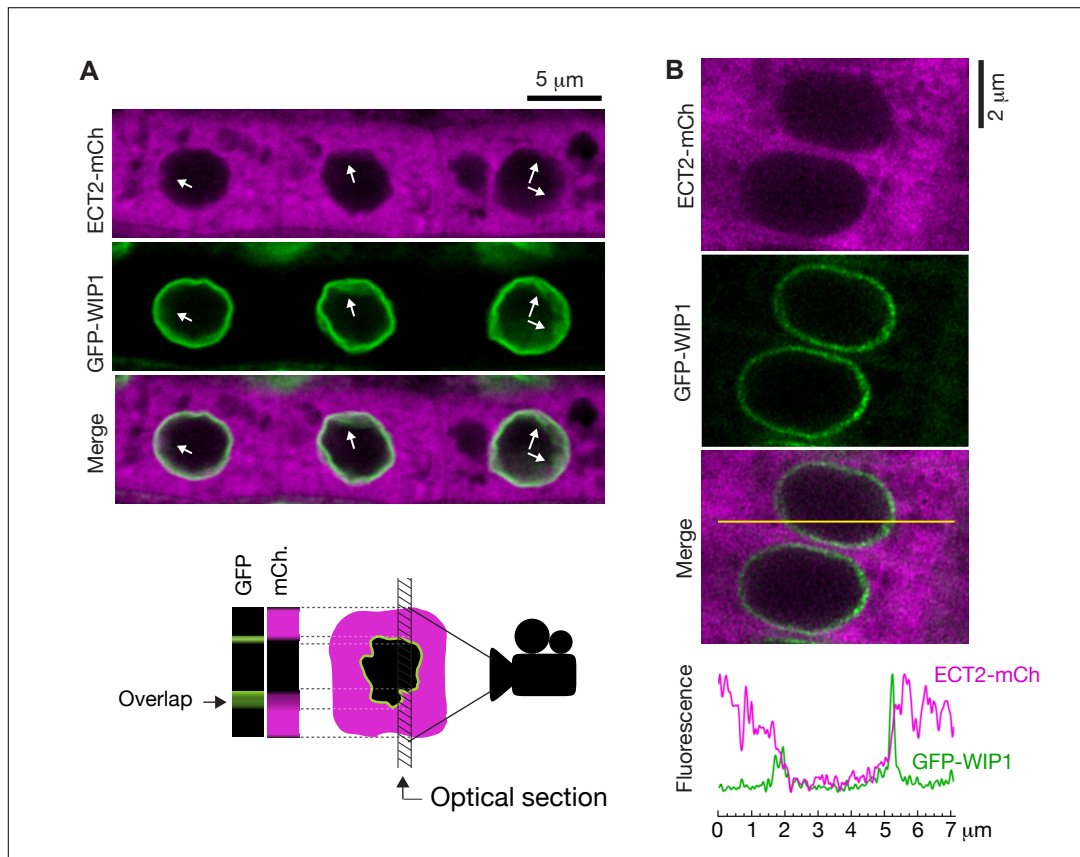

**Figure 6. ECT2 is not in the nucleus.** (A) Standard confocal microscopy of root cells co-expressing *ECT2-mCherry* and *GFP-WIP1*. White arrows indicate areas in which apparent spills of ECT2-mCherry signal into the nucleus overlap with blurry GFP signal from the nuclear envelope, a sign of not-perpendicularity between the envelope and the optical plane as exemplified on the cartoon at the bottom. (B) Airyscan super-resolution confocal microscopy of root cells as in A. The image is cropped from a larger picture shown in the [figure supplement 1](#). mCherry and GFP fluorescence signals along the yellow line show absence of ECT2-mCherry inside the limits of the GFP-labelled nuclear envelope.

**Figure supplement 1.** Super-resolution confocal microscopy of cells co-expressing ECT2-mCherry and the nuclear envelope marker GFP-WIP1.



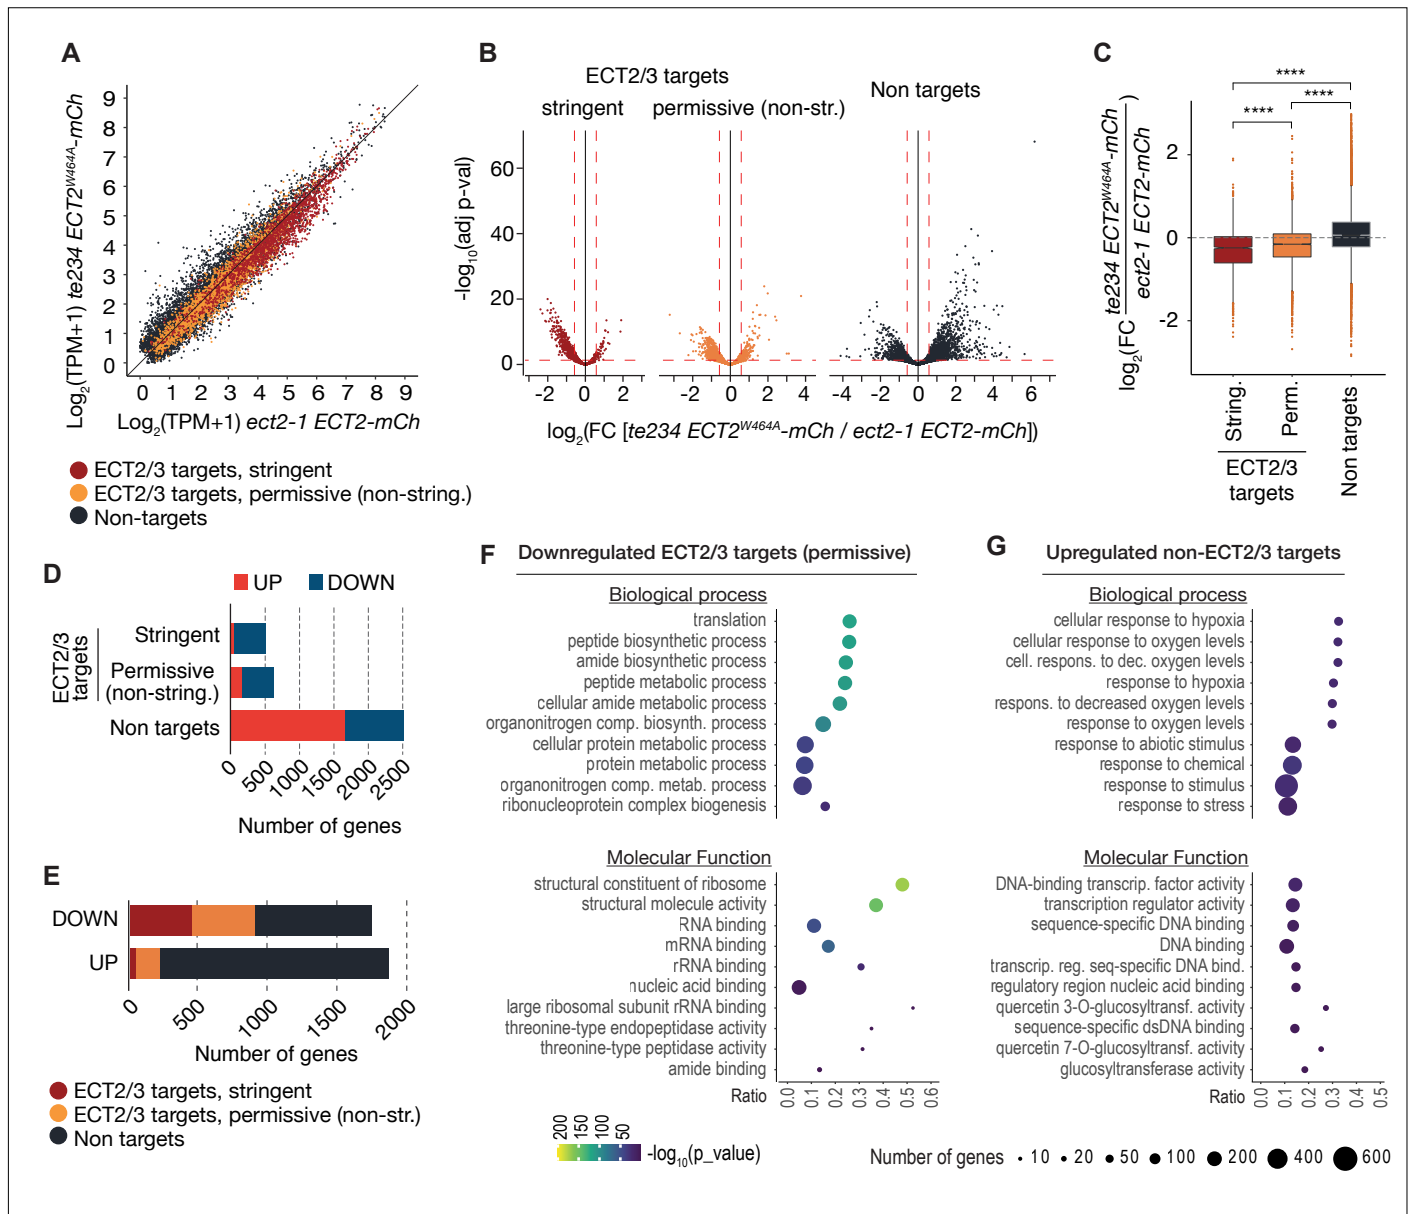

**Figure 7. ECT2/3 targets are generally less abundant in cells without ECT2/3/4 function.** (A) Scatterplot of TPM expression values in Smart-seq2 libraries of root protoplasts expressing ECT2-mCherry in *te234/ECT2<sup>W464A</sup>-mCherry* vs. *ect2-1/ECT2-mCh* samples. (B) Volcano plots reveal genes differentially expressed between the genotypes described in A. (C) Boxplots of  $\log_2$  fold change expression values between *te234/ECT2<sup>W464A</sup>-mCherry* and *ect2-1/ECT2-mCh* samples. (D,E) Bar plots showing the amount of significantly up- and downregulated genes in ECT2/3 targets and non-targets. (F,G) List with the 10 most significantly enriched GO terms among significantly upregulated ECT2/3 targets (permissive set) (F), or downregulated non-targets (G) upon loss of ECT2/3/4 function.

**Figure supplement 1.** ECT2/3 targets are generally less abundant in root tips of *ect2/ect3/ect4* knockout plants.



**Figure 8. miRNA profile in root tips of *ect2/ect3/ect4* knockout plants. (A)** Differential expression analysis of *te234* vs. Col-0 WT in 4-day-old root tips shows that expression of several stress-related NF-YA transcription factors (miR169defg targets) is induced in *te234* plants. FC, Fold Change [*te234*/WT]. **(B)** Volcano plot showing miRNAs differentially expressed in *te234* vs. Col-0 WT in 4-day-old root tips.

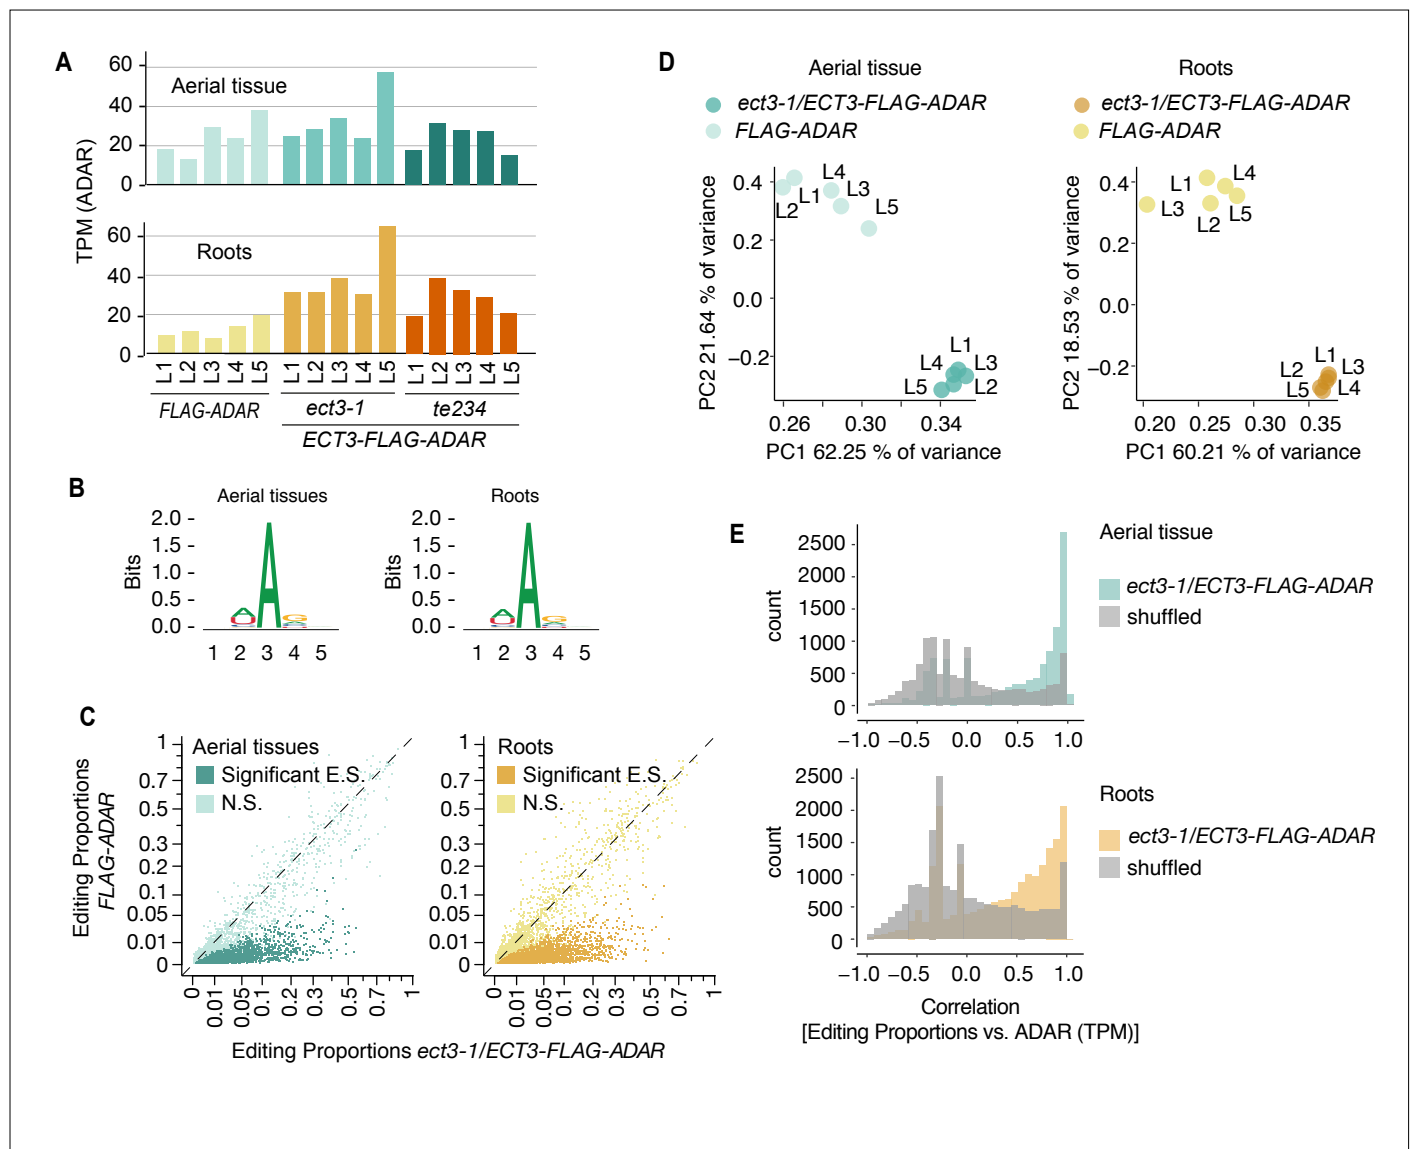

**Figure 1—figure supplement 1. Identification of ECT3 targets using HyperTRIBE (extended data).** (A) Expression levels of *ECT3-FLAG-ADAR* or *FLAG-ADAR* in apices (aerial tissues) or root tips of 10-day-old seedlings of the 5+5 independent transgenic lines (L1-L5) used for the experiment. (B) Consensus motif identified at significant editing sites of *ect3-1/ECT3-FLAG-ADAR* lines. (C) Scatterplot of the editing proportions (E.P. = G/(A+G)) of potential and significant editing sites (E.S.) of *ect3-1/ECT3-FLAG-ADAR* lines compared to the *FLAG-ADAR* controls. N.S., not significant. (D) Principal component analysis of editing proportions at significant editing sites in *ECT3-HT*. (E) Distribution of the correlations between editing proportions and ADAR expression (TPM) for significant editing sites in *ect3-1/ECT3-FLAG-ADAR* lines. Background correlations are based on randomly shuffling ADAR expression for each site.

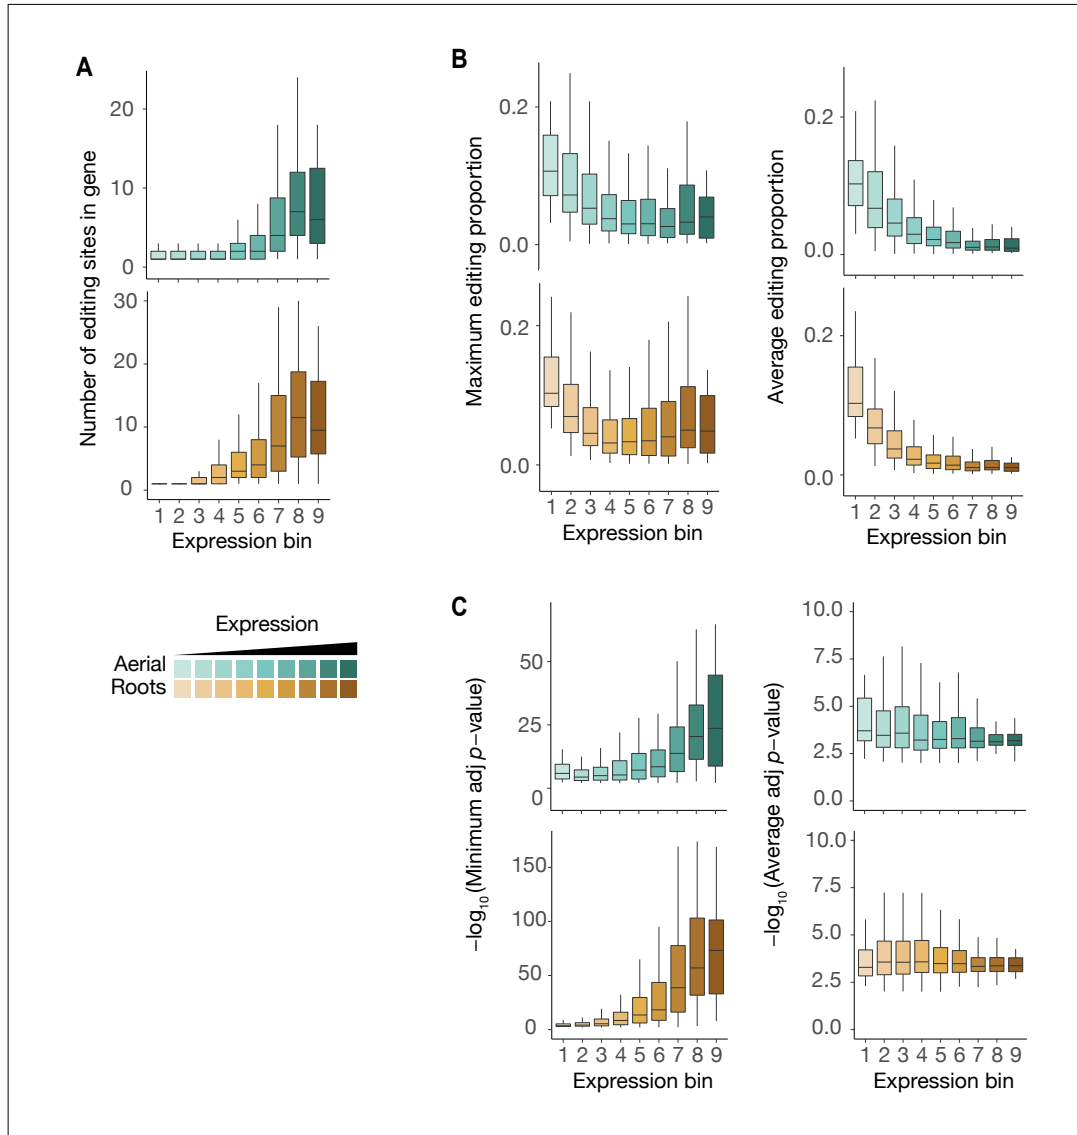

**Figure 1—figure supplement 2. Characteristics of ECT3-HyperTRIBE editing sites relative to target expression levels. (A-C)** Number of significant editing sites (A), maximum or average editing proportions (B), and significance of editing sites according to either minimum or average  $-\log_{10}$ (adjusted  $p$ -value) per gene (C) in ECT3-HT targets split according to their expression levels (mean  $\log_2(\text{TPM}+1)$  over the five ECT3-HT control samples), in both aerial and root tissues.

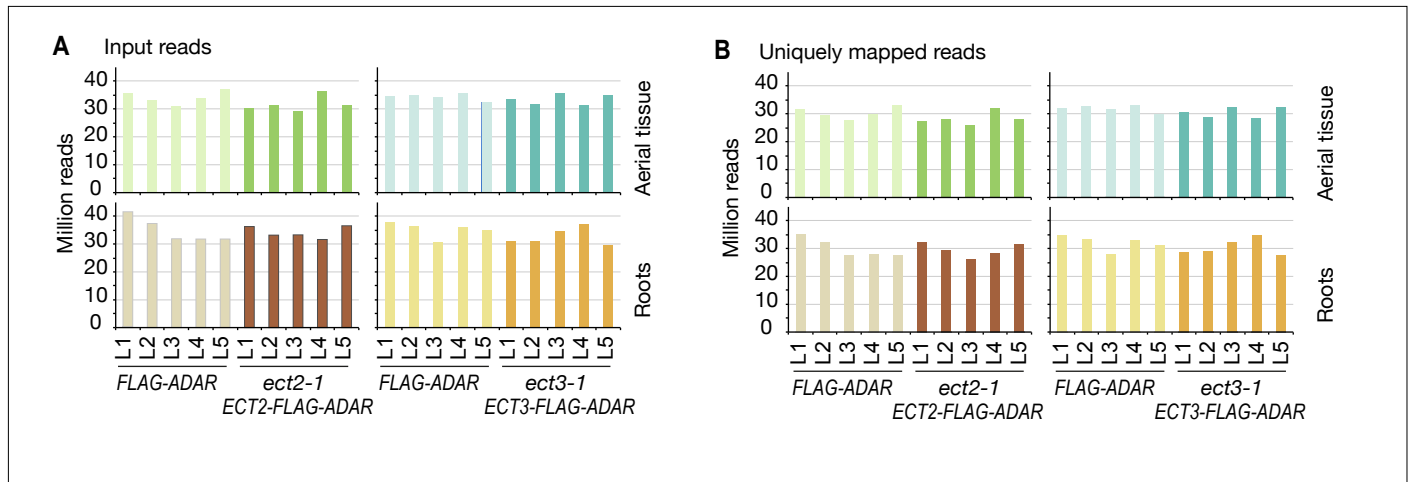

**Figure 2—figure supplement 1. Sequencing depth of ECT2 and ECT3 HyperTRIBE RNA-seq data. (A,B)** Number of input reads (A) and uniquely mapped reads (B) for ECT2-HT and ECT3-HT RNA-seq samples.

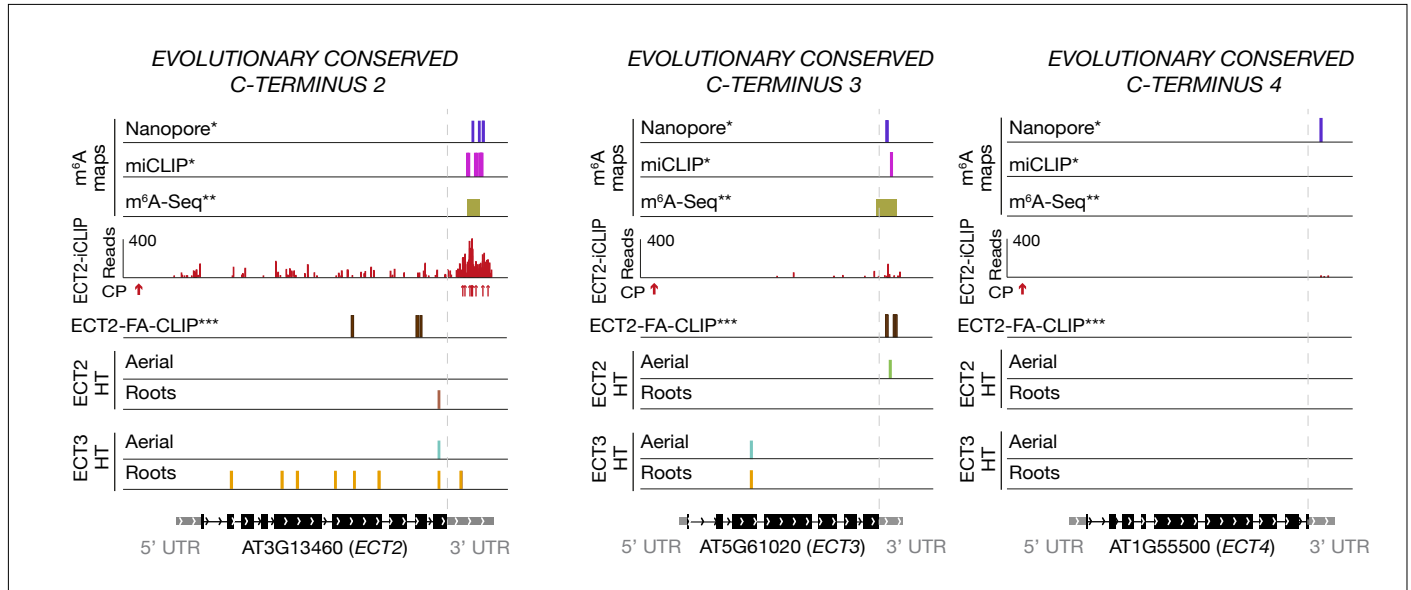

**Figure 2—figure supplement 2. ECT2 and ECT3 target each other and themselves.** Distribution of ECT2/3-HT editing sites and ECT2-iCLIP peaks along *ECT2/3/4*-encoding transcripts. *ECT2* is a target of ECT3, particularly clearly in roots, and *ECT3* is a target of ECT2 according to ECT2-HT in aerial tissues (not confirmed by ECT2-iCLIP). Although self-targeting of *ECT2* and *ECT3* may also be taken into consideration, it is important to notice that these targeted transcripts originate from transgenes. *ECT4* (right panel) does not appear as ECT2/3 target, but its low expression levels might account for a false negative. FA-CLIP peaks\*\*\*, and m<sup>6</sup>A sites\*\*\* are shown as a reference. \* Parker et al. (2020); \*\* Shen et al. (2016); \*\*\* Wei et al. (2018)

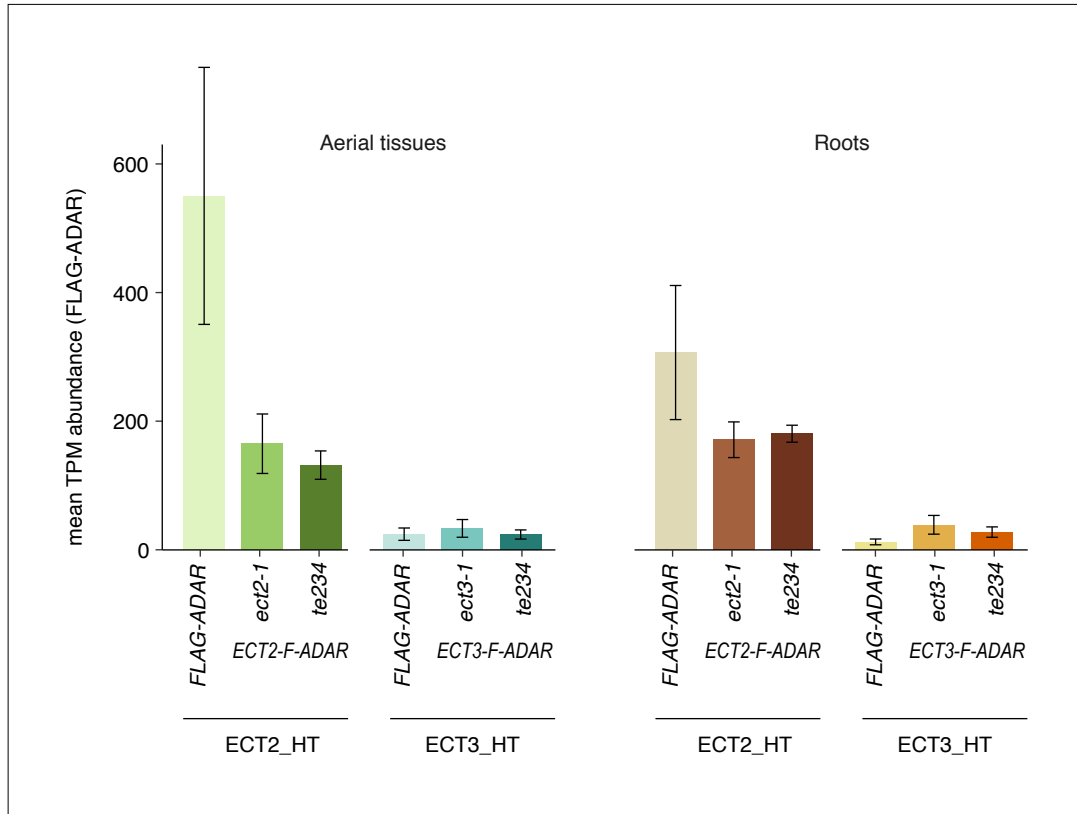

**Figure 3—figure supplement 1. Expression levels (TPM) of the FLAG-ADAR-containing transgenes in all HyperTRIBE lines.** TPMs for the five lines of every type have been averaged for simplicity. Notice that expression of ECT2/3-FLAG-ADAR transgenes is highly comparable in triple and single mutant backgrounds, ruling out the possibility of higher editing proportions in the triple mutant background due to higher abundance of the transgene. The expression of ECT3-FLAG-ADAR is generally lower than that of ECT2-FLAG-ADAR, as expected from the relative abundance of the endogenous transcripts (Arribas-Hernández et al., 2018).

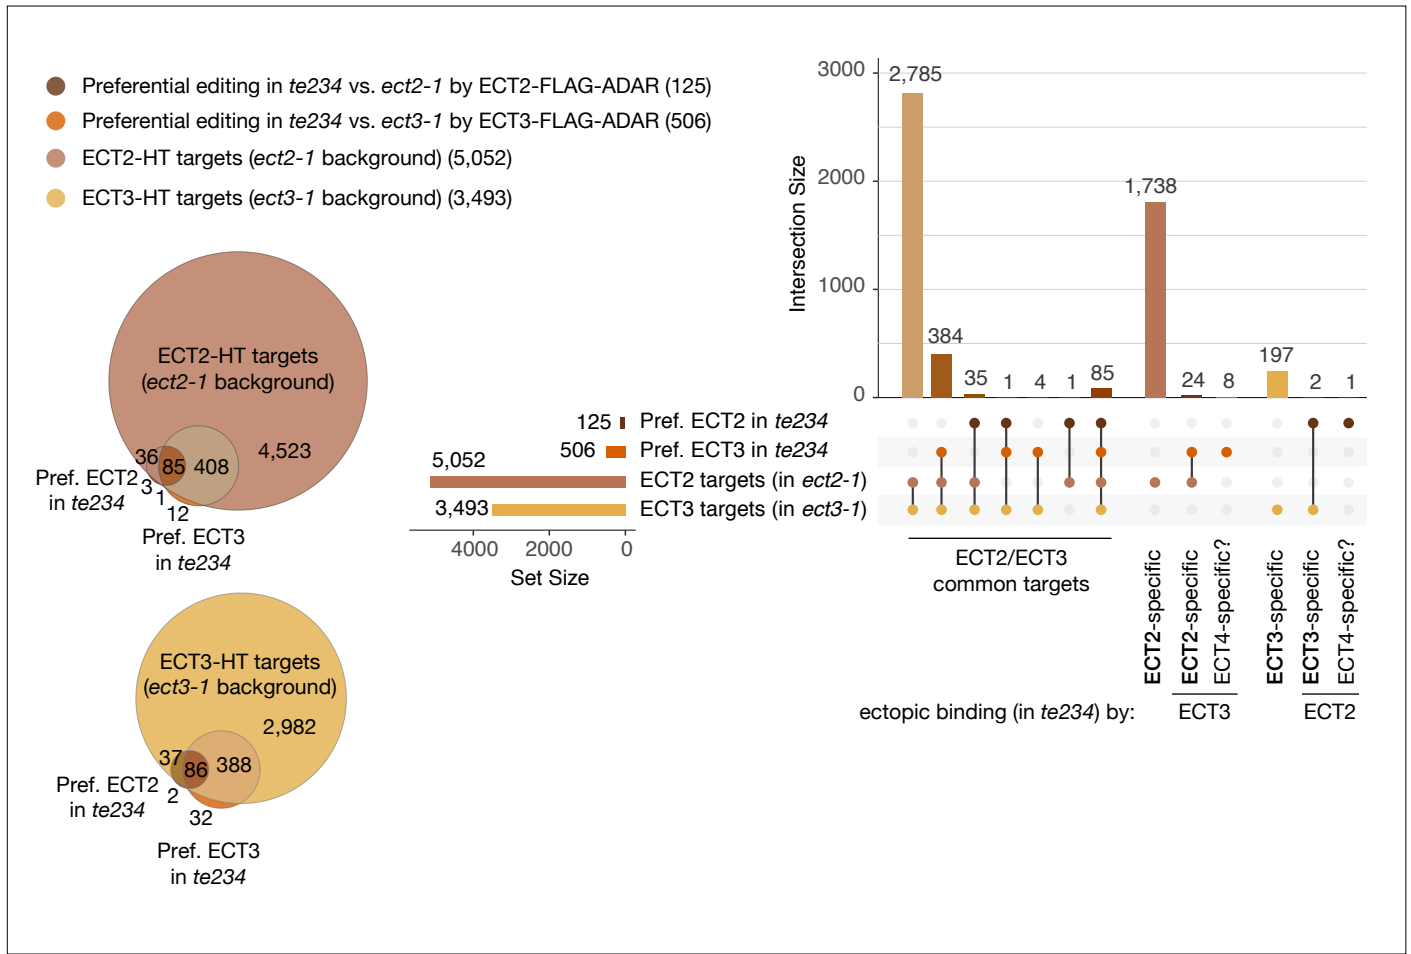

**Figure 3—figure supplement 2. Overlap between ECT2/3-HT targets in single and triple mutant background in roots.** Venn diagrams (left) and Upset plot (right) showing the overlap between the ECT2 and ECT3-HT target sets (in single mutant backgrounds) with the groups of genes with more highly edited positions in the triple mutant background in roots (the equivalent for aerial tissues is shown in [Figure 3D,E](#)).



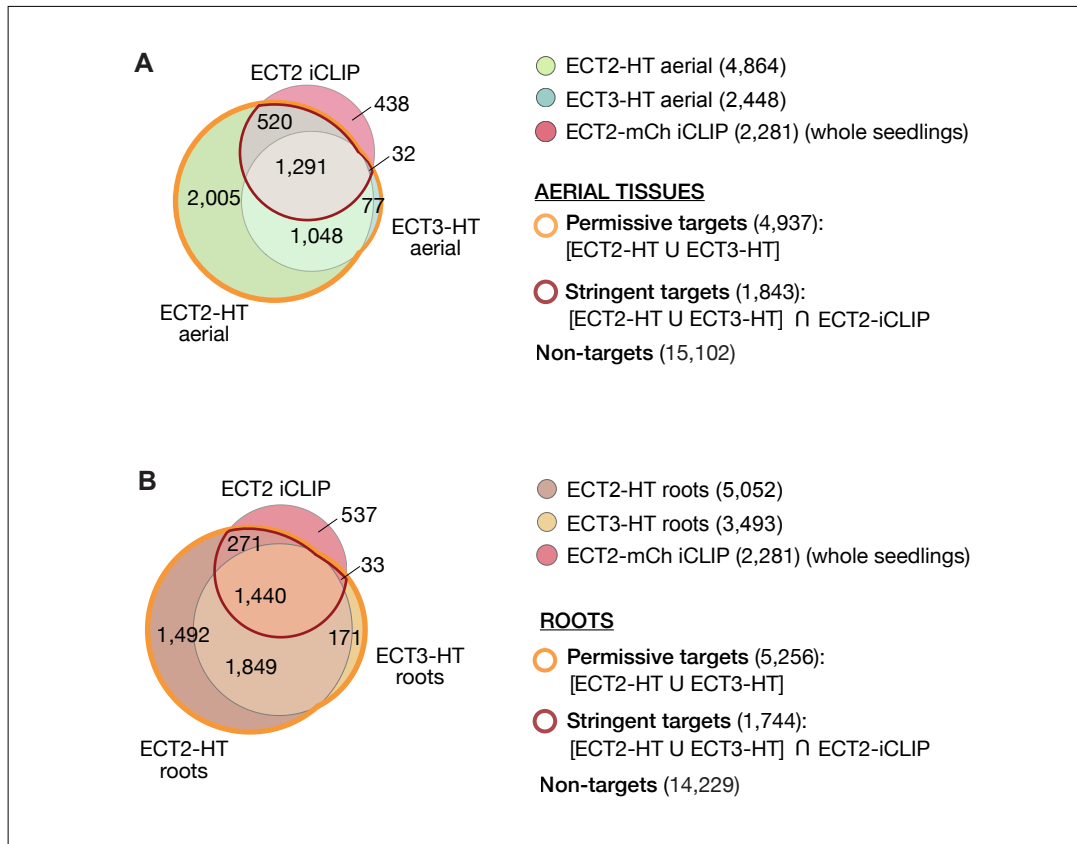

**Figure 4—figure supplement 1. ECT2 and ECT3 target sets in aerial and root tissues. (A,B)** Overlap between HyperTRIBE target sets of ECT2 and ECT3 in aerial tissue (A) or roots (B), and ECT2-iCLIP (whole seedlings). Genes contained within the outlined sets in roots constitute the permissive (orange outline) and stringent (dark red outline) ECT2/3 target sets (Supplementary File 4) for the subsequent transcriptome analyses of sorted root protoplasts. Non-targets are all genes with detectable transcript levels in the ECT2 or ECT3 (aerial or root) HT RNA-Seq datasets that are not in the permissive target set.

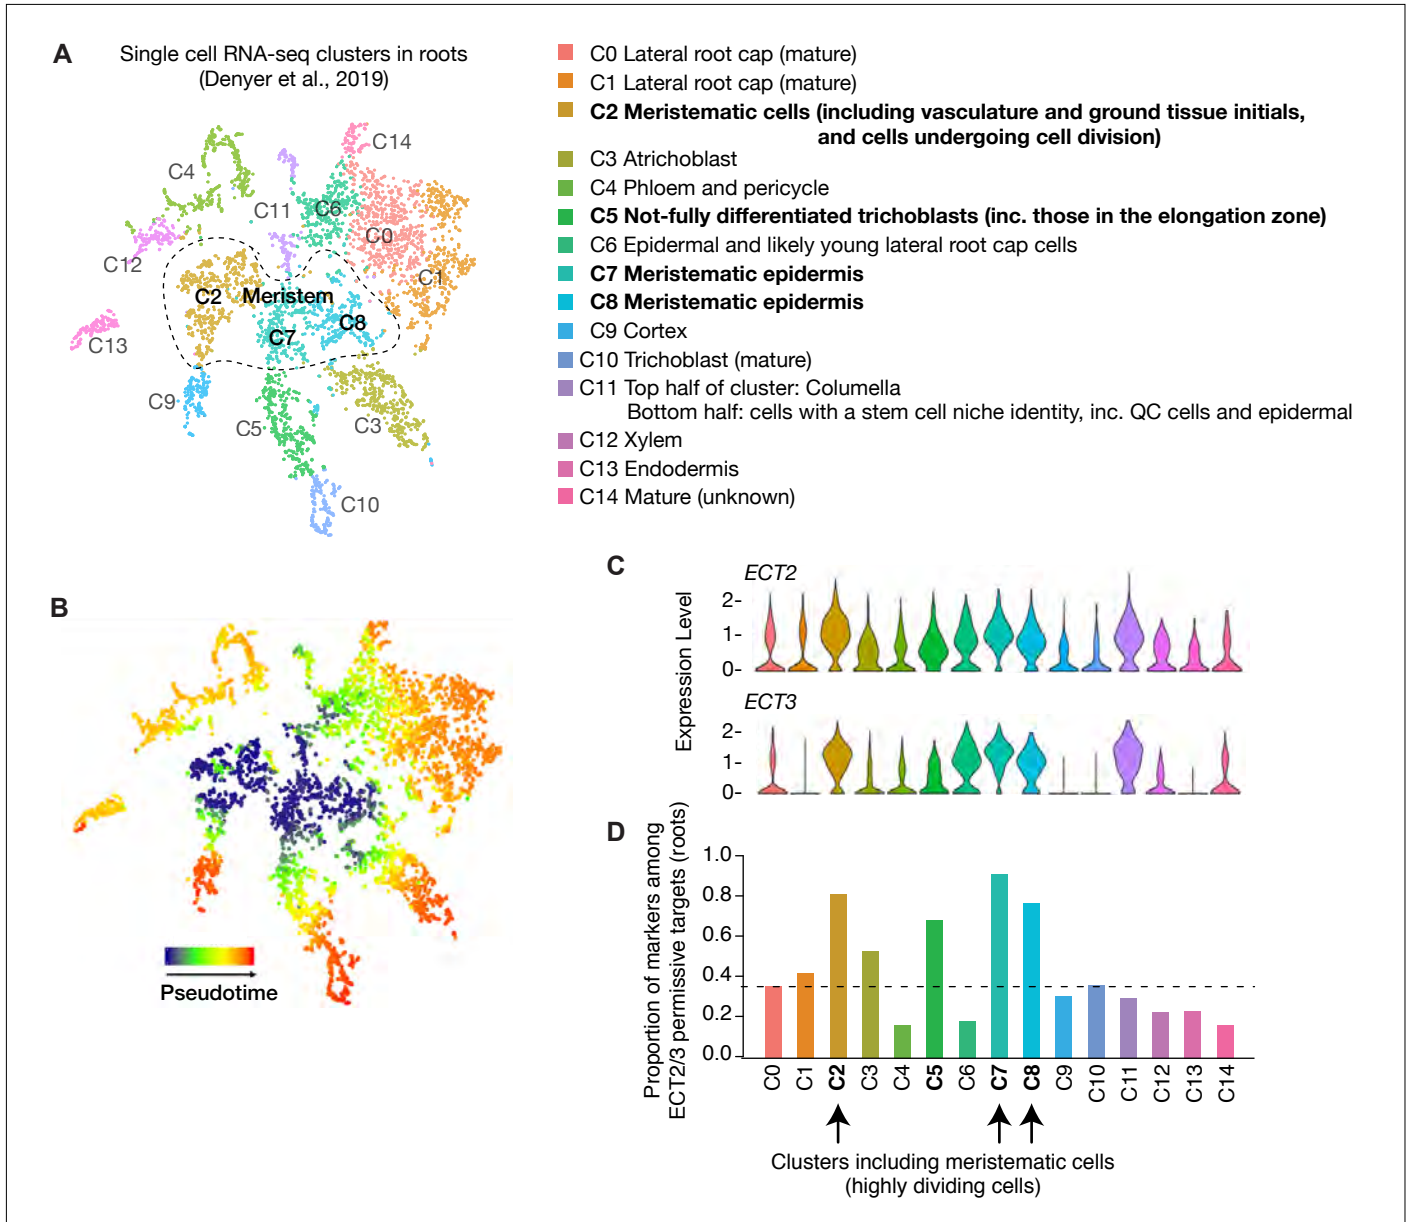

**Figure 4—figure supplement 2. ECT2/ECT3 targets are co-expressed with ECT2/3 in highly dividing root cells. (A)** t-SNE plot for scRNA-seq data in roots from Denyer et al. (2019), with cells coloured according to their cell-type cluster definitions described on the right side (<https://www.zmbp-resources.uni-tuebingen.de/timmermans/plant-single-cell-browser-arabidopsis-root-atlas/> and personal communication with Thomas Denyer). Dashed-enclosed region indicates clusters that contain meristematic cells. **(B)** Temporal reference map derived from pseudotime analysis of cells (Denyer et al., 2019) illustrates the progressive maturation of cells from the meristem core (reproduced with permission from Ma et al. (2020)). **(C)** Violin plot showing *ECT2* and *ECT3* single cell expression levels in the different clusters defined in **A**. These plots and their corresponding grey-red shaded t-SNE plots in **Figure 4B** (centre panels) were obtained from the above-mentioned website (Ma et al., 2020). **(D)** Box plot showing the proportion of marker genes from Denyer et al. (2019), which are targets of *ECT2* or *ECT3* in roots. These values were used to obtain the corresponding grey-orange shaded t-SNE plot shown in **Figure 4B** (right panel).

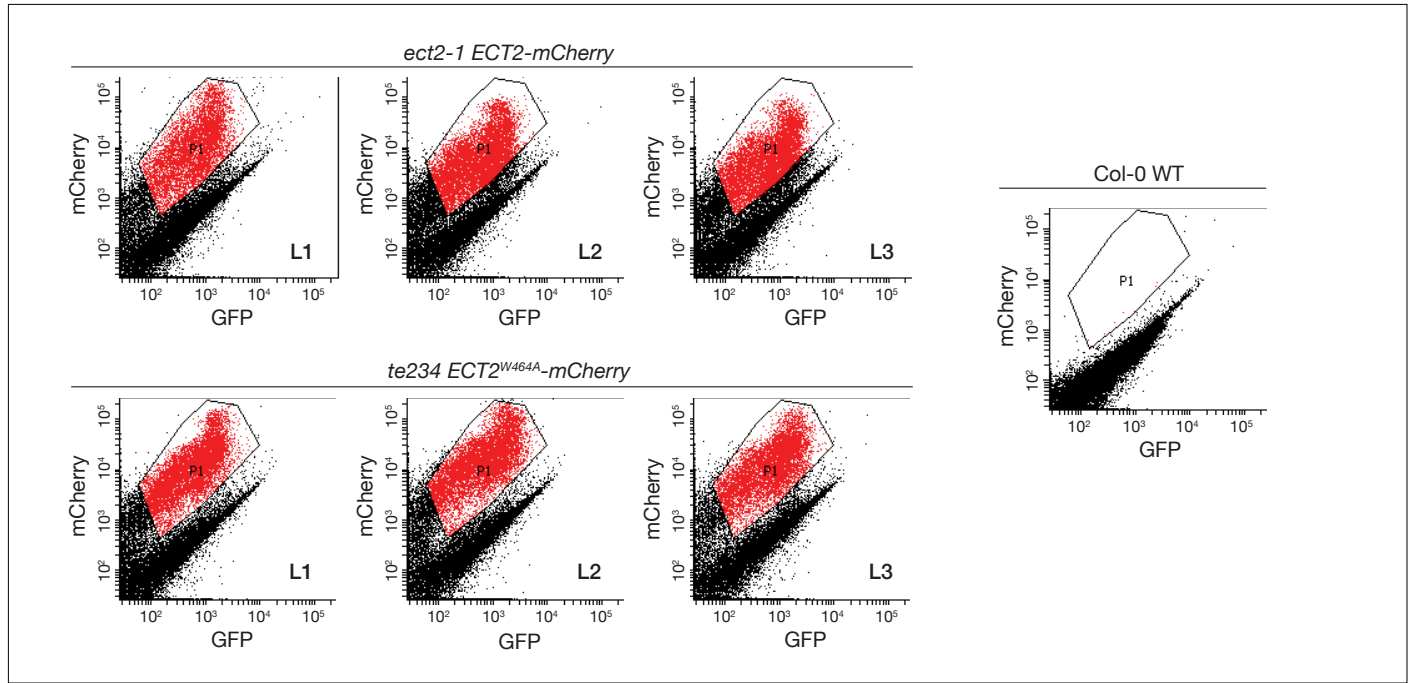

**Figure 5—figure supplement 1. FACS-sorting of root protoplasts expressing ECT2-mCherry.** Fluorescence profile (mCherry vs. GFP fluorescence) of root cells (protoplasts) from the transgenic lines used as replicates for transcriptomic analyses (Figures 5, 7). Non-transgenic Col-0 WT is shown as control for background autofluorescence. Cells with a fluorescence profile within the outlined areas were selected for RNA extraction, Smart-seq2 library construction and sequencing.

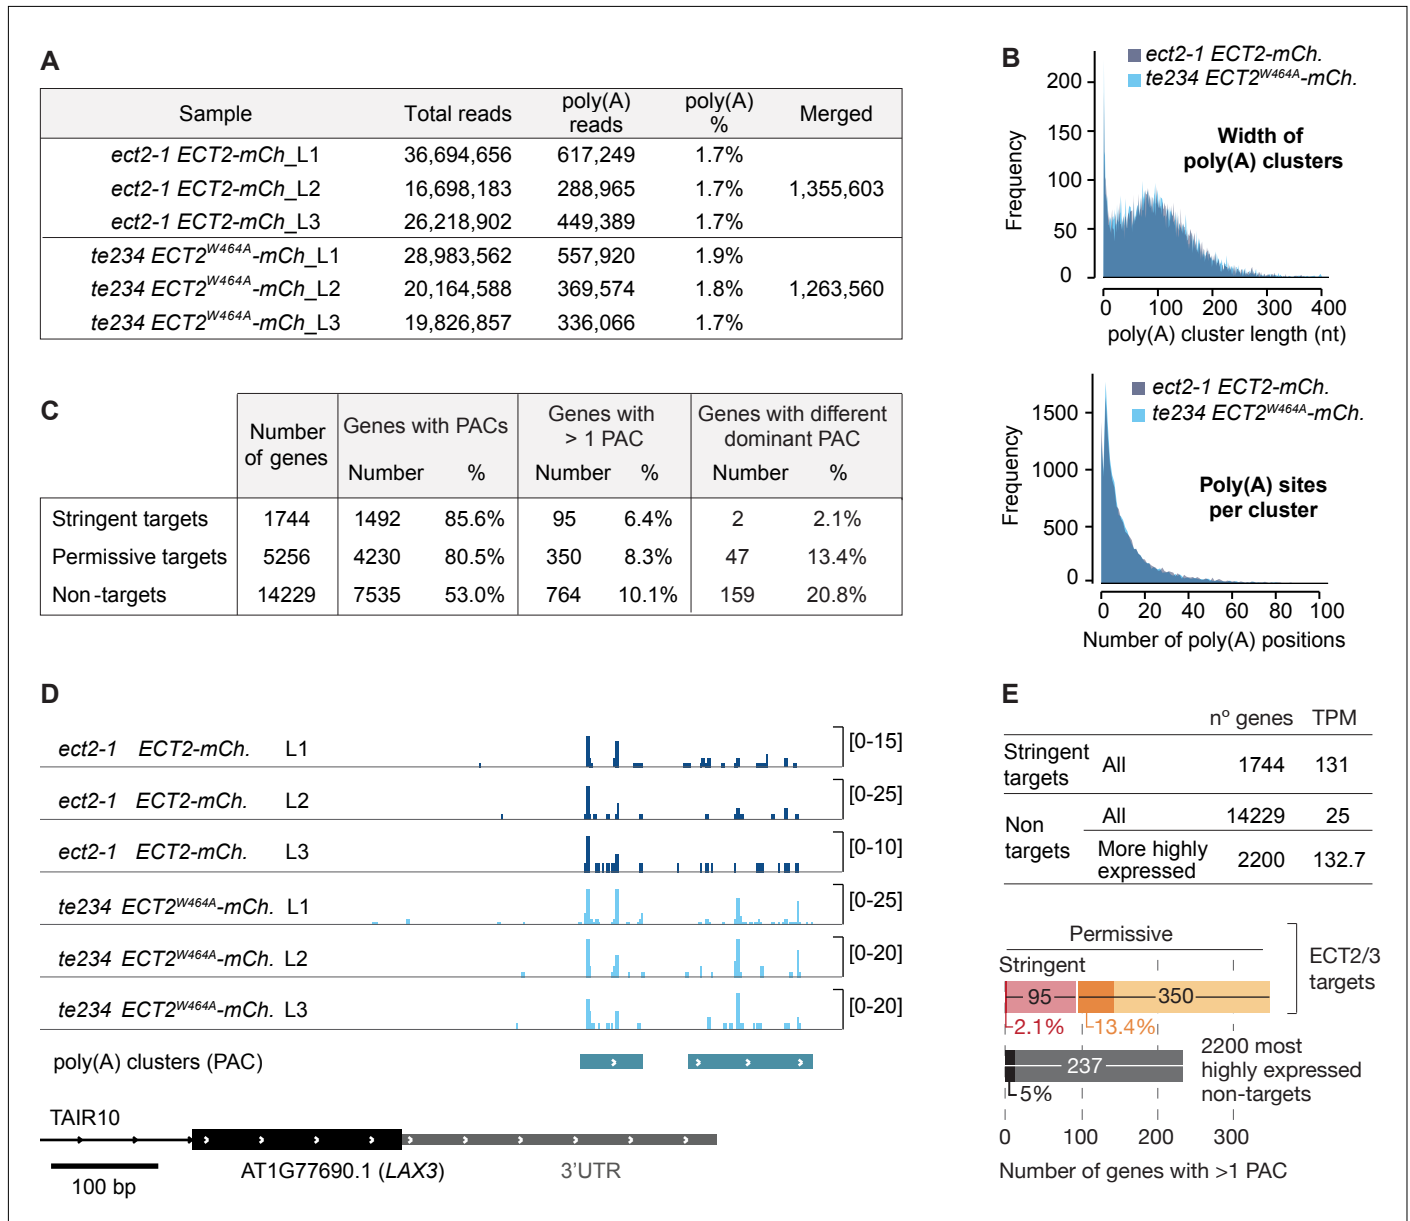

**Figure 5—figure supplement 2. Poly(A) sites do not change in ECT2/3 targets upon loss of ECT2/3/4 function (extended data).** (A) Summary of poly(A)-containing reads (i.e. reads with at least 9 untemplated As) after removal of reads mapping upstream of purine-rich sites. These reads were used for cluster identification, yielding 17,028 putative poly(A) site clusters (PACs), from which 14,667 were retained after further filtering of potential false positives (see Methods). (B) Features of PACs. (Upper panel) Genomic distance between most upstream and most downstream poly(A) site within each cluster (median length of 105 bp). (Lower panel) Total number of genomic positions within the cluster where at least 1 read with an untemplated poly(A) tail was detected (median of 12 poly(A) sites per cluster). (C) PACs sorted by ECT2/3 target status. Percentages of genes with more than 1 PAC refer to the number of genes with PACs. Percentages of genes with a dominant PAC (defined as the cluster with the most reads) that is different between *te234 ECT2<sup>W464A</sup>-mCherry* and *ect2-1 ECT2-mCh* samples refer to the number of genes with more than 1 PAC. (D) Variation in dominant polyadenylation sites for the non-ECT2/3-targeted transcript *LAX3*, an example of gene with different dominant PAC. Independently of the fact that the total amount of poly(A) reads is generally higher in *te234 ECT2<sup>W464A</sup>-mCherry* compared to *ect2-1 ECT2-mCh* samples (notice that the scales have been adjusted for optimal comparison of PAC usage within samples), the ratio between the number of reads in the upstream and the downstream clusters is different in the 2 genotypes. Transcript annotation is based on TAIR10. (E) Mean TPMs (Smart-seq2 data of sorted protoplasts, combining all 6 samples) of genes in the different ECT2/3 targets groups (upper panel). The significantly lower likelihood for ECT2/3 targets to have a different dominant PAC upon loss of ECT2/3/4 function depletion compared to non targets (Figure 5E) could be due to differences in transcript abundance between the target and non-target groups. Looking at only the 2200 most highly expressed non-target genes, only 5.5% of these genes have a different dominant PAC in *te234 ECT2<sup>W464A</sup>-mCherry* than *ect2-1 ECT2-mCh* samples (lower panel, dark shading refers to genes with different dominant PAC as in Figure 5E), significantly smaller than the percentage for all non-target genes (20.8%, Figure 5E) ( $p=3.2e-9$ , Fisher's exact test).

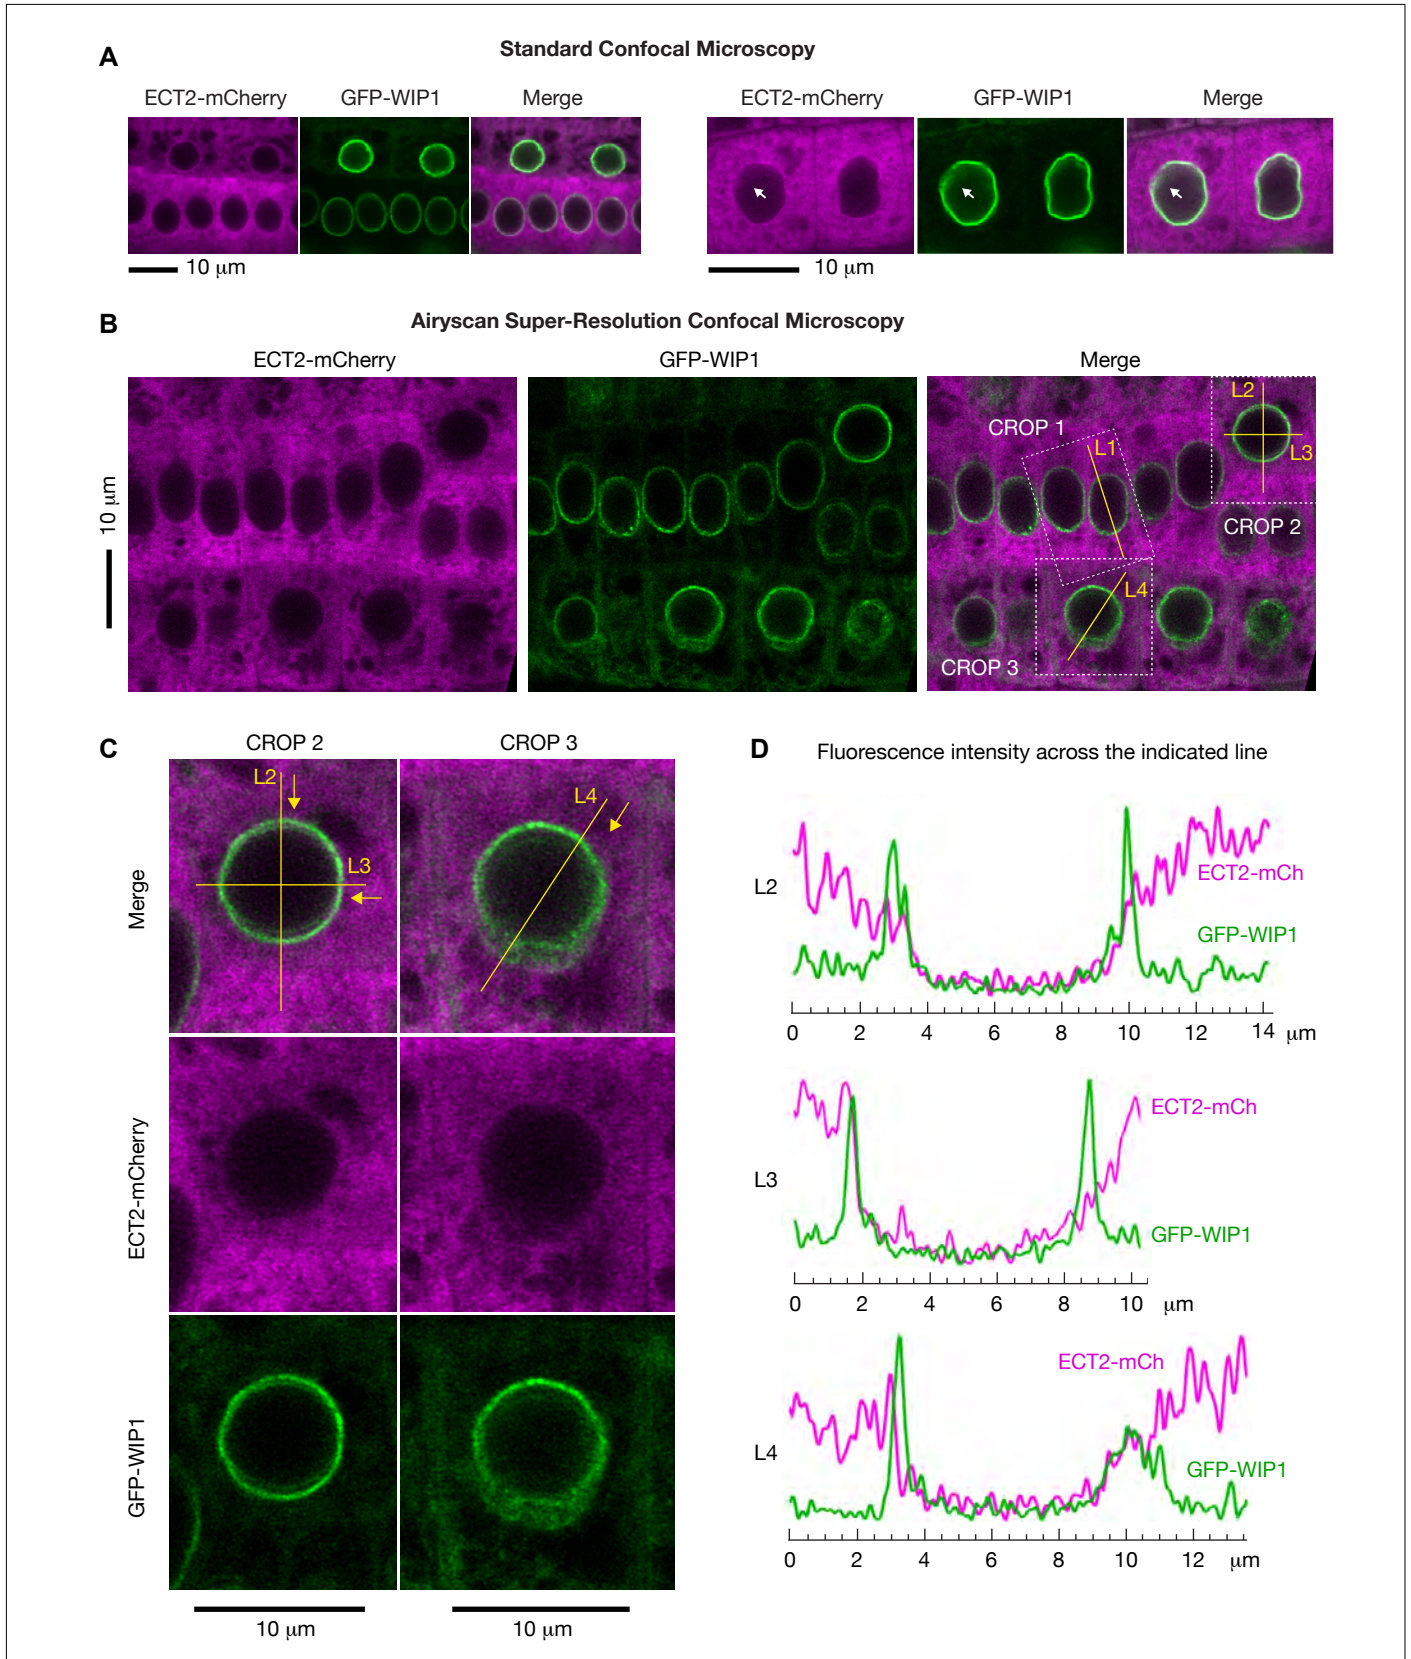

**Figure 6—figure supplement 1. Super-resolution confocal microscopy of cells co-expressing ECT2-mCherry and the nuclear envelope marker GFP-WIP1. (A)** Standard confocal microscopy of root cells co-expressing *ECT2-mCherry* and *GFP-WIP1* as in [Figure 6A](#). **(B-D)** Airyscan super-resolution confocal microscopy of root cells as in [A](#). White dashed outlines in [\(B\)](#) are magnified in [\(C\)](#) (crop 2 and 3), and mCherry/GFP fluorescence along the yellow lines (L2-4) is plotted in [\(D\)](#). Yellow arrows indicate the direction of the fluorescence plots from left to right. Magnification of crop 1 and fluorescence intensity along L1 is shown in [Figure 6B](#).

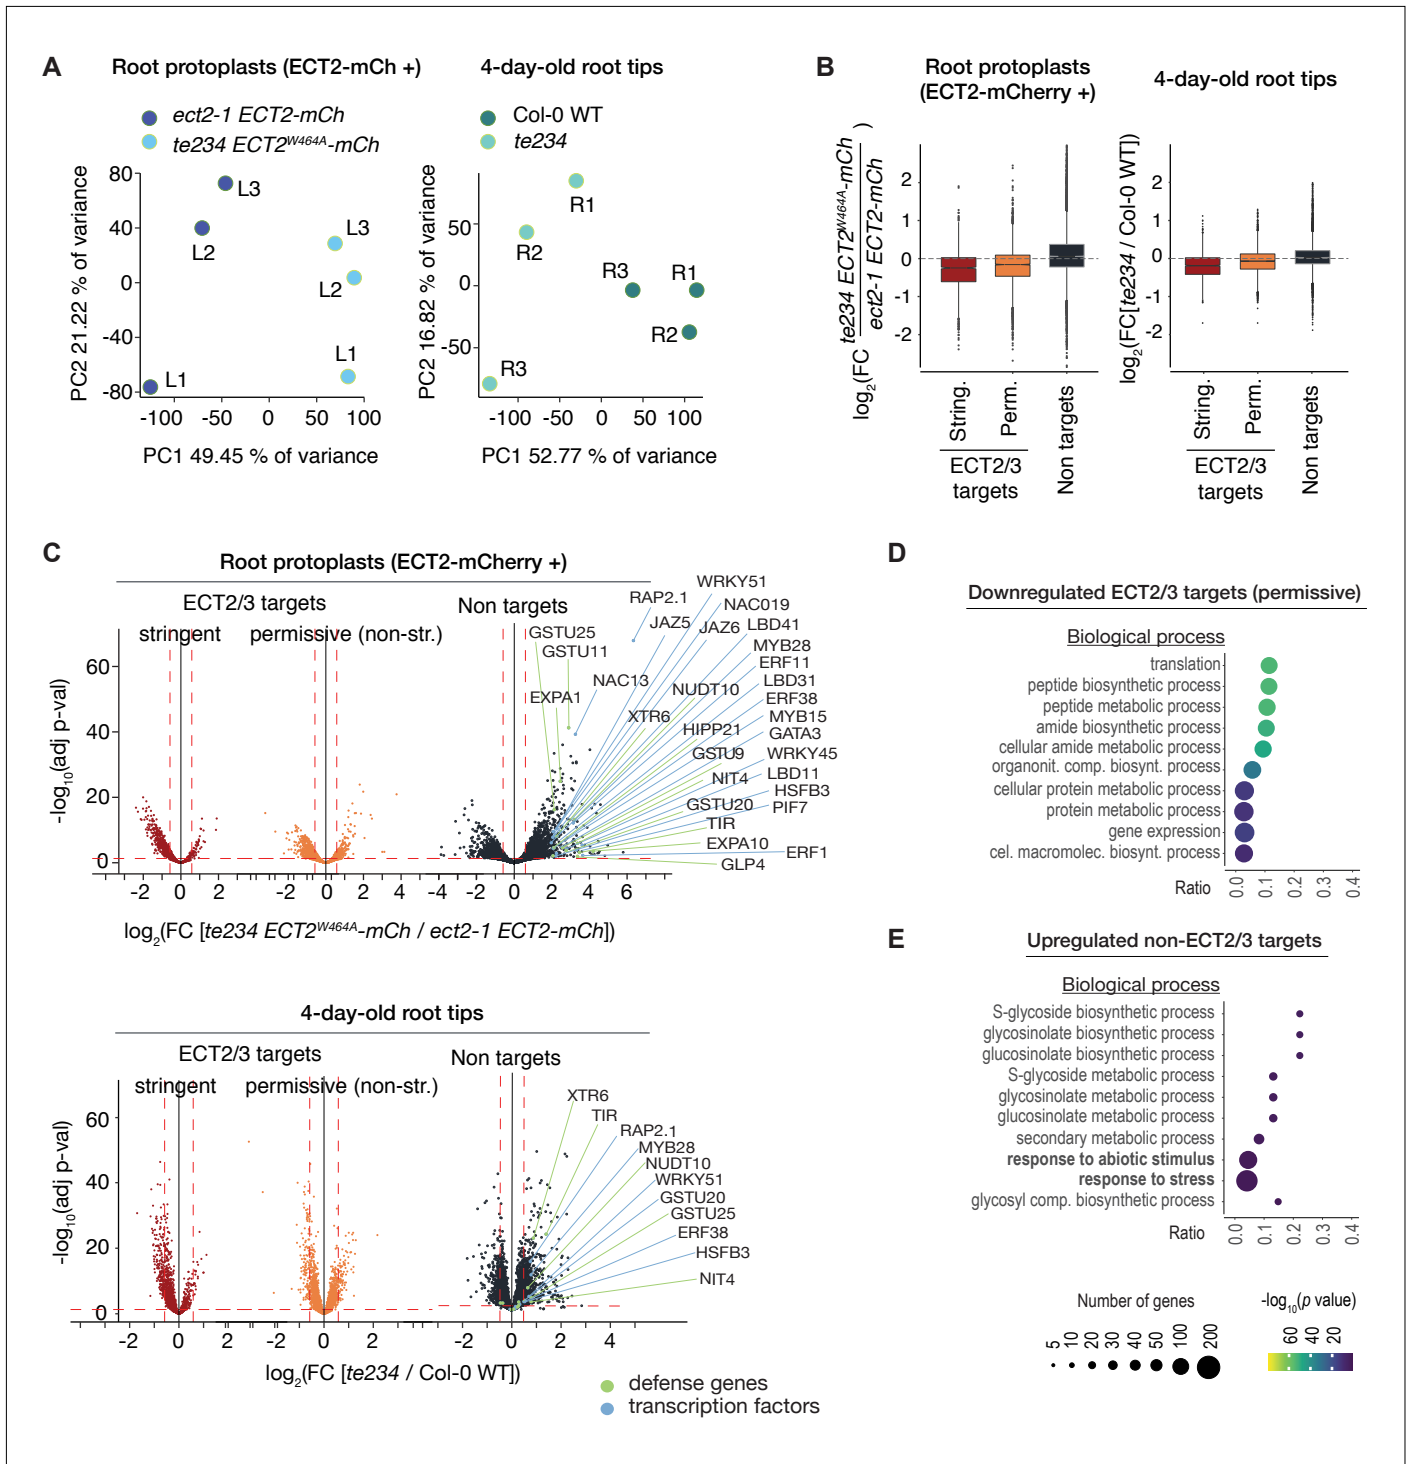

**Figure 7—figure supplement 1. ECT2/3 targets are generally less abundant in root tips of *ect2/ect3/ect4* knockout plants. (A)** Principal component analysis of transcriptome expression values (TPM) in Smart-seq2 libraries from FACS-sorted root protoplasts expressing *ECT2-mCherry* in *te234/ECT2<sup>W464A</sup>-mCherry* and *ect2-1/ECT2-mCh* 5-day-old seedlings (left panel), or in RNA-seq libraries obtained from root tips of *te234* and wild type 4-day-old seedlings (right panel). **(B)** Boxplots of  $\log_2$  fold change expression values between the genotype-pairs described in **A**. **(C)** Volcano plots showing genes differentially expressed between the genotype-pairs described in **A**. Upregulated non-ECT2/3 targeted transcription factors and stress-responsive genes are marked. **(D,E)** List with the 10 most significantly enriched GO terms among significantly upregulated ECT2/3 targets (permissive set) (D), or downregulated non-targets (E) in root tips of *ect2/3/4* knockout plants (*te234*) compared to wild type.
